# Supplementary material
Source: Research Square preprint supplement (doi:10.21203/rs.3.rs-9917734/v1)

# Supplementary Figure 4

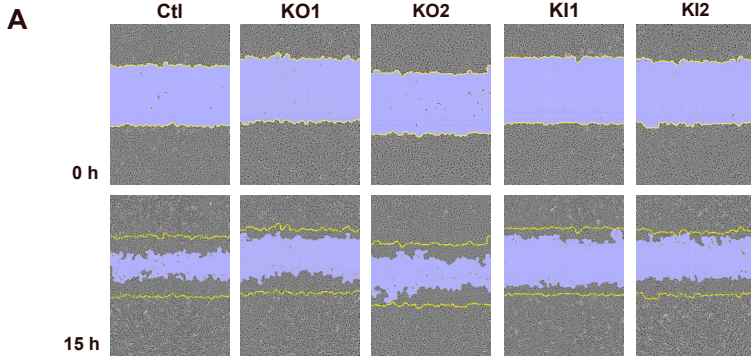

**B**

Multiple unpaired t test of migration in MDA-MB-231 cells

| Time (h) | Ctl         | KO1 vs Ctl |             | KO2 vs Ctl |             | KI1 vs Ctl |             | KI2 vs Ctl |             |
|----------|-------------|------------|-------------|------------|-------------|------------|-------------|------------|-------------|
|          | Mean of Ctl | P value    | Mean ok KO1 | P value    | Mean ok KO2 | P value    | Mean ok KI1 | P value    | Mean ok KI2 |
| 0        | 1           | 0.003997   | 0.7337      | 0.920948   | 0.9866      | 0.012076   | 0.7253      | 0.14939    | 1.185       |
| 3        | 12.55       | <0.000001  | 8.044       | <0.000001  | 8.468       | <0.000001  | 8.525       | <0.000001  | 9.169       |
| 6        | 21.61       | <0.000001  | 13.33       | <0.000001  | 15.91       | <0.000001  | 13.75       | <0.000001  | 14.41       |
| 9        | 30.35       | <0.000001  | 18.5        | <0.000001  | 23.09       | <0.000001  | 19.51       | <0.000001  | 20.23       |
| 12       | 39.35       | <0.000001  | 20.09       | <0.000001  | 30.13       | <0.000001  | 20.52       | <0.000001  | 25.54       |
| 15       | 48.2        | <0.000001  | 28.5        | <0.000001  | 36.8        | <0.000001  | 30.83       | <0.000001  | 30.48       |

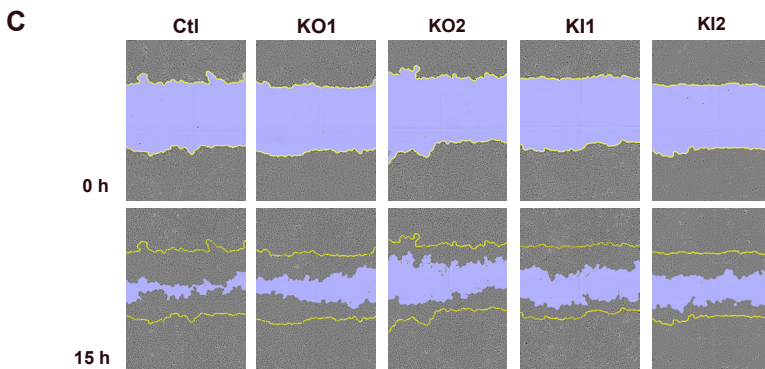

**D**

Multiple unpaired t test of migration in H5578T cells

| Time (h) | Ctl         | KO1 vs Ctl |             | KO2 vs Ctl |             | KI1 vs Ctl |             | KI2 vs Ctl |             |
|----------|-------------|------------|-------------|------------|-------------|------------|-------------|------------|-------------|
|          | Mean of Ctl | P value    | Mean ok KO1 | P value    | Mean ok KO2 | P value    | Mean ok KI1 | P value    | Mean ok KI2 |
| 0        | 0.6466      | 0.014973   | 0.3677      | 0.287122   | 0.5198      | 0.712813   | 0.6059      | 0.195358   | 0.5011      |
| 2        | 14.48       | <0.000001  | 7.338       | <0.000001  | 10.22       | <0.000001  | 6.602       | <0.000001  | 6.578       |
| 4        | 26.08       | <0.000001  | 13.42       | <0.000001  | 18.39       | <0.000001  | 12          | <0.000001  | 12.71       |
| 6        | 36.39       | <0.000001  | 19.62       | <0.000001  | 25.68       | <0.000001  | 17.6        | <0.000001  | 18.62       |
| 8        | 45.21       | <0.000001  | 26.05       | <0.000001  | 31.88       | <0.000001  | 22.46       | <0.000001  | 24.44       |
| 10       | 52.62       | <0.000001  | 31.61       | <0.000001  | 36.68       | <0.000001  | 27.57       | <0.000001  | 29.63       |
| 12       | 59.61       | <0.000001  | 38.46       | <0.000001  | 42.46       | <0.000001  | 31.89       | <0.000001  | 34.55       |
| 14       | 65.54       | <0.000001  | 45.74       | <0.000001  | 48.93       | <0.000001  | 36.51       | <0.000001  | 38.88       |

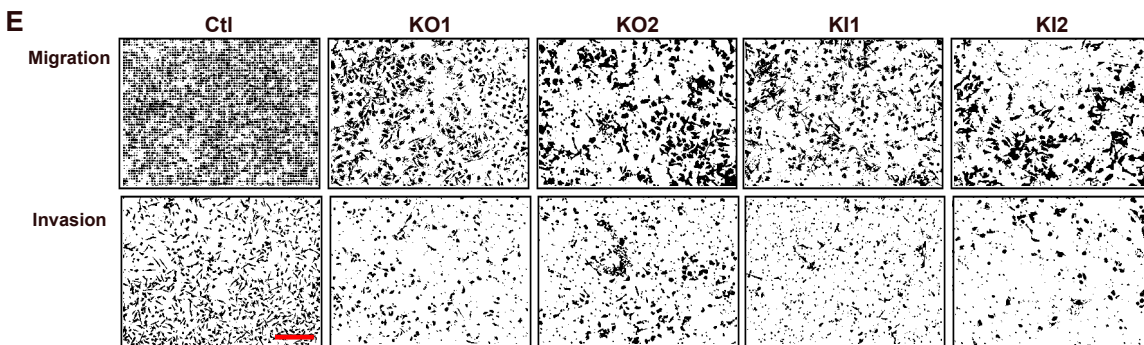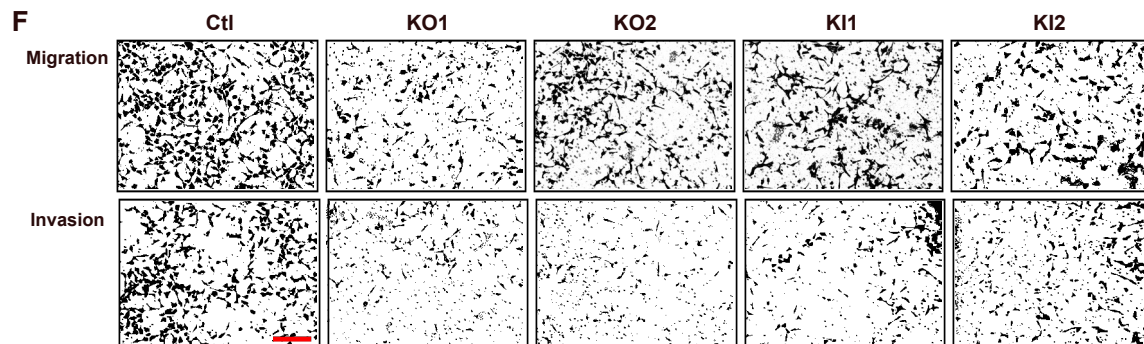

Supplement: Supplementary file 3 [file 824421d170bf64e553b679b5.pdf]
