# Supplementary material
Source: Research Square preprint supplement (doi:10.21203/rs.3.rs-9917734/v1)
Supplement: Supplementary file 1 [file 06ab56208a2fe90f816fef97.xlsx]

## Sheet: LRP6 staining by flow cytometry
	Tukey's multiple comparisons test	Mean Diff.	95.00% CI of diff.	Below threshold?	Summary	Adjusted P Value
	Ctl Uns vs. Ctl 5%	-0.7699	-1.283 to -0.2567	Yes	***	0.0007	A-B			Ctl 5%	A
	Ctl Uns vs. KO1 Uns	0.9151	0.2866 to 1.544	Yes	**	0.0011	A-C			Ctl Uns	B
	Ctl Uns vs. KO1 5%	0.6434	0.01486 to 1.272	Yes	*	0.0417	A-D			KI1 5%	B C
	Ctl Uns vs. KO2 Uns	0.8915	0.2630 to 1.520	Yes	**	0.0015	A-E			KO2 5%	B C
	Ctl Uns vs. KO2 5%	0.6133	-0.01522 to 1.242	No	ns	0.06	A-F			KI2 5%	C
	Ctl Uns vs. KI2 Uns	0.8192	0.1906 to 1.448	Yes	**	0.0042	A-G			KO1 5%	C
	Ctl Uns vs. KI2 5%	0.6334	0.004891 to 1.262	Yes	*	0.0471	A-H			KI1 Uns	C
	Ctl Uns vs. KI1 Uns	0.7174	0.08888 to 1.346	Yes	*	0.0163	A-I			KI2 Uns	C
	Ctl Uns vs. KI1 5%	0.502	-0.1266 to 1.131	No	ns	0.2036	A-J			KO2 Uns	C
	Ctl 5% vs. KO1 Uns	1.685	1.056 to 2.314	Yes	****	<0.0001	B-C			KO1 Uns	C
	Ctl 5% vs. KO1 5%	1.413	0.7847 to 2.042	Yes	****	<0.0001	B-D
	Ctl 5% vs. KO2 Uns	1.661	1.033 to 2.290	Yes	****	<0.0001	B-E
	Ctl 5% vs. KO2 5%	1.383	0.7546 to 2.012	Yes	****	<0.0001	B-F
	Ctl 5% vs. KI2 Uns	1.589	0.9605 to 2.218	Yes	****	<0.0001	B-G
	Ctl 5% vs. KI2 5%	1.403	0.7747 to 2.032	Yes	****	<0.0001	B-H
	Ctl 5% vs. KI1 Uns	1.487	0.8587 to 2.116	Yes	****	<0.0001	B-I
	Ctl 5% vs. KI1 5%	1.272	0.6433 to 1.900	Yes	****	<0.0001	B-J
	KO1 Uns vs. KO1 5%	-0.2717	-0.9975 to 0.4540	No	ns	0.9468	C-D
	KO1 Uns vs. KO2 Uns	-0.02359	-0.7494 to 0.7022	No	ns	>0.9999	C-E
	KO1 Uns vs. KO2 5%	-0.3018	-1.028 to 0.4240	No	ns	0.9047	C-F
	KO1 Uns vs. KI2 Uns	-0.09596	-0.8217 to 0.6298	No	ns	>0.9999	C-G
	KO1 Uns vs. KI2 5%	-0.2817	-1.007 to 0.4441	No	ns	0.9345	C-H
	KO1 Uns vs. KI1 Uns	-0.1977	-0.9235 to 0.5281	No	ns	0.9933	C-I
	KO1 Uns vs. KI1 5%	-0.4131	-1.139 to 0.3126	No	ns	0.6289	C-J
	KO1 5% vs. KO2 Uns	0.2481	-0.4776 to 0.9739	No	ns	0.9692	D-E
	KO1 5% vs. KO2 5%	-0.03007	-0.7559 to 0.6957	No	ns	>0.9999	D-F
	KO1 5% vs. KI2 Uns	0.1758	-0.5500 to 0.9015	No	ns	0.9972	D-G
	KO1 5% vs. KI2 5%	-0.009966	-0.7357 to 0.7158	No	ns	>0.9999	D-H
	KO1 5% vs. KI1 Uns	0.07402	-0.6518 to 0.7998	No	ns	>0.9999	D-I
	KO1 5% vs. KI1 5%	-0.1414	-0.8672 to 0.5844	No	ns	0.9995	D-J
	KO2 Uns vs. KO2 5%	-0.2782	-1.004 to 0.4476	No	ns	0.939	E-F
	KO2 Uns vs. KI2 Uns	-0.07238	-0.7982 to 0.6534	No	ns	>0.9999	E-G
	KO2 Uns vs. KI2 5%	-0.2581	-0.9839 to 0.4677	No	ns	0.9608	E-H
	KO2 Uns vs. KI1 Uns	-0.1741	-0.8999 to 0.5517	No	ns	0.9974	E-I
	KO2 Uns vs. KI1 5%	-0.3896	-1.115 to 0.3362	No	ns	0.6984	E-J
	KO2 5% vs. KI2 Uns	0.2058	-0.5199 to 0.9316	No	ns	0.9911	F-G
	KO2 5% vs. KI2 5%	0.02011	-0.7057 to 0.7459	No	ns	>0.9999	F-H
	KO2 5% vs. KI1 Uns	0.1041	-0.6217 to 0.8299	No	ns	>0.9999	F-I
	KO2 5% vs. KI1 5%	-0.1113	-0.8371 to 0.6144	No	ns	>0.9999	F-J
	KI2 Uns vs. KI2 5%	-0.1857	-0.9115 to 0.5400	No	ns	0.9957	G-H
	KI2 Uns vs. KI1 Uns	-0.1018	-0.8275 to 0.6240	No	ns	>0.9999	G-I
	KI2 Uns vs. KI1 5%	-0.3172	-1.043 to 0.4086	No	ns	0.877	G-J
	KI2 5% vs. KI1 Uns	0.08398	-0.6418 to 0.8098	No	ns	>0.9999	H-I
	KI2 5% vs. KI1 5%	-0.1314	-0.8572 to 0.5943	No	ns	0.9997	H-J
	KI1 Uns vs. KI1 5%	-0.2154	-0.9412 to 0.5103	No	ns	0.9878	I-J

## Sheet: Beta catenin by WB
		Tukey's multiple comparisons test	Mean Diff.	95.00% CI of diff.	Below threshold?	Summary	Adjusted P Value			Compact letter display
		Ctl Uns vs. Ctl 5%	-1.165	-1.745 to -0.5863	Yes	****	<0.0001			Ctl 5%	A
		Ctl Uns vs. KO1 Uns	0.2867	-0.2925 to 0.8659	No	ns	0.774			KI2 5%	B
		Ctl Uns vs. KO1 5%	-0.09276	-0.6720 to 0.4865	No	ns	0.9999			KO2 5%	B C
		Ctl Uns vs. KO2 Uns	0.528	-0.09763 to 1.154	No	ns	0.1503			KO1 5%	B D
		Ctl Uns vs. KO2 5%	-0.1457	-0.7714 to 0.4799	No	ns	0.9977			Ctl Uns	B D
		Ctl Uns vs. KI2 Uns	0.486	-0.1396 to 1.112	No	ns	0.2286			KI1 5%	B D
		Ctl Uns vs. KI2 5%	-0.2137	-0.8393 to 0.4120	No	ns	0.9675			KO1 Uns	B D
		Ctl Uns vs. KI1 Uns	0.4931	-0.1325 to 1.119	No	ns	0.2135			KI2 Uns	C D
		Ctl Uns vs. KI1 5%	0.01505	-0.6106 to 0.6407	No	ns	>0.9999			KI1 Uns	C D
		Ctl 5% vs. KO1 Uns	1.452	0.8730 to 2.031	Yes	****	<0.0001			KO2 Uns	D
		Ctl 5% vs. KO1 5%	1.073	0.4935 to 1.652	Yes	****	<0.0001
		Ctl 5% vs. KO2 Uns	1.693	1.068 to 2.319	Yes	****	<0.0001
		Ctl 5% vs. KO2 5%	1.02	0.3941 to 1.645	Yes	***	0.0003
		Ctl 5% vs. KI2 Uns	1.651	1.026 to 2.277	Yes	****	<0.0001
		Ctl 5% vs. KI2 5%	0.9518	0.3262 to 1.577	Yes	***	0.0007
		Ctl 5% vs. KI1 Uns	1.659	1.033 to 2.284	Yes	****	<0.0001
		Ctl 5% vs. KI1 5%	1.181	0.5549 to 1.806	Yes	****	<0.0001
		KO1 Uns vs. KO1 5%	-0.3795	-0.9587 to 0.1997	No	ns	0.437
		KO1 Uns vs. KO2 Uns	0.2413	-0.3843 to 0.8669	No	ns	0.9335
		KO1 Uns vs. KO2 5%	-0.4324	-1.058 to 0.1932	No	ns	0.3668
		KO1 Uns vs. KI2 Uns	0.1993	-0.4263 to 0.8249	No	ns	0.9791
		KO1 Uns vs. KI2 5%	-0.5004	-1.126 to 0.1253	No	ns	0.1989
		KO1 Uns vs. KI1 Uns	0.2064	-0.4192 to 0.8320	No	ns	0.9739
		KO1 Uns vs. KI1 5%	-0.2717	-0.8973 to 0.3540	No	ns	0.8756
		KO1 5% vs. KO2 Uns	0.6208	-0.004867 to 1.246	No	ns	0.053
		KO1 5% vs. KO2 5%	-0.05298	-0.6786 to 0.5726	No	ns	>0.9999
		KO1 5% vs. KI2 Uns	0.5787	-0.04688 to 1.204	No	ns	0.0864
		KO1 5% vs. KI2 5%	-0.1209	-0.7465 to 0.5047	No	ns	0.9995
		KO1 5% vs. KI1 Uns	0.5859	-0.03976 to 1.211	No	ns	0.0797
		KO1 5% vs. KI1 5%	0.1078	-0.5178 to 0.7334	No	ns	0.9998
		KO2 Uns vs. KO2 5%	-0.6737	-1.343 to -0.004916	Yes	*	0.0473
		KO2 Uns vs. KI2 Uns	-0.04201	-0.7108 to 0.6268	No	ns	>0.9999
		KO2 Uns vs. KI2 5%	-0.7416	-1.410 to -0.07283	Yes	*	0.0216
		KO2 Uns vs. KI1 Uns	-0.03489	-0.7037 to 0.6339	No	ns	>0.9999
		KO2 Uns vs. KI1 5%	-0.5129	-1.182 to 0.1559	No	ns	0.2423
		KO2 5% vs. KI2 Uns	0.6317	-0.03709 to 1.301	No	ns	0.0752
		KO2 5% vs. KI2 5%	-0.06792	-0.7367 to 0.6009	No	ns	>0.9999
		KO2 5% vs. KI1 Uns	0.6388	-0.02997 to 1.308	No	ns	0.0696
		KO2 5% vs. KI1 5%	0.1608	-0.5080 to 0.8296	No	ns	0.9971
		KI2 Uns vs. KI2 5%	-0.6996	-1.368 to -0.03082	Yes	*	0.0352
		KI2 Uns vs. KI1 Uns	0.007118	-0.6617 to 0.6759	No	ns	>0.9999
		KI2 Uns vs. KI1 5%	-0.4709	-1.140 to 0.1979	No	ns	0.3433
		KI2 5% vs. KI1 Uns	0.7068	0.03794 to 1.376	Yes	*	0.0324
		KI2 5% vs. KI1 5%	0.2287	-0.4401 to 0.8975	No	ns	0.9673
		KI1 Uns vs. KI1 5%	-0.4781	-1.147 to 0.1908	No	ns	0.3246

## Sheet: TCF LEF activity by DLR
		Tukey's multiple comparisons test	Mean Diff.	95.00% CI of diff.	Below threshold?	Summary	Adjusted P Value			Ctl 5%	A
		Ctl Uns vs. Ctl 5%	-14.5	-20.89 to -8.107	Yes	****	<0.0001			KI1 5%	A B
		Ctl Uns vs. KO1 Uns	0.669	-6.477 to 7.815	No	ns	>0.9999			KI2 5%	B C
		Ctl Uns vs. KO1 5%	-1.639	-8.784 to 5.507	No	ns	0.9983			KO2 5%	B C
		Ctl Uns vs. KO2 Uns	0.6951	-7.133 to 8.523	No	ns	>0.9999			KO1 5%	B C
		Ctl Uns vs. KO2 5%	-1.672	-9.500 to 6.155	No	ns	0.999			Ctl Uns	C
		Ctl Uns vs. KI2 Uns	0.5552	-7.272 to 8.383	No	ns	>0.9999			KI1 Uns	B C
		Ctl Uns vs. KI2 5%	-5.295	-13.12 to 2.533	No	ns	0.4079			KI2 Uns	B C
		Ctl Uns vs. KI1 Uns	0.4314	-7.396 to 8.259	No	ns	>0.9999			KO 1 Uns	C
		Ctl Uns vs. KI1 5%	-7.878	-15.71 to -0.05063	Yes	*	0.0476			KO2 Uns	B C
		Ctl 5% vs. KO1 Uns	15.17	8.021 to 22.31	Yes	****	<0.0001
		Ctl 5% vs. KO1 5%	12.86	5.713 to 20.00	Yes	****	<0.0001
		Ctl 5% vs. KO2 Uns	15.19	7.365 to 23.02	Yes	****	<0.0001
		Ctl 5% vs. KO2 5%	12.83	4.998 to 20.65	Yes	***	0.0002
		Ctl 5% vs. KI2 Uns	15.05	7.225 to 22.88	Yes	****	<0.0001
		Ctl 5% vs. KI2 5%	9.203	1.376 to 17.03	Yes	*	0.0119
		Ctl 5% vs. KI1 Uns	14.93	7.102 to 22.76	Yes	****	<0.0001
		Ctl 5% vs. KI1 5%	6.62	-1.208 to 14.45	No	ns	0.1526
		KO1 Uns vs. KO1 5%	-2.308	-10.14 to 5.520	No	ns	0.989
		KO1 Uns vs. KO2 Uns	0.02602	-8.429 to 8.481	No	ns	>0.9999
		KO1 Uns vs. KO2 5%	-2.341	-10.80 to 6.114	No	ns	0.9929
		KO1 Uns vs. KI2 Uns	-0.1138	-8.569 to 8.341	No	ns	>0.9999
		KO1 Uns vs. KI2 5%	-5.964	-14.42 to 2.491	No	ns	0.3526
		KO1 Uns vs. KI1 Uns	-0.2377	-8.692 to 8.217	No	ns	>0.9999
		KO1 Uns vs. KI1 5%	-8.547	-17.00 to -0.09248	Yes	*	0.0459
		KO1 5% vs. KO2 Uns	2.334	-6.121 to 10.79	No	ns	0.9931
		KO1 5% vs. KO2 5%	-0.03337	-8.488 to 8.421	No	ns	>0.9999
		KO1 5% vs. KI2 Uns	2.194	-6.261 to 10.65	No	ns	0.9956
		KO1 5% vs. KI2 5%	-3.656	-12.11 to 4.799	No	ns	0.8878
		KO1 5% vs. KI1 Uns	2.07	-6.385 to 10.52	No	ns	0.9971
		KO1 5% vs. KI1 5%	-6.239	-14.69 to 2.215	No	ns	0.2956
		KO2 Uns vs. KO2 5%	-2.367	-11.41 to 6.671	No	ns	0.9953
		KO2 Uns vs. KI2 Uns	-0.1398	-9.178 to 8.899	No	ns	>0.9999
		KO2 Uns vs. KI2 5%	-5.99	-15.03 to 3.049	No	ns	0.4355
		KO2 Uns vs. KI1 Uns	-0.2637	-9.302 to 8.775	No	ns	>0.9999
		KO2 Uns vs. KI1 5%	-8.573	-17.61 to 0.4653	No	ns	0.0739
		KO2 5% vs. KI2 Uns	2.227	-6.811 to 11.27	No	ns	0.997
		KO2 5% vs. KI2 5%	-3.622	-12.66 to 5.416	No	ns	0.9251
		KO2 5% vs. KI1 Uns	2.104	-6.935 to 11.14	No	ns	0.998
		KO2 5% vs. KI1 5%	-6.206	-15.24 to 2.832	No	ns	0.3879
		KI2 Uns vs. KI2 5%	-5.85	-14.89 to 3.189	No	ns	0.4675
		KI2 Uns vs. KI1 Uns	-0.1238	-9.162 to 8.915	No	ns	>0.9999
		KI2 Uns vs. KI1 5%	-8.433	-17.47 to 0.6051	No	ns	0.0828
		KI2 5% vs. KI1 Uns	5.726	-3.313 to 14.76	No	ns	0.4965
		KI2 5% vs. KI1 5%	-2.584	-11.62 to 6.455	No	ns	0.9912
		KI1 Uns vs. KI1 5%	-8.31	-17.35 to 0.7289	No	ns	0.0915

## Sheet: AXIN-2 expression by qPCR
		Tukey's multiple comparisons test	Mean Diff.	95.00% CI of diff.	Below threshold?	Summary	Adjusted P Value			Ctl 5%	A
		Ctl Uns vs. Ctl 5%	-3.005	-5.016 to -0.9938	Yes	**	0.001			KI1 5%	B
		Ctl Uns vs. KO1 Uns	0.6785	-1.494 to 2.851	No	ns	0.9802			KO2 5%	B
		Ctl Uns vs. KO1 5%	-0.06518	-2.237 to 2.107	No	ns	>0.9999			KO1 5%	B
		Ctl Uns vs. KO2 Uns	0.8484	-1.324 to 3.021	No	ns	0.9243			KI2 5%	B
		Ctl Uns vs. KO2 5%	-0.1629	-2.335 to 2.009	No	ns	>0.9999			Ctl Uns	B
		Ctl Uns vs. KI2 Uns	0.7606	-1.412 to 2.933	No	ns	0.9595			KI1 Uns	B
		Ctl Uns vs. KI2 5%	-0.05922	-2.231 to 2.113	No	ns	>0.9999			KO1 Uns	B
		Ctl Uns vs. KI1 Uns	0.584	-1.588 to 2.756	No	ns	0.9928			KI2 Uns	B
		Ctl Uns vs. KI1 5%	-0.7654	-2.938 to 1.407	No	ns	0.9579			KO2 Uns	B
		Ctl 5% vs. KO1 Uns	3.683	1.511 to 5.856	Yes	***	0.0002
		Ctl 5% vs. KO1 5%	2.94	0.7674 to 5.112	Yes	**	0.0031
		Ctl 5% vs. KO2 Uns	3.853	1.681 to 6.026	Yes	***	0.0001
		Ctl 5% vs. KO2 5%	2.842	0.6697 to 5.014	Yes	**	0.0045
		Ctl 5% vs. KI2 Uns	3.765	1.593 to 5.938	Yes	***	0.0001
		Ctl 5% vs. KI2 5%	2.946	0.7734 to 5.118	Yes	**	0.0031
		Ctl 5% vs. KI1 Uns	3.589	1.417 to 5.761	Yes	***	0.0003
		Ctl 5% vs. KI1 5%	2.239	0.06718 to 4.412	Yes	*	0.0398
		KO1 Uns vs. KO1 5%	-0.7437	-3.066 to 1.579	No	ns	0.9767
		KO1 Uns vs. KO2 Uns	0.17	-2.152 to 2.492	No	ns	>0.9999
		KO1 Uns vs. KO2 5%	-0.8414	-3.164 to 1.481	No	ns	0.9504
		KO1 Uns vs. KI2 Uns	0.08216	-2.240 to 2.404	No	ns	>0.9999
		KO1 Uns vs. KI2 5%	-0.7377	-3.060 to 1.585	No	ns	0.9779
		KO1 Uns vs. KI1 Uns	-0.09447	-2.417 to 2.228	No	ns	>0.9999
		KO1 Uns vs. KI1 5%	-1.444	-3.766 to 0.8783	No	ns	0.4971
		KO1 5% vs. KO2 Uns	0.9136	-1.409 to 3.236	No	ns	0.9212
		KO1 5% vs. KO2 5%	-0.09774	-2.420 to 2.224	No	ns	>0.9999
		KO1 5% vs. KI2 Uns	0.8258	-1.496 to 3.148	No	ns	0.9556
		KO1 5% vs. KI2 5%	0.005963	-2.316 to 2.328	No	ns	>0.9999
		KO1 5% vs. KI1 Uns	0.6492	-1.673 to 2.971	No	ns	0.9906
		KO1 5% vs. KI1 5%	-0.7003	-3.022 to 1.622	No	ns	0.9843
		KO2 Uns vs. KO2 5%	-1.011	-3.334 to 1.311	No	ns	0.8674
		KO2 Uns vs. KI2 Uns	-0.08781	-2.410 to 2.234	No	ns	>0.9999
		KO2 Uns vs. KI2 5%	-0.9077	-3.230 to 1.415	No	ns	0.924
		KO2 Uns vs. KI1 Uns	-0.2644	-2.587 to 2.058	No	ns	>0.9999
		KO2 Uns vs. KI1 5%	-1.614	-3.936 to 0.7083	No	ns	0.3525
		KO2 5% vs. KI2 Uns	0.9236	-1.399 to 3.246	No	ns	0.9165
		KO2 5% vs. KI2 5%	0.1037	-2.219 to 2.426	No	ns	>0.9999
		KO2 5% vs. KI1 Uns	0.7469	-1.575 to 3.069	No	ns	0.976
		KO2 5% vs. KI1 5%	-0.6025	-2.925 to 1.720	No	ns	0.9944
		KI2 Uns vs. KI2 5%	-0.8199	-3.142 to 1.502	No	ns	0.9574
		KI2 Uns vs. KI1 Uns	-0.1766	-2.499 to 2.146	No	ns	>0.9999
		KI2 Uns vs. KI1 5%	-1.526	-3.848 to 0.7961	No	ns	0.4243
		KI2 5% vs. KI1 Uns	0.6432	-1.679 to 2.965	No	ns	0.9912
		KI2 5% vs. KI1 5%	-0.7062	-3.028 to 1.616	No	ns	0.9833
		KI1 Uns vs. KI1 5%	-1.349	-3.672 to 0.9728	No	ns	0.5847
