# Supplementary material
Source: Research Square preprint supplement (doi:10.21203/rs.3.rs-9917734/v1)
Supplement: Supplementary file 2 [file 80999eebbe7c6e17b8e9ab8f.xlsx]

## Sheet: Sheet1
Table 4. List of antibodies used in this study.						WB=Western Blot
Antibodies	Source	Identifier	Application	Dilution/		IP= Immunoprecipitation
				Quantity		FC= Flow cytometry
CdGAP (D6J9G) Rabbit mAb	Cell Signalling Technology	Cat# 14087	WB/IP	1:1000/ 1 mg per mg of lysate		IF= Immunofluorescence
		RRID: AB_2798388				IHC=Immunohistochemistry
Monoclonal anti- Alpha-Tubulin antibody	Sigma-Aldrich	Cat# T5168, RRID: AB_477579	WB	1:500
Anti-GAPDH Antibody clone 6C5	Millipore	Cat# MAB374, RRID: AB_2107445	WB	1:1000
LIMD1 rabbit antibody	Cell Signalling Technology	Cat# 13245, RRID: AB_2798160	WB	1:1000
Xpress monoclonal antibody	Thermo Fisher Scientific	Cat# R910-25, RRID: AB_2556552	WB/IP	1:1000
Rabbit Gamma Globulin	Thermo Fisher Scientific	Cat# 31887, RRID: AB_2532177	IP	1 mg per mg of lysate
GFP polyclonal antibody	Thermo Fisher Scientific	Cat# A-6455, RRID: AB_221570	IP	1 mg per mg of lysate
GFP recombinant rabbit monoclonal	Thermo Fisher Scientific	Cat# G10362, RRID: AB_2536526	WB	1:1000
Myc-tag antibody #2272	Cell Signalling Technology	Cat# 2272, RRID: AB_10692100	WB/ IP	1:1000/ 1 mg per mg of lysate
Non-phosho (Active) b-Catenin (Ser33/37/Thr41) (D13A1) Rabbit mAb	Cell Signalling Technology	Cat# 8814, RRID: AB_11127203	WB	1:1000
b-Catenin (D10A8) XP® Rabbit mAb	Cell Signalling Technology	Cat# 8480, RRID: AB_11127855	WB	1:1000
Phalloidin-TRITC	Sigma-Aldrich	Cat# P1951, RRID: AB_2315148	IF	1:1000
Anti-LRP6 Purified Mouse monoclonal IgG (255302)	R&D systems	Cat# MAB1505, RRID: AB_10889810	FC	2.5 mg per 1 million cells
Mouse gamma globulin	Thermo Fisher Scientific	Cat# 31878, RRID: AB_2532170	FC	2.5 mg per 1 million cells
Goat anti-mouse IgG (H + L) Cross-Adsorbed secondary antibody, Alexa Fluor™ 647	Thermo Fisher Scientific	Cat# A-12235, RRID: AB_2535804	FC	5 mg/ml
Anti-Vinculin Monoclonal Antibody	Sigma-Aldrich	Cat # V9131, RRID: AB_477629	IF	1:200
Anti-Ki67 antibody	Abcam	Cat# ab15580	IHC	1:300
Anti-CD31 antibody	Abcam	Cat# ab124432	IHC	1:1200
Cleaved Caspase-3 (Asp175) Antibody	Cell Signalling Technology	Cat# 9661s	IHC	1:300
