# Supplementary material
Source: Research Square preprint supplement (doi:10.21203/rs.3.rs-9917734/v1)
Supplement: Supplementary file 3 [file 9c45e91cc1118febdb6bca6d.xlsx]

## Sheet: Sheet1
Table 3. Recombinant DNA used in this study
Recombinant DNA	Reference	Identifier
PspCas9(BB)-2A-Puro (PX459)	Ran et al. 2013 (25)	Addgene Cat# 48139
pRK5-myc vector	LaLonde et al. 2006 (22)	N/A
pRK5-myc-CdGAP		N/A
pEGFP-C1	McCormack et al. 2017 (44)	BD biosciences Cat # 6084-1
pEGFP-C1 mCdGAP full length		N/A
pEGFP-C1 mCdGAP 1-820		N/A
pEGFP-C1 mCdGAP 1160-1425		N/A
pEGFP-C1 mCdGAP R1172A		N/A
pEGFP-C1 mCdGAP R1412A		N/A
pEGFP-C1 mCdGAP R1172A/R1412A		N/A
pcDNA4/His Max	Foxler et al. 2012 (23)	Invitrogen Cat# V86420
Xpress-LIMD1 full length		N/A
Xpress-LIMD1 1-471		N/A
Xpress-LIMD1 468-676		N/A
M50 Super 8x TOPFlash	Veeman et al. 2003 (24)	Addgene Cat# 12456
