# Supplementary material
Source: Research Square preprint supplement (doi:10.21203/rs.3.rs-9917734/v1)
Supplement: Supplementary file 4 [file c2d3512b9c146d3a8cd9b790.xlsx]

## Sheet: CDGAP KO1
		UP REGULATED										DOWN REGULATED
		gene	baseMean	estimate	stderror	statistic	p.value	p.adjusted	symbol			gene	baseMean	estimate	stderror	statistic	p.value	p.adjusted	symbol
	1	ENSG00000099399	1030.97	6.94194	0.188823	36.7642	6.90384e-296	1.95475e-292	MAGEB2		1	ENSG00000125352	692.821	-1.00054	0.0962791	-10.392	2.69531e-25	3.23643e-24	RNF113A
	2	ENSG00000163395	955.875	5.42844	0.30096	18.0371	9.96608e-73	8.06228e-71	IGFN1		2	ENSG00000171310	5125.27	-1.00084	0.0502084	-19.9337	2.0765e-88	2.79972e-86	CHST11
	3	ENSG00000162458	737.32	5.26071	0.15574	33.7788	4.04259e-250	7.15386e-247	FBLIM1		3	ENSG00000068366	8707.42	-1.00103	0.0874105	-11.4521	2.29649e-30	3.59639e-29	ACSL4
	4	ENSG00000178538	273.061	5.20756	0.279643	18.6222	2.12463e-77	1.97884e-75	CA8		4	ENSG00000114853	1017.29	-1.00178	0.0757696	-13.2214	6.59908e-40	1.62193e-38	ZBTB47
	5	ENSG00000115112	235.151	5.14744	0.23881	21.5546	4.79426e-103	9.69605e-101	TFCP2L1		5	ENSG00000114738	4253.91	-1.00528	0.0726575	-13.8359	1.54891e-43	4.55111e-42	MAPKAPK3
	6	ENSG00000088881	198.325	4.90008	0.261001	18.7742	1.22881e-78	1.19974e-76	EBF4		6	ENSG00000078487	144.702	-1.00814	0.190612	-5.28897	1.23008e-07	4.08786e-07	ZCWPW1
	7	ENSG00000133026	1585.53	4.87841	0.126536	38.5535	0	0	MYH10		7	ENSG00000275632	86.5952	-1.0091	0.216143	-4.66869	3.03132e-06	8.70829e-06	NA
	8	ENSG00000117983	781.502	4.77143	0.731671	6.52128	6.97113e-11	3.12114e-10	MUC5B		8	ENSG00000055147	797.217	-1.00913	0.0872123	-11.571	5.78171e-31	9.24878e-30	FAM114A2
	9	ENSG00000142494	268.295	4.55117	0.223302	20.3812	2.45558e-92	3.77865e-90	SLC47A1		9	ENSG00000255423	27.7855	-1.01099	0.365745	-2.76419	0.00570648	0.0105012	EBLN2
	10	ENSG00000165105	364.516	4.51427	0.204363	22.0895	3.99191e-108	9.57856e-106	RASEF		10	ENSG00000018610	1186.7	-1.01143	0.0852707	-11.8614	1.87793e-32	3.31082e-31	STEEP1
	11	ENSG00000042062	211.127	4.38218	0.290638	15.0778	2.26766e-51	8.91756e-50	RIPOR3		11	ENSG00000147224	3550.59	-1.01158	0.0586091	-17.2598	9.45108e-67	6.28164e-65	PRPS1
	12	ENSG00000185352	195.915	4.36437	0.229297	19.0337	8.96865e-81	9.40512e-79	HS6ST3		12	ENSG00000185909	212.824	-1.01585	0.188447	-5.39065	7.02046e-08	2.40301e-07	KLHDC8B
	13	ENSG00000182272	628.173	4.34146	0.147875	29.3589	1.83896e-189	1.62713e-186	B4GALNT4		13	ENSG00000157916	5791.32	-1.01604	0.0501094	-20.2764	2.07857e-91	3.13046e-89	RER1
	14	ENSG00000196611	2691.79	4.30654	0.383185	11.2388	2.62917e-29	3.91802e-28	MMP1		14	ENSG00000224660	117.408	-1.01727	0.192732	-5.27815	1.30496e-07	4.31946e-07	SH3BP5-AS1
	15	ENSG00000125730	345.917	4.26323	0.610866	6.979	2.97299e-12	1.50263e-11	C3		15	ENSG00000117592	9005.58	-1.01858	0.050429	-20.1983	1.01361e-90	1.46426e-88	PRDX6
	16	ENSG00000215182	1436.42	4.13652	0.692254	5.97544	2.29467e-09	8.96403e-09	MUC5AC		16	ENSG00000178035	17978.1	-1.01879	0.0540733	-18.8408	3.49476e-79	3.50888e-77	IMPDH2
	17	ENSG00000126878	582.3	4.09772	0.141774	28.9031	1.09081e-183	7.72131e-181	AIF1L		17	ENSG00000160072	2175.47	-1.01944	0.098319	-10.3687	3.44066e-25	4.09667e-24	ATAD3B
	18	ENSG00000120162	102.879	3.97547	0.324261	12.2601	1.48328e-34	2.85697e-33	MOB3B		18	ENSG00000175279	353.381	-1.01982	0.127589	-7.99299	1.31704e-15	8.76192e-15	CENPS
	19	ENSG00000077942	412.67	3.91124	0.179523	21.7868	3.09253e-105	6.63348e-103	FBLN1		19	ENSG00000131584	2446.48	-1.02046	0.0828458	-12.3176	7.28676e-35	1.42092e-33	ACAP3
	20	ENSG00000068615	182.099	3.90854	0.245119	15.9455	3.06339e-57	1.49032e-55	REEP1		20	ENSG00000213963	92.0321	-1.02053	0.228103	-4.47397	7.67797e-06	2.11267e-05	NA
	21	ENSG00000162591	1026.99	3.9076	0.283103	13.8028	2.45202e-43	7.12797e-42	MEGF6		21	ENSG00000043143	6281.45	-1.02088	0.0820346	-12.4446	1.49709e-35	3.01484e-34	JADE2
	22	ENSG00000169306	127.007	3.88475	0.258484	15.029	4.74131e-51	1.82896e-49	IL1RAPL1		22	ENSG00000139209	223.221	-1.02121	0.161292	-6.33142	2.42921e-10	1.03554e-09	SLC38A4
	23	ENSG00000183762	184.757	3.88282	0.239224	16.2309	3.04984e-59	1.60508e-57	KREMEN1		23	ENSG00000236809	41.9875	-1.02163	0.336382	-3.03712	0.00238847	0.00467878	SNX25P1
	24	ENSG00000232759	192.657	3.83614	0.252794	15.175	5.17943e-52	2.10101e-50	STEAP1B-AS1		24	ENSG00000117899	4133.89	-1.02251	0.0517994	-19.7399	9.79832e-87	1.23852e-84	MESD
	25	ENSG00000136943	173.997	3.82764	0.249057	15.3685	2.66267e-53	1.1354e-51	CTSV		25	ENSG00000100505	58.0597	-1.02254	0.267325	-3.82509	0.000130724	0.000308545	TRIM9
	26	ENSG00000161249	341.527	3.81088	0.173779	21.9295	1.3596e-106	3.05521e-104	DMKN		26	ENSG00000233058	44.8511	-1.02547	0.28854	-3.55399	0.000379439	0.000836196	ATP13A3-DT
	27	ENSG00000158457	121.346	3.8024	0.256187	14.8423	7.80253e-50	2.8691e-48	TSPAN33		27	ENSG00000169814	2293.42	-1.02741	0.0833296	-12.3295	6.28316e-35	1.2286e-33	BTD
	28	ENSG00000158856	538.188	3.80152	0.172286	22.0651	6.83725e-108	1.61325e-105	DMTN		28	ENSG00000183763	1049.7	-1.02744	0.0827267	-12.4197	2.04246e-35	4.08744e-34	TRAIP
	29	ENSG00000130675	236.423	3.76008	0.187019	20.1053	6.62515e-90	9.19532e-88	MNX1		29	ENSG00000177628	3622.54	-1.02889	0.0500167	-20.5709	4.99848e-94	7.86261e-92	GBA1
	30	ENSG00000227706	1832.73	3.6759	0.242014	15.1888	4.19403e-52	1.72101e-50	NA		30	ENSG00000125351	1549.99	-1.02961	0.0617792	-16.666	2.31526e-62	1.36004e-60	UPF3B
	31	ENSG00000138083	91.0462	3.63329	0.3145	11.5526	7.16321e-31	1.142e-29	SIX3		31	ENSG00000226200	38.0978	-1.03033	0.339045	-3.03891	0.00237436	0.00465437	SGMS1-AS1
	32	ENSG00000178773	150.587	3.58621	0.304947	11.7601	6.26716e-32	1.06384e-30	CPNE7		32	ENSG00000158710	17479.5	-1.03211	0.0678407	-15.2137	2.86702e-52	1.1799e-50	TAGLN2
	33	ENSG00000108852	241.089	3.55188	0.198256	17.9156	8.90253e-72	7.08051e-70	MPP2		33	ENSG00000139239	135.622	-1.03363	0.169892	-6.08404	1.17189e-09	4.7065e-09	RPL14P1
	34	ENSG00000185818	308.683	3.54838	0.152268	23.3036	4.07957e-120	1.17866e-117	NAT8L		34	ENSG00000171824	5461.98	-1.03397	0.048995	-21.1037	7.36011e-99	1.2707e-96	EXOSC10
	35	ENSG00000170689	590.484	3.54217	0.151409	23.3946	4.84495e-121	1.49109e-118	HOXB9		35	ENSG00000143061	2696.97	-1.0362	0.201738	-5.13636	2.80109e-07	8.94742e-07	IGSF3
	36	ENSG00000088538	347.364	3.53737	0.164909	21.4504	4.52297e-102	9.01855e-100	DOCK3		36	ENSG00000179403	336.185	-1.03812	0.180116	-5.7636	8.23368e-09	3.07314e-08	VWA1
	37	ENSG00000064692	220.404	3.52765	0.267969	13.1644	1.40607e-39	3.37385e-38	SNCAIP		37	ENSG00000153395	9585.2	-1.03973	0.0801174	-12.9776	1.63877e-38	3.71796e-37	LPCAT1
	38	ENSG00000169116	463.391	3.52601	0.185706	18.987	2.18266e-80	2.23912e-78	PARM1		38	ENSG00000233461	116.137	-1.04041	0.217742	-4.77818	1.7689e-06	5.20305e-06	NA
	39	ENSG00000149212	260.888	3.52506	0.215482	16.3589	3.757e-60	2.03785e-58	SESN3		39	ENSG00000272502	30.5169	-1.04085	0.405558	-2.56647	0.0102739	0.018086	NA
	40	ENSG00000172543	56.5544	3.50967	0.36356	9.65363	4.7444e-22	4.76357e-21	CTSW		40	ENSG00000101972	7109.13	-1.04101	0.0553565	-18.8056	6.79703e-79	6.72906e-77	STAG2
	41	ENSG00000154359	210.04	3.47466	0.211493	16.4292	1.18167e-60	6.50932e-59	LONRF1		41	ENSG00000196139	359.752	-1.04198	0.164715	-6.32593	2.51719e-10	1.07176e-09	AKR1C3
	42	ENSG00000197183	379.241	3.45294	0.186584	18.5061	1.84229e-76	1.69359e-74	NOL4L		42	ENSG00000111886	45.6559	-1.04461	0.331275	-3.15331	0.0016143	0.00325596	GABRR2
	43	ENSG00000144152	106.85	3.42254	0.331399	10.3276	5.28892e-25	6.24481e-24	FBLN7		43	ENSG00000135821	1410.06	-1.04703	0.0962201	-10.8816	1.41128e-27	1.91741e-26	GLUL
	44	ENSG00000083290	440.527	3.4167	0.18395	18.574	5.2135e-77	4.82402e-75	ULK2		44	ENSG00000143314	2355.24	-1.0498	0.0672493	-15.6106	6.16617e-55	2.7979e-53	MRPL24
	45	ENSG00000142552	109.936	3.33671	0.262349	12.7186	4.66126e-37	9.98328e-36	RCN3		45	ENSG00000085662	5108.91	-1.04987	0.0498666	-21.0536	2.12147e-98	3.53337e-96	AKR1B1
	46	ENSG00000206195	327.382	3.32795	0.247142	13.4657	2.48829e-41	6.47549e-40	DUXAP8		46	ENSG00000250303	68.4875	-1.05069	0.260499	-4.03336	5.49843e-05	0.00013611	LINC02762
	47	ENSG00000010438	134.175	3.32338	0.22097	15.04	4.01821e-51	1.56465e-49	PRSS3		47	ENSG00000103534	233.155	-1.05087	0.165219	-6.36049	2.01116e-10	8.64098e-10	TMC5
	48	ENSG00000167363	142.182	3.30932	0.240925	13.7359	6.19092e-43	1.74244e-41	FN3K		48	ENSG00000185787	15583.3	-1.05223	0.0404776	-25.9954	5.57505e-149	2.32135e-146	MORF4L1
	49	ENSG00000149596	176.927	3.30427	0.242355	13.634	2.51322e-42	6.81604e-41	JPH2		49	ENSG00000175556	629.098	-1.05266	0.125518	-8.38653	5.00706e-17	3.66899e-16	LONRF3
	50	ENSG00000170498	851.588	3.26792	0.293597	11.1306	8.90155e-29	1.28986e-27	KISS1		50	ENSG00000206573	952.994	-1.05297	0.104397	-10.0862	6.36098e-24	7.06294e-23	THUMPD3-AS1
	51	ENSG00000176842	253.035	3.26075	0.241298	13.5134	1.30409e-41	3.44439e-40	IRX5		51	ENSG00000153558	492.669	-1.05322	0.107561	-9.79186	1.22032e-22	1.26844e-21	FBXL2
	52	ENSG00000161682	190.673	3.25729	0.212751	15.3104	6.52062e-53	2.73924e-51	FAM171A2		52	ENSG00000198901	3447.39	-1.05378	0.0772826	-13.6355	2.46409e-42	6.72141e-41	PRC1
	53	ENSG00000114251	237.459	3.22089	0.247531	13.0121	1.04471e-38	2.39708e-37	WNT5A		53	ENSG00000134597	1109.19	-1.05408	0.0735899	-14.3237	1.55527e-46	5.1444e-45	RBMX2
	54	ENSG00000158220	138.142	3.20197	0.255206	12.5466	4.14911e-36	8.63809e-35	ESYT3		54	ENSG00000224903	81.6638	-1.05449	0.24681	-4.27248	1.9331e-05	5.06887e-05	RNF32-AS1
	55	ENSG00000267279	127.166	3.18089	0.235081	13.531	1.02572e-41	2.7193e-40	NA		55	ENSG00000125877	1920.36	-1.05605	0.0768778	-13.7367	6.1193e-43	1.72572e-41	ITPA
	56	ENSG00000173320	122.488	3.17157	0.272921	11.6208	3.23045e-31	5.23267e-30	STOX2		56	ENSG00000126947	1178.01	-1.0564	0.0793456	-13.3139	1.92308e-40	4.81008e-39	ARMCX1
	57	ENSG00000114923	141.707	3.15613	0.205339	15.3703	2.58977e-53	1.11101e-51	SLC4A3		57	ENSG00000105971	4591.4	-1.0574	0.0564619	-18.7277	2.94247e-78	2.81464e-76	CAV2
	58	ENSG00000152270	387.674	3.15162	0.176927	17.8131	5.59167e-71	4.27899e-69	PDE3B		58	ENSG00000203705	241.638	-1.05751	0.178084	-5.93828	2.88024e-09	1.11531e-08	TATDN3
	59	ENSG00000198435	86.685	3.14782	0.299687	10.5037	8.30511e-26	1.02866e-24	NRARP		59	ENSG00000105854	690.102	-1.05756	0.0931192	-11.357	6.84263e-30	1.04612e-28	PON2
	60	ENSG00000165757	128.351	3.11908	0.317632	9.8198	9.25289e-23	9.69602e-22	JCAD		60	ENSG00000185532	177.799	-1.05765	0.162467	-6.50992	7.51923e-11	3.35698e-10	PRKG1
	61	ENSG00000151468	185.098	3.08981	0.232291	13.3015	2.2697e-40	5.65708e-39	CCDC3		61	ENSG00000112984	8635.81	-1.05846	0.0595219	-17.7827	9.61724e-71	7.24209e-69	KIF20A
	62	ENSG00000155629	143.492	3.07815	0.279606	11.0089	3.46241e-28	4.86283e-27	PIK3AP1		62	ENSG00000105379	1518.19	-1.05931	0.0857185	-12.358	4.41129e-35	8.71e-34	ETFB
	63	ENSG00000055163	270.507	3.03496	0.188255	16.1215	1.80073e-58	9.304e-57	CYFIP2		63	ENSG00000137801	73075.2	-1.0594	0.184193	-5.75156	8.84242e-09	3.28994e-08	THBS1
	64	ENSG00000126785	103.1	3.0312	0.287971	10.526	6.55362e-26	8.18884e-25	RHOJ		64	ENSG00000164054	5486.82	-1.0598	0.0456959	-23.1925	5.41669e-119	1.53368e-116	SHISA5
	65	ENSG00000112655	2837.35	3.03013	0.066773	45.3796	0	0	PTK7		65	ENSG00000178149	1237.85	-1.05992	0.084735	-12.5086	6.69724e-36	1.3741e-34	DALRD3
	66	ENSG00000164684	401.789	3.02741	0.14957	20.2408	4.27928e-91	6.31059e-89	ZNF704		66	ENSG00000232119	1779.75	-1.0603	0.0671961	-15.7792	4.32596e-56	2.03464e-54	MCTS1
	67	ENSG00000069482	69.8084	3.01298	0.33038	9.11974	7.53071e-20	6.60956e-19	GAL		67	ENSG00000131697	914.727	-1.06096	0.0745184	-14.2376	5.35185e-46	1.73776e-44	NPHP4
	68	ENSG00000163739	354.119	3.0078	0.358182	8.39742	4.56399e-17	3.35998e-16	CXCL1		68	ENSG00000137807	10592.7	-1.06233	0.0616439	-17.2333	1.49462e-66	9.84153e-65	KIF23
	69	ENSG00000198542	244.575	2.99522	0.179656	16.672	2.09449e-62	1.23549e-60	ITGBL1		69	ENSG00000140464	4559.33	-1.06234	0.0781672	-13.5906	4.5528e-42	1.22072e-40	PML
	70	ENSG00000091129	225.165	2.991	0.206244	14.5022	1.17253e-47	4.09865e-46	NRCAM		70	ENSG00000116649	7114.62	-1.06235	0.10128	-10.4892	9.68359e-26	1.19106e-24	SRM
	71	ENSG00000249743	126.758	2.96747	0.229249	12.9443	2.53134e-38	5.6435e-37	NA		71	ENSG00000171604	831.815	-1.06243	0.264899	-4.01071	6.05353e-05	0.000148991	CXXC5
	72	ENSG00000109794	59.815	2.96567	0.343043	8.64519	5.37144e-18	4.20362e-17	FAM149A		72	ENSG00000000003	1154.49	-1.06349	0.0708263	-15.0154	5.82106e-51	2.23937e-49	TSPAN6
	73	ENSG00000090776	775.832	2.95491	0.11189	26.4089	1.08165e-153	4.93966e-151	EFNB1		73	ENSG00000143369	2155.93	-1.0646	0.0606509	-17.5529	5.64886e-69	3.99854e-67	ECM1
	74	ENSG00000054793	600.038	2.92955	0.144364	20.2928	1.48719e-91	2.26389e-89	ATP9A		74	ENSG00000183779	1362.25	-1.06601	0.098308	-10.8436	2.1383e-27	2.86937e-26	ZNF703
	75	ENSG00000110852	194.618	2.92342	0.208533	14.019	1.19301e-44	3.65573e-43	CLEC2B		75	ENSG00000272853	38.2768	-1.06705	0.369748	-2.88588	0.00390325	0.00738747	SUV39H2-DT
	76	ENSG00000115919	923.598	2.90381	0.240537	12.0722	1.48074e-33	2.71891e-32	KYNU		76	ENSG00000251503	33.4335	-1.0672	0.336262	-3.17371	0.00150502	0.00304728	CENPS-CORT
	77	ENSG00000003249	194.431	2.90183	0.216041	13.4319	3.93439e-41	1.01641e-39	DBNDD1		77	ENSG00000185483	2051.74	-1.06804	0.0627654	-17.0164	6.20246e-65	3.8682e-63	ROR1
	78	ENSG00000101210	1618.39	2.88071	0.104768	27.4959	1.96371e-166	1.15834e-163	EEF1A2		78	ENSG00000258311	70.1558	-1.06845	0.287655	-3.71434	0.000203736	0.00046694	NA
	79	ENSG00000125538	322.062	2.88038	0.168672	17.0768	2.20749e-65	1.38895e-63	IL1B		79	ENSG00000100292	745.43	-1.07084	0.0958892	-11.1674	5.88615e-29	8.63526e-28	HMOX1
	80	ENSG00000129514	129.775	2.84465	0.221644	12.8343	1.05289e-37	2.28967e-36	FOXA1		80	ENSG00000279118	48.0573	-1.07166	0.33656	-3.18417	0.00145168	0.00294775	NA
	81	ENSG00000175445	282.435	2.81642	0.165348	17.0333	4.65268e-65	2.91451e-63	LPL		81	ENSG00000164051	1117.99	-1.07195	0.0774198	-13.846	1.34583e-43	3.96935e-42	CCDC51
	82	ENSG00000084710	146.387	2.80393	0.223501	12.5455	4.21e-36	8.75198e-35	EFR3B		82	ENSG00000143819	1166.01	-1.07236	0.0800037	-13.4039	5.73925e-41	1.46927e-39	EPHX1
	83	ENSG00000110811	310.933	2.79602	0.151608	18.4424	6.00539e-76	5.3809e-74	P3H3		83	ENSG00000144645	4872.55	-1.07305	0.0495295	-21.6648	4.40944e-104	9.04702e-102	OSBPL10
	84	ENSG00000116852	107.283	2.78849	0.31306	8.9072	5.23377e-19	4.35338e-18	KIF21B		84	ENSG00000214954	53.7806	-1.07718	0.277279	-3.88483	0.000102401	0.000245419	LRRC69
	85	ENSG00000139998	714.996	2.78107	0.100249	27.7416	2.19956e-169	1.35388e-166	RAB15		85	ENSG00000218336	4139.59	-1.07794	0.0814115	-13.2406	5.11336e-40	1.25895e-38	TENM3
	86	ENSG00000174080	620.313	2.77701	0.152883	18.1643	9.8955e-74	8.33873e-72	CTSF		86	ENSG00000068001	1357.63	-1.07796	0.0751585	-14.3425	1.18625e-46	3.95148e-45	HYAL2
	87	ENSG00000073150	181.19	2.73966	0.221152	12.3881	3.03046e-35	6.02559e-34	PANX2		87	ENSG00000126001	11069.1	-1.07901	0.0678124	-15.9117	5.25344e-57	2.54702e-55	CEP250
	88	ENSG00000204642	175.308	2.73374	0.24227	11.2839	1.57618e-29	2.3713e-28	HLA-F		88	ENSG00000257636	38.9308	-1.07906	0.357957	-3.0145	0.00257406	0.00501319	G2E3-AS1
	89	ENSG00000169429	1090.51	2.72958	0.278613	9.79702	1.15958e-22	1.20618e-21	CXCL8		89	ENSG00000162441	2138.33	-1.07937	0.0679425	-15.8864	7.86653e-57	3.78798e-55	LZIC
	90	ENSG00000163347	362.823	2.72255	0.153586	17.7266	2.61484e-70	1.93813e-68	CLDN1		90	ENSG00000140332	4032.47	-1.07994	0.181954	-5.93522	2.93445e-09	1.13536e-08	TLE3
	91	ENSG00000099889	159.518	2.71334	0.211136	12.8512	8.47322e-38	1.85116e-36	ARVCF		91	ENSG00000143641	9866.56	-1.07997	0.0752162	-14.3581	9.47407e-47	3.1783e-45	GALNT2
	92	ENSG00000226887	94.5569	2.71297	0.287755	9.42805	4.17782e-21	3.96683e-20	ERVMER34-1		92	ENSG00000142657	6686.92	-1.08019	0.0642109	-16.8225	1.67028e-63	1.01052e-61	PGD
	93	ENSG00000146966	251.327	2.69065	0.180109	14.939	1.83774e-50	6.88277e-49	DENND2A		93	ENSG00000251432	30.2393	-1.0813	0.395954	-2.73087	0.00631665	0.0115342	LINC02615
	94	ENSG00000163638	325.995	2.68921	0.162454	16.5536	1.5082e-61	8.54065e-60	ADAMTS9		94	ENSG00000143368	5197.11	-1.08207	0.0602075	-17.9723	3.21053e-72	2.58247e-70	SF3B4
	95	ENSG00000240225	337.617	2.68274	0.152762	17.5616	4.85126e-69	3.45122e-67	ZNF542P		95	ENSG00000225880	26.1679	-1.08599	0.449778	-2.41451	0.0157564	0.0268138	LINC00115
	96	ENSG00000126882	57.1764	2.66805	0.317824	8.39473	4.66977e-17	3.43606e-16	FAM78A		96	ENSG00000232995	44.4575	-1.09057	0.315298	-3.45884	0.000542513	0.00117061	RGS5
	97	ENSG00000136167	1529.51	2.66109	0.131932	20.1702	1.79089e-90	2.56097e-88	LCP1		97	ENSG00000260274	36.4188	-1.09233	0.339092	-3.22134	0.0012759	0.00261328	NA
	98	ENSG00000204681	481.641	2.64654	0.147314	17.9653	3.64243e-72	2.91332e-70	GABBR1		98	ENSG00000119285	4522.25	-1.0927	0.0767001	-14.2464	4.71923e-46	1.53587e-44	HEATR1
	99	ENSG00000198133	107.695	2.64556	0.25058	10.5577	4.67843e-26	5.85094e-25	TMEM229B		99	ENSG00000102385	80.4256	-1.09302	0.231796	-4.71545	2.4118e-06	7.00099e-06	DRP2
	100	ENSG00000115008	81.398	2.62043	0.295388	8.87114	7.23992e-19	5.95905e-18	IL1A		100	ENSG00000008128	496.174	-1.09317	0.108857	-10.0423	9.93745e-24	1.09567e-22	CDK11A
	101	ENSG00000157111	177.958	2.61814	0.20798	12.5884	2.44498e-36	5.15084e-35	TMEM171		101	ENSG00000198225	28.1486	-1.09364	0.37671	-2.90312	0.00369464	0.00702552	FKBP1C
	102	ENSG00000183638	54.6012	2.61741	0.417337	6.27169	3.5716e-10	1.49995e-09	RP1L1		102	ENSG00000166681	3314.78	-1.09708	0.0612974	-17.8977	1.22823e-71	9.71402e-70	BEX3
	103	ENSG00000027869	86.6011	2.60863	0.273803	9.52739	1.61285e-21	1.57145e-20	SH2D2A		103	ENSG00000060971	1662.93	-1.09831	0.0619023	-17.7426	1.96688e-70	1.46553e-68	ACAA1
	104	ENSG00000147676	321.85	2.59797	0.22954	11.3181	1.06724e-29	1.61765e-28	MAL2		104	ENSG00000149403	416.371	-1.0989	0.147311	-7.4597	8.67207e-14	4.94444e-13	GRIK4
	105	ENSG00000149591	836.123	2.59747	0.281091	9.24068	2.44947e-20	2.21579e-19	TAGLN		105	ENSG00000241322	87.436	-1.10047	0.250172	-4.39885	1.08826e-05	2.93962e-05	FBXW10B
	106	ENSG00000196839	56.1786	2.58546	0.298614	8.65818	4.7934e-18	3.76583e-17	ADA		106	ENSG00000113369	1216.18	-1.10175	0.106881	-10.3082	6.46944e-25	7.60696e-24	ARRDC3
	107	ENSG00000070182	66.6722	2.57754	0.340086	7.57906	3.4807e-14	2.05746e-13	SPTB		107	ENSG00000277945	95.2685	-1.10647	0.216336	-5.1146	3.14415e-07	9.97797e-07	NA
	108	ENSG00000198934	82.9138	2.56321	0.251598	10.1877	2.25043e-24	2.5467e-23	MAGEE1		108	ENSG00000041982	4322.38	-1.11002	0.0875511	-12.6786	7.77202e-37	1.65456e-35	TNC
	109	ENSG00000150510	72.9137	2.55025	0.271307	9.39989	5.46206e-21	5.15166e-20	FAM124A		109	ENSG00000089127	96.4993	-1.11005	0.262411	-4.23021	2.33476e-05	6.06703e-05	OAS1
	110	ENSG00000132359	1053.04	2.5487	0.0881488	28.9136	8.05737e-184	6.00359e-181	RAP1GAP2		110	ENSG00000162909	38397.7	-1.1127	0.0503453	-22.1013	3.07361e-108	7.50226e-106	CAPN2
	111	ENSG00000260077	69.0992	2.5306	0.288921	8.7588	1.97345e-18	1.58649e-17	NA		111	ENSG00000167693	3964.32	-1.11474	0.0664099	-16.7857	3.10291e-63	1.86135e-61	NXN
	112	ENSG00000099822	295.983	2.52176	0.221785	11.3703	5.87784e-30	9.00569e-29	HCN2		112	ENSG00000125676	5437.21	-1.11476	0.0483084	-23.0758	8.09833e-118	2.20477e-115	THOC2
	113	ENSG00000162415	65.6965	2.51886	0.282267	8.92367	4.51068e-19	3.75855e-18	ZSWIM5		113	ENSG00000185614	50.6965	-1.11488	0.315019	-3.53909	0.000401513	0.000881685	INKA1
	114	ENSG00000135678	162.999	2.51561	0.225591	11.1512	7.06473e-29	1.03215e-27	CPM		114	ENSG00000163634	2802.2	-1.11586	0.0650391	-17.1568	5.59188e-66	3.59837e-64	THOC7
	115	ENSG00000165929	99.843	2.51342	0.280379	8.96437	3.12064e-19	2.6297e-18	TC2N		115	ENSG00000189143	1538.16	-1.11696	0.101976	-10.9531	6.42034e-28	8.85894e-27	CLDN4
	116	ENSG00000139973	276.301	2.51254	0.187437	13.4047	5.67318e-41	1.45499e-39	SYT16		116	ENSG00000279821	53.2713	-1.11704	0.292094	-3.82424	0.000131176	0.000309562
	117	ENSG00000196814	273.256	2.49622	0.173778	14.3644	8.65092e-47	2.91598e-45	MVB12B		117	ENSG00000116711	179.212	-1.12072	0.178236	-6.28788	3.21838e-10	1.35765e-09	PLA2G4A
	118	ENSG00000196335	52.2517	2.47466	0.355699	6.95719	3.47137e-12	1.75077e-11	STK31		118	ENSG00000081923	1890.27	-1.12289	0.115787	-9.69782	3.08016e-22	3.13035e-21	ATP8B1
	119	ENSG00000143878	1031.84	2.46135	0.233079	10.5601	4.55976e-26	5.71262e-25	RHOB		119	ENSG00000167552	2221.5	-1.1231	0.240067	-4.67829	2.89282e-06	8.32731e-06	TUBA1A
	120	ENSG00000180066	100.547	2.45664	0.350886	7.00124	2.5371e-12	1.28876e-11	LINC02870		120	ENSG00000153363	545.098	-1.1238	0.10456	-10.7479	6.064e-27	8.00075e-26	LINC00467
	121	ENSG00000149328	391.809	2.45282	0.139495	17.5836	3.29183e-69	2.37767e-67	GLB1L2		121	ENSG00000005022	19688.6	-1.12474	0.0577371	-19.4803	1.613e-84	1.88721e-82	SLC25A5
	122	ENSG00000123191	116.877	2.44419	0.267211	9.14704	5.85172e-20	5.18346e-19	ATP7B		122	ENSG00000077721	4313.07	-1.12637	0.053293	-21.1354	3.76313e-99	6.57712e-97	UBE2A
	123	ENSG00000130707	406.308	2.43975	0.152862	15.9604	2.41128e-57	1.1853e-55	ASS1		123	ENSG00000204219	545.946	-1.12683	0.176763	-6.37483	1.83166e-10	7.91541e-10	TCEA3
	124	ENSG00000170577	239.921	2.42887	0.147186	16.5021	3.54511e-61	1.97591e-59	SIX2		124	ENSG00000169372	486.788	-1.12954	0.117031	-9.65166	4.83685e-22	4.85168e-21	CRADD
	125	ENSG00000187140	46.4007	2.42277	0.341244	7.09982	1.24918e-12	6.50651e-12	FOXD3		125	ENSG00000260238	45.0854	-1.12955	0.328941	-3.43389	0.000594987	0.00127702	PMF1-BGLAP
	126	ENSG00000136114	84.8029	2.41995	0.279581	8.65564	4.90173e-18	3.84454e-17	THSD1		126	ENSG00000215105	43.309	-1.13023	0.323463	-3.49416	0.000475562	0.00103355	TTC3P1
	127	ENSG00000153162	71.1815	2.41048	0.31485	7.65598	1.91845e-14	1.15572e-13	BMP6		127	ENSG00000218283	848.852	-1.13229	0.0933167	-12.1338	6.99359e-34	1.30618e-32	MORF4L1P1
	128	ENSG00000104870	211.832	2.40094	0.194205	12.3629	4.14878e-35	8.20311e-34	FCGRT		128	ENSG00000198246	359.06	-1.1345	0.14119	-8.03533	9.33284e-16	6.26779e-15	SLC29A3
	129	ENSG00000177932	387.351	2.39353	0.152605	15.6845	1.93057e-55	8.90262e-54	ZNF354C		129	ENSG00000124602	57.7374	-1.13663	0.2674	-4.25068	2.13121e-05	5.56568e-05	UNC5CL
	130	ENSG00000164619	138.607	2.38954	0.29934	7.9827	1.43169e-15	9.48898e-15	BMPER		130	ENSG00000164442	4670.85	-1.13709	0.0652351	-17.4306	4.83444e-68	3.33859e-66	CITED2
	131	ENSG00000151150	185.698	2.38845	0.174665	13.6745	1.44278e-42	3.98156e-41	ANK3		131	ENSG00000138621	920.246	-1.13722	0.0903333	-12.5891	2.42291e-36	5.11194e-35	PPCDC
	132	ENSG00000121753	83.819	2.3874	0.264433	9.02837	1.74245e-19	1.49141e-18	ADGRB2		132	ENSG00000134049	1731.13	-1.13901	0.065394	-17.4176	6.06657e-68	4.149e-66	IER3IP1
	133	ENSG00000067141	1534.09	2.38506	0.0879919	27.1054	8.4954e-162	4.62574e-159	NEO1		133	ENSG00000114405	784.958	-1.14167	0.0917806	-12.4392	1.60188e-35	3.21216e-34	C3orf14
	134	ENSG00000277631	69.9862	2.38269	0.272644	8.73917	2.34831e-18	1.88464e-17	PGM5P3-AS1		134	ENSG00000157303	308.105	-1.14393	0.15872	-7.2072	5.71125e-13	3.05918e-12	SUSD3
	135	ENSG00000248334	69.9718	2.37972	0.326105	7.29742	2.93333e-13	1.61083e-12	WHAMMP2		135	ENSG00000188846	33613.9	-1.14411	0.0443499	-25.7974	9.4794e-147	3.83428e-144	RPL14
	136	ENSG00000159403	197.375	2.35496	0.203713	11.5602	6.55728e-31	1.04658e-29	C1R		136	ENSG00000165698	35.7781	-1.14414	0.37492	-3.05169	0.0022756	0.00447671	SPACA9
	137	ENSG00000137103	72.7309	2.34875	0.327086	7.18084	6.92821e-13	3.68732e-12	TMEM8B		137	ENSG00000255441	18.7893	-1.14462	0.485615	-2.35705	0.0184207	0.030924	SIGLEC10-AS1
	138	ENSG00000177679	77.9309	2.33957	0.268038	8.72851	2.58041e-18	2.0674e-17	SRRM3		138	ENSG00000250802	63.4531	-1.14956	0.29146	-3.94416	8.00794e-05	0.000194224	ZBED3-AS1
	139	ENSG00000112782	193.905	2.33301	0.206784	11.2824	1.60374e-29	2.40766e-28	CLIC5		139	ENSG00000182600	66.0599	-1.15057	0.315763	-3.64378	0.000268664	0.00060565	SNORC
	140	ENSG00000134709	181.736	2.32452	0.177478	13.0975	3.40115e-39	7.98509e-38	HOOK1		140	ENSG00000103196	659.254	-1.15074	0.151373	-7.60205	2.91475e-14	1.73088e-13	CRISPLD2
	141	ENSG00000155893	143.324	2.30953	0.208884	11.0565	2.03942e-28	2.90756e-27	PXYLP1		141	ENSG00000101811	2248.36	-1.15084	0.0736274	-15.6306	4.50874e-55	2.05242e-53	CSTF2
	142	ENSG00000156265	101.267	2.30633	0.246417	9.35946	8.01448e-21	7.48878e-20	MAP3K7CL		142	ENSG00000180667	1645.4	-1.15112	0.0938599	-12.2642	1.41002e-34	2.72328e-33	YOD1
	143	ENSG00000109265	602.015	2.30478	0.111447	20.6805	5.19422e-95	8.26231e-93	CRACD		143	ENSG00000167220	389.804	-1.15116	0.122144	-9.4246	4.31744e-21	4.09116e-20	HDHD2
	144	ENSG00000204789	53.553	2.29823	0.331204	6.93903	3.94811e-12	1.97993e-11	ZNF204P		144	ENSG00000101255	1865.26	-1.15164	0.0824237	-13.9722	2.30325e-44	6.98227e-43	TRIB3
	145	ENSG00000128203	66.3947	2.29538	0.296548	7.74035	9.91431e-15	6.09717e-14	ASPHD2		145	ENSG00000203709	108.516	-1.15351	0.230072	-5.01369	5.33964e-07	1.65738e-06	MIR29B2CHG
	146	ENSG00000212724	215.977	2.29268	0.60609	3.78274	0.000155111	0.000361346	KRTAP2-3		146	ENSG00000246334	145.894	-1.15731	0.209943	-5.5125	3.53782e-08	1.24003e-07	PRR7-AS1
	147	ENSG00000139044	47.0202	2.28509	0.38668	5.90952	3.43109e-09	1.31959e-08	B4GALNT3		147	ENSG00000167306	670.635	-1.15961	0.0989006	-11.725	9.49018e-32	1.59753e-30	MYO5B
	148	ENSG00000150764	167.605	2.28368	0.214162	10.6633	1.51057e-26	1.94057e-25	DIXDC1		148	ENSG00000153234	101.867	-1.16167	0.327603	-3.54596	0.000391182	0.000860468	NR4A2
	149	ENSG00000186642	372.107	2.28216	0.123823	18.4308	7.43431e-76	6.61934e-74	PDE2A		149	ENSG00000106665	1816.15	-1.16251	0.118104	-9.84315	7.33802e-23	7.75256e-22	CLIP2
	150	ENSG00000198963	92.9065	2.27268	0.274386	8.2828	1.20315e-16	8.60253e-16	RORB		150	ENSG00000203995	320.227	-1.16409	0.128461	-9.06185	1.28256e-19	1.11053e-18	ZYG11A
	151	ENSG00000171227	45.3335	2.27066	0.427156	5.31577	1.06209e-07	3.55798e-07	TMEM37		151	ENSG00000173473	8640.55	-1.16433	0.0466901	-24.9373	2.93087e-137	1.03731e-134	SMARCC1
	152	ENSG00000184254	472.945	2.26192	0.131889	17.1502	6.26368e-66	4.01244e-64	ALDH1A3		152	ENSG00000160799	1505.73	-1.1663	0.0681816	-17.1059	1.3422e-65	8.55923e-64	CCDC12
	153	ENSG00000124171	480.786	2.26163	0.180186	12.5517	3.8929e-36	8.11661e-35	PARD6B		153	ENSG00000227627	41.1538	-1.16693	0.347044	-3.36249	0.000772418	0.00163005	NA
	154	ENSG00000214407	46.7203	2.2548	0.341868	6.59552	4.23774e-11	1.93966e-10	RDUR		154	ENSG00000139174	1158.72	-1.16779	0.0786526	-14.8475	7.22028e-50	2.66191e-48	PRICKLE1
	155	ENSG00000177283	817.335	2.25327	0.106994	21.0597	1.86202e-98	3.13817e-96	FZD8		155	ENSG00000177352	1071.08	-1.16807	0.0696793	-16.7635	4.51594e-63	2.68623e-61	CCDC71
	156	ENSG00000164690	79.662	2.25134	0.361053	6.23548	4.50406e-10	1.87486e-09	SHH		156	ENSG00000144810	3743.67	-1.17101	0.17023	-6.87901	6.02704e-12	2.97299e-11	COL8A1
	157	ENSG00000232803	853.085	2.24983	0.29553	7.61284	2.68133e-14	1.59696e-13	SLCO4A1-AS1		157	ENSG00000137642	608.077	-1.17313	0.129377	-9.06752	1.21757e-19	1.05619e-18	SORL1
	158	ENSG00000136237	177.694	2.24167	0.189204	11.8479	2.20678e-32	3.86172e-31	RAPGEF5		158	ENSG00000067606	690.964	-1.17382	0.0870735	-13.4808	2.0283e-41	5.29791e-40	PRKCZ
	159	ENSG00000250510	66.9203	2.23927	0.33052	6.77499	1.24416e-11	5.99919e-11	GPR162		159	ENSG00000077420	2448.38	-1.17544	0.0981801	-11.9723	4.96526e-33	8.95454e-32	APBB1IP
	160	ENSG00000020181	51.5847	2.23507	0.363894	6.1421	8.14361e-10	3.31576e-09	ADGRA2		160	ENSG00000169371	870.26	-1.17621	0.091803	-12.8123	1.3993e-37	3.02441e-36	SNUPN
	161	ENSG00000276141	116.495	2.23403	0.219242	10.1898	2.20253e-24	2.4945e-23	WHAMMP3		161	ENSG00000140575	34847.2	-1.17633	0.0377259	-31.1808	1.93831e-213	2.28672e-210	IQGAP1
	162	ENSG00000198185	120.163	2.23112	0.207149	10.7706	4.73951e-27	6.28251e-26	ZNF334		162	ENSG00000171388	168.708	-1.18043	0.177438	-6.65266	2.87852e-11	1.34094e-10	APLN
	163	ENSG00000198795	212.39	2.22711	0.179321	12.4197	2.04415e-35	4.08744e-34	ZNF521		163	ENSG00000101901	1016.41	-1.18284	0.088233	-13.4059	5.58341e-41	1.43456e-39	ALG13
	164	ENSG00000124374	134.137	2.22325	0.21689	10.2506	1.17627e-24	1.36384e-23	PAIP2B		164	ENSG00000188015	339.565	-1.18339	0.167942	-7.04644	1.83556e-12	9.4289e-12	S100A3
	165	ENSG00000204792	159.761	2.22291	0.282758	7.86151	3.79532e-15	2.42247e-14	LINC01291		165	ENSG00000124479	57.4794	-1.18394	0.301949	-3.921	8.81815e-05	0.000212962	NDP
	166	ENSG00000125170	85.8055	2.22017	0.321554	6.90449	5.03844e-12	2.50718e-11	DOK4		166	ENSG00000107485	289.27	-1.1856	0.13113	-9.04142	1.54655e-19	1.33097e-18	GATA3
	167	ENSG00000107902	110.809	2.20496	0.272335	8.09649	5.65677e-16	3.85942e-15	LHPP		167	ENSG00000223749	725.378	-1.18622	0.108974	-10.8854	1.35325e-27	1.84211e-26	MIR503HG
	168	ENSG00000095752	8472.11	2.19007	0.157026	13.9472	3.27339e-44	9.85986e-43	IL11		168	ENSG00000170049	73.4147	-1.18655	0.267979	-4.42777	9.52145e-06	2.58873e-05	KCNAB3
	169	ENSG00000239605	60.1272	2.1872	0.322117	6.7901	1.12059e-11	5.41996e-11	STPG4		169	ENSG00000180535	44.4906	-1.18825	0.332573	-3.57291	0.00035304	0.000781668	BHLHA15
	170	ENSG00000253368	154.121	2.1871	0.188984	11.5729	5.65345e-31	9.05384e-30	TRNP1		170	ENSG00000143507	703.925	-1.19469	0.127431	-9.37518	6.90563e-21	6.48726e-20	DUSP10
	171	ENSG00000137727	71.7432	2.18448	0.36533	5.97948	2.23853e-09	8.75438e-09	ARHGAP20		171	ENSG00000067560	28466.1	-1.19657	0.0405453	-29.512	2.02024e-191	1.9067e-188	RHOA
	172	ENSG00000006747	57.3558	2.18352	0.333947	6.53852	6.213e-11	2.79141e-10	SCIN		172	ENSG00000171155	1176.81	-1.19907	0.0721101	-16.6284	4.34028e-62	2.50797e-60	C1GALT1C1
	173	ENSG00000177096	74.4559	2.18181	0.304676	7.16109	8.00358e-13	4.23576e-12	PHETA2		173	ENSG00000080819	4406.81	-1.19977	0.0758119	-15.8256	2.07165e-56	9.84175e-55	CPOX
	174	ENSG00000144893	219.092	2.17632	0.174296	12.4864	8.85891e-36	1.81236e-34	MED12L		174	ENSG00000170915	244.025	-1.20174	0.390201	-3.0798	0.00207143	0.00410488	PAQR8
	175	ENSG00000022556	785.665	2.17238	0.101513	21.3999	1.33809e-101	2.59498e-99	NLRP2		175	ENSG00000074800	112269	-1.20429	0.0495185	-24.32	1.20557e-130	4.06364e-128	ENO1
	176	ENSG00000152527	327.653	2.16788	0.125755	17.2389	1.35599e-66	8.97042e-65	PLEKHH2		176	ENSG00000243224	19.5407	-1.20608	0.469456	-2.56909	0.0101965	0.0179631	TWF2-DT
	177	ENSG00000135114	684.342	2.16659	0.143749	15.072	2.47553e-51	9.70807e-50	OASL		177	ENSG00000172465	984.491	-1.20698	0.1035	-11.6617	2.00024e-31	3.2889e-30	TCEAL1
	178	ENSG00000184058	193.4	2.15741	0.163305	13.2109	7.58829e-40	1.8554e-38	TBX1		178	ENSG00000168209	3495.49	-1.20894	0.558684	-2.16391	0.0304714	0.0487935	DDIT4
	179	ENSG00000244486	438.489	2.15648	0.145975	14.773	2.18878e-49	7.88463e-48	SCARF2		179	ENSG00000196275	26.6203	-1.21195	0.408581	-2.96624	0.00301466	0.00580976	GTF2IRD2
	180	ENSG00000131459	2471.12	2.15216	0.17745	12.1282	7.48368e-34	1.38855e-32	GFPT2		180	ENSG00000026751	1182.82	-1.21413	0.13436	-9.03643	1.61868e-19	1.39052e-18	SLAMF7
	181	ENSG00000206337	64.2302	2.14757	0.346217	6.20296	5.54095e-10	2.28965e-09	HCP5		181	ENSG00000258725	45.5091	-1.21643	0.357583	-3.40181	0.0006694	0.00142592	PRC1-AS1
	182	ENSG00000230836	203.505	2.14705	0.263142	8.15928	3.37033e-16	2.34235e-15	LINC01293		182	ENSG00000131389	5337.23	-1.21722	0.0880884	-13.8182	1.97933e-43	5.7776e-42	SLC6A6
	183	ENSG00000131067	73.2111	2.14136	0.283417	7.55552	4.17198e-14	2.45277e-13	GGT7		183	ENSG00000175928	243.248	-1.21887	0.152751	-7.97946	1.4697e-15	9.70911e-15	LRRN1
	184	ENSG00000163993	156.292	2.13457	0.248718	8.5823	9.29928e-18	7.15877e-17	S100P		184	ENSG00000140543	36.5568	-1.21989	0.334509	-3.64682	0.000265504	0.000599289	DET1
	185	ENSG00000136378	131.702	2.13293	0.210565	10.1295	4.0858e-24	4.56893e-23	ADAMTS7		185	ENSG00000143554	115.281	-1.22157	0.215341	-5.67272	1.40547e-08	5.12419e-08	SLC27A3
	186	ENSG00000149260	1070.87	2.13146	0.109129	19.5315	5.92408e-85	7.10739e-83	CAPN5		186	ENSG00000006534	771.478	-1.22217	0.134608	-9.07948	1.09098e-19	9.4813e-19	ALDH3B1
	187	ENSG00000138449	127.097	2.12945	0.262632	8.1081	5.14194e-16	3.52004e-15	SLC40A1		187	ENSG00000165272	147.661	-1.22517	0.252571	-4.8508	1.22967e-06	3.68197e-06	AQP3
	188	ENSG00000125089	157.935	2.12937	0.203989	10.4386	1.65173e-25	2.01062e-24	SH3TC1		188	ENSG00000270127	113.063	-1.22672	0.211427	-5.80211	6.54854e-09	2.45909e-08	NA
	189	ENSG00000008086	175.099	2.12873	0.177872	11.9678	5.24036e-33	9.43865e-32	CDKL5		189	ENSG00000160685	791.695	-1.23194	0.132953	-9.26598	1.93288e-20	1.7586e-19	ZBTB7B
	190	ENSG00000111859	203.42	2.10861	0.213745	9.86509	5.89806e-23	6.2546e-22	NEDD9		190	ENSG00000067057	20980.9	-1.23805	0.0423069	-29.2636	3.01894e-188	2.51407e-185	PFKP
	191	ENSG00000147324	1591.38	2.10017	0.107854	19.4723	1.88433e-84	2.1866e-82	MFHAS1		191	ENSG00000165675	870.272	-1.24164	0.0875676	-14.1792	1.23188e-45	3.96358e-44	ENOX2
	192	ENSG00000235448	54.3465	2.09851	0.318456	6.58964	4.40881e-11	2.0134e-10	LURAP1L-AS1		192	ENSG00000048342	895.249	-1.24442	0.0821396	-15.15	7.5712e-52	3.05372e-50	CC2D2A
	193	ENSG00000166394	257.21	2.09788	0.150041	13.9821	2.0054e-44	6.09236e-43	CYB5R2		193	ENSG00000184371	4674.82	-1.24581	0.184141	-6.76553	1.32821e-11	6.38707e-11	CSF1
	194	ENSG00000003987	96.417	2.09575	0.27188	7.70835	1.27458e-14	7.78437e-14	MTMR7		194	ENSG00000169083	478.119	-1.24789	0.287669	-4.33794	1.43827e-05	3.82953e-05	AR
	195	ENSG00000163624	97.921	2.09219	0.231806	9.02561	1.78699e-19	1.52768e-18	CDS1		195	ENSG00000134259	242.306	-1.24842	0.161102	-7.74925	9.24403e-15	5.69709e-14	NGF
	196	ENSG00000142675	84.0133	2.08736	0.232992	8.95893	3.27856e-19	2.75785e-18	CNKSR1		196	ENSG00000161671	2029.78	-1.24871	0.0586733	-21.2824	1.65247e-100	3.16135e-98	EMC10
	197	ENSG00000158966	366.012	2.08695	0.130353	16.01	1.08889e-57	5.4089e-56	CACHD1		197	ENSG00000169174	2233.31	-1.24918	0.236454	-5.28298	1.27101e-07	4.21397e-07	PCSK9
	198	ENSG00000268119	268.805	2.08473	0.165633	12.5864	2.50813e-36	5.26038e-35	NA		198	ENSG00000163157	28.2013	-1.25017	0.374297	-3.34005	0.000837636	0.00176071	TMOD4
	199	ENSG00000082126	348.097	2.07267	0.169728	12.2117	2.69077e-34	5.12005e-33	MPP4		199	ENSG00000172456	71.7365	-1.25053	0.286323	-4.36754	1.25653e-05	3.36715e-05	FGGY
	200	ENSG00000154358	952.88	2.06643	0.118097	17.4978	1.48965e-68	1.04401e-66	OBSCN		200	ENSG00000067221	796.884	-1.25238	0.0918533	-13.6345	2.4955e-42	6.78095e-41	STOML1
	201	ENSG00000145945	220.18	2.06524	0.155884	13.2486	4.59879e-40	1.1382e-38	FAM50B		201	ENSG00000196352	8392.39	-1.25253	0.0757102	-16.5438	1.77604e-61	1.00173e-59	CD55
	202	ENSG00000071246	260.49	2.06032	0.179649	11.4686	1.89724e-30	2.99434e-29	VASH1		202	ENSG00000186416	1607.09	-1.26273	0.0790736	-15.9691	2.09926e-57	1.03913e-55	NKRF
	203	ENSG00000168685	1727.11	2.05938	0.224143	9.18778	4.01019e-20	3.59091e-19	IL7R		203	ENSG00000164418	116.051	-1.26305	0.209972	-6.01532	1.79532e-09	7.09161e-09	GRIK2
	204	ENSG00000161544	75.0139	2.05471	0.33395	6.15276	7.61464e-10	3.10664e-09	CYGB		204	ENSG00000158290	7237.3	-1.26678	0.0434111	-29.181	3.38303e-187	2.66075e-184	CUL4B
	205	ENSG00000161921	26.9912	2.04718	0.39482	5.18511	2.15893e-07	6.97841e-07	CXCL16		205	ENSG00000178977	30.6542	-1.26859	0.392397	-3.23291	0.00122536	0.00251703	LINC00324
	206	ENSG00000112139	148.384	2.04514	0.227201	9.00146	2.22734e-19	1.89498e-18	MDGA1		206	ENSG00000154493	57.3226	-1.27084	0.277285	-4.58316	4.58002e-06	1.29136e-05	C10orf90
	207	ENSG00000273820	108.976	2.04325	0.226817	9.00837	2.09134e-19	1.78141e-18	USP27X		207	ENSG00000189339	2260.49	-1.27336	0.0824375	-15.4464	7.97626e-54	3.47446e-52	SLC35E2B
	208	ENSG00000181894	180.619	2.04264	0.210886	9.68602	3.45754e-22	3.50132e-21	ZNF329		208	ENSG00000126945	3670.1	-1.27914	0.0486535	-26.2909	2.43692e-152	1.07811e-149	HNRNPH2
	209	ENSG00000153814	364.255	2.03539	0.120902	16.8351	1.35006e-63	8.20851e-62	JAZF1		209	ENSG00000198513	460.497	-1.27962	0.162421	-7.87838	3.31646e-15	2.12545e-14	ATL1
	210	ENSG00000160588	80.2756	2.03514	0.287328	7.083	1.41063e-12	7.32046e-12	MPZL3		210	ENSG00000197747	12833.4	-1.28227	0.0646835	-19.8238	1.85609e-87	2.38879e-85	S100A10
	211	ENSG00000160145	49.4111	2.03505	0.339889	5.9874	2.13224e-09	8.35717e-09	KALRN		211	ENSG00000241749	81.933	-1.28281	0.253605	-5.05828	4.23055e-07	1.3271e-06	RPSAP52
	212	ENSG00000138031	2539.47	2.02308	0.0654396	30.9152	7.45186e-210	8.11508e-207	ADCY3		212	ENSG00000196507	1894.94	-1.28575	0.0700703	-18.3495	3.33197e-75	2.87626e-73	TCEAL3
	213	ENSG00000008517	112.682	2.01302	0.242877	8.28824	1.14933e-16	8.23434e-16	IL32		213	ENSG00000269947	35.1611	-1.28603	0.375572	-3.42418	0.00061665	0.00132111	NA
	214	ENSG00000163898	410.056	2.01284	0.180912	11.1261	9.3696e-29	1.35491e-27	LIPH		214	ENSG00000248734	25.5551	-1.28919	0.430433	-2.99509	0.00274361	0.00531709	NA
	215	ENSG00000150054	84.2416	2.01087	0.251916	7.98228	1.43658e-15	9.51248e-15	MPP7		215	ENSG00000263535	19.3159	-1.28927	0.43873	-2.93863	0.00329662	0.00631276	AK4P1
	216	ENSG00000082014	305.941	2.00656	0.146368	13.709	8.97312e-43	2.49573e-41	SMARCD3		216	ENSG00000100234	16437.3	-1.29033	0.264504	-4.87831	1.07e-06	3.22504e-06	TIMP3
	217	ENSG00000239322	32.5949	2.00487	0.378014	5.30368	1.13494e-07	3.7833e-07	ATP6V1B1-AS1		217	ENSG00000163467	22.9544	-1.29091	0.412036	-3.133	0.00173029	0.00347162	TSACC
	218	ENSG00000167964	39.692	2.00437	0.431329	4.64697	3.36842e-06	9.63758e-06	RAB26		218	ENSG00000123562	11604.2	-1.29213	0.0586513	-22.0307	1.46253e-107	3.39427e-105	MORF4L2
	219	ENSG00000141738	61.7452	2.00014	0.320455	6.24155	4.33247e-10	1.80556e-09	GRB7		219	ENSG00000272455	69.0311	-1.29248	0.262177	-4.92981	8.23106e-07	2.5119e-06	MRPL20-DT
	220	ENSG00000166313	760.173	1.99357	0.113334	17.5902	2.92878e-69	2.1263e-67	APBB1		220	ENSG00000281091	56.524	-1.29275	0.315519	-4.0972	4.1817e-05	0.000105095	NA
	221	ENSG00000030304	74.2399	1.99277	0.298453	6.67699	2.43895e-11	1.14408e-10	MUSK		221	ENSG00000116761	381.899	-1.29461	0.129895	-9.96659	2.13433e-23	2.31893e-22	CTH
	222	ENSG00000119138	188.063	1.98438	0.257163	7.71643	1.19631e-14	7.3253e-14	KLF9		222	ENSG00000185222	2602.6	-1.29602	0.0652629	-19.8584	9.31962e-88	1.22165e-85	TCEAL9
	223	ENSG00000169994	96.3764	1.98421	0.26073	7.61022	2.73627e-14	1.62762e-13	MYO7B		223	ENSG00000113721	93.8377	-1.29856	0.296503	-4.37958	1.1891e-05	3.19615e-05	PDGFRB
	224	ENSG00000081052	135.862	1.98089	0.236011	8.39323	4.72976e-17	3.47479e-16	COL4A4		224	ENSG00000182871	11367.8	-1.29946	0.158269	-8.21044	2.20378e-16	1.55064e-15	COL18A1
	225	ENSG00000158106	510.177	1.97895	0.126915	15.5927	8.15945e-55	3.67877e-53	RHPN1		225	ENSG00000196517	766.728	-1.30061	0.373778	-3.47963	0.000502101	0.00108789	SLC6A9
	226	ENSG00000143845	203.597	1.9789	0.160384	12.3385	5.62005e-35	1.10198e-33	ETNK2		226	ENSG00000196440	432.76	-1.30288	0.131567	-9.90278	4.04841e-23	4.33536e-22	ARMCX4
	227	ENSG00000185904	165.834	1.97856	0.18475	10.7094	9.19688e-27	1.1989e-25	LINC00839		227	ENSG00000164197	140.57	-1.30293	0.180315	-7.22586	4.97926e-13	2.68538e-12	RNF180
	228	ENSG00000133401	590.12	1.97556	0.09941	19.8729	6.98639e-88	9.24358e-86	PDZD2		228	ENSG00000102312	1191.64	-1.30305	0.0798799	-16.3126	8.03432e-60	4.27601e-58	PORCN
	229	ENSG00000159212	643.998	1.96906	0.133009	14.804	1.38068e-49	4.99904e-48	CLIC6		229	ENSG00000092295	94.2659	-1.30576	0.229994	-5.67736	1.36786e-08	4.99608e-08	TGM1
	230	ENSG00000137965	1472.62	1.96854	0.0784638	25.0885	6.64321e-139	2.41149e-136	IFI44		230	ENSG00000172986	222.026	-1.30609	0.161987	-8.06296	7.44678e-16	5.03698e-15	GXYLT2
	231	ENSG00000187672	51.6604	1.96801	0.294711	6.67777	2.42604e-11	1.1384e-10	ERC2		231	ENSG00000104419	2704.92	-1.30877	0.353418	-3.70317	0.000212919	0.000486568	NDRG1
	232	ENSG00000259207	132.261	1.96473	0.184419	10.6536	1.67761e-26	2.14543e-25	ITGB3		232	ENSG00000125962	840.845	-1.31015	0.105035	-12.4735	1.04205e-35	2.12263e-34	ARMCX5
	233	ENSG00000166839	35.5799	1.96213	0.364529	5.38265	7.33987e-08	2.50568e-07	ANKDD1A		233	ENSG00000167173	3270.04	-1.31546	0.0668217	-19.6861	2.83635e-86	3.46157e-84	C15orf39
	234	ENSG00000260231	42.1235	1.95955	0.363585	5.38953	7.06441e-08	2.41696e-07	KDM7A-DT		234	ENSG00000131981	3215.34	-1.31945	0.0943325	-13.9872	1.86582e-44	5.69276e-43	LGALS3
	235	ENSG00000081665	523.914	1.95284	0.109325	17.8626	2.30559e-71	1.80333e-69	ZNF506		235	ENSG00000167600	309.908	-1.32031	0.160262	-8.23841	1.74513e-16	1.23405e-15	CYP2S1
	236	ENSG00000183248	60.1557	1.95177	0.367299	5.31385	1.07335e-07	3.59229e-07	PRR36		236	ENSG00000076770	1243.01	-1.32105	0.0820798	-16.0947	2.77812e-58	1.425e-56	MBNL3
	237	ENSG00000104267	231.75	1.95054	0.172925	11.2797	1.6532e-29	2.47666e-28	CA2		237	ENSG00000088832	20366.7	-1.3225	0.0526014	-25.1419	1.73501e-139	6.46381e-137	FKBP1A
	238	ENSG00000130720	266.306	1.94755	0.241546	8.06286	7.45291e-16	5.03872e-15	FIBCD1		238	ENSG00000184613	265.474	-1.32448	0.126793	-10.446	1.52835e-25	1.86686e-24	NELL2
	239	ENSG00000167994	339.315	1.9436	0.183938	10.5666	4.25557e-26	5.33623e-25	RAB3IL1		239	ENSG00000163072	50.5737	-1.32486	0.376673	-3.51727	0.000436016	0.000953163	NOSTRIN
	240	ENSG00000204650	409.524	1.93726	0.118429	16.3579	3.81897e-60	2.06355e-58	LINC02210		240	ENSG00000188315	511.529	-1.32878	0.104821	-12.6767	7.96222e-37	1.69251e-35	C3orf62
	241	ENSG00000133619	244.559	1.93444	0.156262	12.3795	3.37539e-35	6.70202e-34	KRBA1		241	ENSG00000157064	1690.8	-1.32984	0.105881	-12.5598	3.51186e-36	7.33294e-35	NMNAT2
	242	ENSG00000035664	35.8888	1.93097	0.45691	4.22616	2.37715e-05	6.17056e-05	DAPK2		242	ENSG00000146426	466.61	-1.3311	0.116568	-11.4191	3.35649e-30	5.18753e-29	TIAM2
	243	ENSG00000104290	167.887	1.92989	0.181501	10.6329	2.0941e-26	2.66602e-25	FZD3		243	ENSG00000238117	80.8173	-1.33321	0.22587	-5.90258	3.57864e-09	1.37484e-08	NA
	244	ENSG00000105825	1116.45	1.92885	0.0825289	23.3718	8.28092e-121	2.49432e-118	TFPI2		244	ENSG00000163283	110.139	-1.33593	0.229	-5.83377	5.41895e-09	2.04794e-08	ALPP
	245	ENSG00000180616	153.867	1.92604	0.203393	9.46959	2.80955e-21	2.69843e-20	SSTR2		245	ENSG00000113758	4548.87	-1.33687	0.0523306	-25.5466	5.98231e-144	2.35254e-141	DBN1
	246	ENSG00000239697	362.473	1.92137	0.117311	16.3784	2.7273e-60	1.49075e-58	TNFSF12		246	ENSG00000178537	557.992	-1.34002	0.0971477	-13.7936	2.78405e-43	8.06008e-42	SLC25A20
	247	ENSG00000137266	154.684	1.92003	0.23191	8.27923	1.23977e-16	8.85092e-16	SLC22A23		247	ENSG00000135373	1937.85	-1.34651	0.115201	-11.6884	1.46194e-31	2.42633e-30	EHF
	248	ENSG00000185112	499.941	1.91814	0.169622	11.3083	1.19378e-29	1.80752e-28	FAM43A		248	ENSG00000028137	260.314	-1.34785	0.163139	-8.26194	1.43325e-16	1.01962e-15	TNFRSF1B
	249	ENSG00000086300	301.706	1.90009	0.139965	13.5754	5.60063e-42	1.49319e-40	SNX10		249	ENSG00000174600	399.216	-1.35143	0.312194	-4.3288	1.49926e-05	3.98218e-05	CMKLR1
	250	ENSG00000121966	55.3501	1.90008	0.34717	5.47304	4.42369e-08	1.53721e-07	CXCR4		250	ENSG00000125618	151.626	-1.35385	0.193927	-6.98122	2.92637e-12	1.47959e-11	PAX8
	251	ENSG00000135750	310.486	1.89729	0.146418	12.958	2.11658e-38	4.73372e-37	KCNK1		251	ENSG00000117525	23362.1	-1.3562	0.181792	-7.46016	8.64187e-14	4.92986e-13	F3
	252	ENSG00000187957	263.713	1.88412	0.145697	12.9318	2.97806e-38	6.60821e-37	DNER		252	ENSG00000180353	457.833	-1.35981	0.148001	-9.18783	4.00841e-20	3.59091e-19	HCLS1
	253	ENSG00000227372	169.607	1.88038	0.217658	8.63911	5.6652e-18	4.42373e-17	TP73-AS1		253	ENSG00000088280	809.15	-1.36218	0.279822	-4.86801	1.12727e-06	3.39042e-06	ASAP3
	254	ENSG00000154153	231.708	1.87801	0.172299	10.8997	1.15623e-27	1.57695e-26	RETREG1		254	ENSG00000158315	105.964	-1.36238	0.267692	-5.08937	3.59255e-07	1.13425e-06	RHBDL2
	255	ENSG00000170961	1080.89	1.87263	0.0995525	18.8105	6.19285e-79	6.1741e-77	HAS2		255	ENSG00000161912	131.422	-1.36561	0.229188	-5.95847	2.54608e-09	9.89972e-09	ADCY10P1
	256	ENSG00000184979	89.5348	1.87225	0.23652	7.91582	2.45639e-15	1.59154e-14	USP18		256	ENSG00000198576	21.3547	-1.36798	0.459283	-2.97851	0.0028965	0.00559575	ARC
	257	ENSG00000204291	97.8692	1.87026	0.31343	5.96706	2.4156e-09	9.42086e-09	COL15A1		257	ENSG00000159588	119.062	-1.37077	0.198791	-6.89553	5.36634e-12	2.66099e-11	CCDC17
	258	ENSG00000278291	33.9504	1.86516	0.337766	5.52206	3.35057e-08	1.1779e-07	NA		258	ENSG00000263235	25.857	-1.37077	0.387327	-3.53904	0.000401581	0.000881696	NA
	259	ENSG00000141696	655.024	1.86504	0.11233	16.6031	6.61308e-62	3.80574e-60	P3H4		259	ENSG00000225914	47.8069	-1.37077	0.31283	-4.38184	1.1768e-05	3.16609e-05	TSBP1-AS1
	260	ENSG00000089486	513.999	1.86482	0.115011	16.2143	3.99343e-59	2.08017e-57	CDIP1		260	ENSG00000152377	171.475	-1.37781	0.181357	-7.59725	3.02496e-14	1.79482e-13	SPOCK1
	261	ENSG00000131669	689.809	1.86481	0.118958	15.6761	2.20209e-55	1.01218e-53	NINJ1		261	ENSG00000137831	9704.1	-1.37888	0.0506394	-27.2294	2.91542e-163	1.65094e-160	UACA
	262	ENSG00000184271	83.2802	1.86381	0.281067	6.63118	3.33019e-11	1.5407e-10	POU6F1		262	ENSG00000103381	1124.99	-1.37962	0.0902107	-15.2933	8.47501e-53	3.54973e-51	CPPED1
	263	ENSG00000143341	154.632	1.86202	0.20593	9.04203	1.53789e-19	1.32432e-18	HMCN1		263	ENSG00000184292	1409.38	-1.38017	0.0696499	-19.8158	2.17568e-87	2.77487e-85	TACSTD2
	264	ENSG00000177453	37.0533	1.85562	0.363526	5.1045	3.31664e-07	1.04971e-06	NIM1K		264	ENSG00000088727	210.811	-1.38117	0.149156	-9.25985	2.04727e-20	1.85909e-19	KIF9
	265	ENSG00000078081	110.711	1.85511	0.212482	8.73069	2.5313e-18	2.0292e-17	LAMP3		265	ENSG00000177191	54.1869	-1.38143	0.316948	-4.35853	1.3094e-05	3.50354e-05	B3GNT8
	266	ENSG00000157601	173.787	1.85236	0.218436	8.48011	2.24973e-17	1.69592e-16	MX1		266	ENSG00000173546	1924.71	-1.38406	0.181639	-7.61985	2.53974e-14	1.51517e-13	CSPG4
	267	ENSG00000163803	130.874	1.85111	0.222832	8.30719	9.79977e-17	7.05673e-16	PLB1		267	ENSG00000067225	171042	-1.39994	0.0572498	-24.4531	4.6621e-132	1.60979e-129	PKM
	268	ENSG00000274070	121.145	1.847	0.21231	8.69953	3.33268e-18	2.64022e-17	CASTOR2		268	ENSG00000057657	96.1416	-1.40072	0.223314	-6.27243	3.55458e-10	1.49368e-09	PRDM1
	269	ENSG00000177675	1541.48	1.84375	0.104162	17.7007	4.14023e-70	3.03695e-68	CD163L1		269	ENSG00000143367	1877.08	-1.40194	0.083423	-16.8053	2.23309e-63	1.34527e-61	TUFT1
	270	ENSG00000130584	59.817	1.8349	0.26853	6.83315	8.30719e-12	4.05534e-11	ZBTB46		270	ENSG00000075711	9355.37	-1.40344	0.0526173	-26.6725	9.80864e-157	4.6287e-154	DLG1
	271	ENSG00000122694	321.915	1.83156	0.133995	13.6688	1.55895e-42	4.28545e-41	GLIPR2		271	ENSG00000143248	113.237	-1.40364	0.209901	-6.68716	2.27542e-11	1.06914e-10	RGS5
	272	ENSG00000245680	459.718	1.82715	0.113597	16.0845	3.27881e-58	1.65779e-56	ZNF585B		272	ENSG00000279453	63.4385	-1.41073	0.264074	-5.34219	9.18306e-08	3.10126e-07	NA
	273	ENSG00000050730	44.3298	1.82625	0.375262	4.86661	1.13529e-06	3.41382e-06	TNIP3		273	ENSG00000111679	105.441	-1.41196	0.214799	-6.5734	4.91807e-11	2.233e-10	PTPN6
	274	ENSG00000112294	482.803	1.82319	0.109217	16.6933	1.46631e-62	8.68557e-61	ALDH5A1		274	ENSG00000239653	53.015	-1.41533	0.288516	-4.90553	9.31749e-07	2.82397e-06	PSMD6-AS2
	275	ENSG00000160191	82.6266	1.82275	0.249166	7.31543	2.56568e-13	1.41608e-12	PDE9A		275	ENSG00000286034	39.8316	-1.41648	0.381815	-3.70986	0.000207373	0.000474601	NA
	276	ENSG00000164744	64.0054	1.81805	0.357442	5.08628	3.65154e-07	1.1521e-06	SUN3		276	ENSG00000162745	119.738	-1.41769	0.252084	-5.62389	1.86701e-08	6.7204e-08	OLFML2B
	277	ENSG00000178343	362.733	1.81747	0.132378	13.7294	6.76624e-43	1.89308e-41	SHISA3		277	ENSG00000102287	644.305	-1.42048	0.121182	-11.7219	9.84494e-32	1.65528e-30	GABRE
	278	ENSG00000196172	175.536	1.81631	0.20582	8.82475	1.09702e-18	8.92045e-18	ZNF681		278	ENSG00000125378	4410.53	-1.42123	0.226036	-6.28761	3.22392e-10	1.35958e-09	BMP4
	279	ENSG00000124491	128.357	1.81238	0.242803	7.4644	8.36782e-14	4.78639e-13	F13A1		279	ENSG00000160789	39807.4	-1.43474	0.0415758	-34.5089	5.89339e-261	1.39055e-257	LMNA
	280	ENSG00000153246	44.1644	1.80897	0.347496	5.20573	1.9324e-07	6.27311e-07	PLA2R1		280	ENSG00000162407	1628.3	-1.43537	0.0936515	-15.3268	5.06592e-53	2.13447e-51	PLPP3
	281	ENSG00000213694	906.987	1.80753	0.122135	14.7994	1.47746e-49	5.33582e-48	S1PR3		281	ENSG00000234405	67.0989	-1.43677	0.250864	-5.72727	1.02058e-08	3.77832e-08	NA
	282	ENSG00000139292	92.2305	1.79563	0.624676	2.87449	0.00404674	0.00762948	LGR5		282	ENSG00000280010	27.6444	-1.43753	0.403272	-3.56467	0.000364307	0.000805104	NA
	283	ENSG00000230882	94.6155	1.78683	0.263924	6.77023	1.28575e-11	6.18705e-11	NA		283	ENSG00000156697	3041.03	-1.43817	0.108125	-13.3011	2.28104e-40	5.67533e-39	UTP14A
	284	ENSG00000166823	203.972	1.78068	0.187328	9.5057	1.98698e-21	1.92405e-20	MESP1		284	ENSG00000198929	174.926	-1.44899	0.163901	-8.8406	9.5205e-19	7.77288e-18	NOS1AP
	285	ENSG00000240445	141.843	1.77993	0.2103	8.46375	2.58904e-17	1.94549e-16	FOXO3B		285	ENSG00000048740	1785.13	-1.45498	0.108354	-13.428	4.14194e-41	1.06808e-39	CELF2
	286	ENSG00000143126	1094.93	1.77385	0.125434	14.1417	2.10066e-45	6.66795e-44	CELSR2		286	ENSG00000063660	1401.24	-1.45785	0.0853329	-17.0843	1.94379e-65	1.22849e-63	GPC1
	287	ENSG00000137462	153.925	1.76333	0.167563	10.5233	6.74351e-26	8.41127e-25	TLR2		287	ENSG00000223784	577.945	-1.46548	0.126017	-11.6293	2.92616e-31	4.75064e-30	LINP1
	288	ENSG00000158186	224.59	1.75939	0.16236	10.8364	2.31485e-27	3.10041e-26	MRAS		288	ENSG00000155962	29.7932	-1.47033	0.440029	-3.34145	0.000833421	0.00175211	CLIC2
	289	ENSG00000148848	193.674	1.75816	0.172083	10.2169	1.66528e-24	1.90585e-23	ADAM12		289	ENSG00000242574	52.1449	-1.47093	0.385559	-3.81506	0.00013615	0.000320232	HLA-DMB
	290	ENSG00000181754	299.81	1.75766	0.146395	12.0063	3.29266e-33	5.99155e-32	AMIGO1		290	ENSG00000069424	939.786	-1.47216	0.0993527	-14.8175	1.12835e-49	4.10644e-48	KCNAB2
	291	ENSG00000079841	64.1118	1.75595	0.28797	6.09769	1.07615e-09	4.33185e-09	RIMS1		291	ENSG00000179583	391.642	-1.4748	0.297172	-4.96276	6.9497e-07	2.13328e-06	CIITA
	292	ENSG00000225439	55.9092	1.75158	0.390839	4.48159	7.40897e-06	2.04262e-05	BOLA3-DT		292	ENSG00000108846	1536.85	-1.48399	0.307507	-4.82585	1.39404e-06	4.14785e-06	ABCC3
	293	ENSG00000198203	99.1426	1.75002	0.297099	5.89034	3.85411e-09	1.47626e-08	SULT1C2		293	ENSG00000103227	64.7231	-1.48701	0.283709	-5.24134	1.59419e-07	5.22791e-07	LMF1
	294	ENSG00000182712	85.2711	1.74725	0.258405	6.76168	1.36403e-11	6.54374e-11	CMC4		294	ENSG00000127124	2322.29	-1.49002	0.081199	-18.3503	3.28591e-75	2.8539e-73	HIVEP3
	295	ENSG00000165507	55.2729	1.74637	0.375245	4.65394	3.25644e-06	9.32849e-06	DEPP1		295	ENSG00000205090	59.1337	-1.4904	0.279634	-5.32985	9.82952e-08	3.30538e-07	TMEM240
	296	ENSG00000180787	91.2418	1.74391	0.230473	7.56665	3.8297e-14	2.25999e-13	ZFP3		296	ENSG00000250644	103.397	-1.49583	0.252085	-5.93383	2.95952e-09	1.14475e-08	NA
	297	ENSG00000138675	1554.98	1.74123	0.265891	6.54867	5.80536e-11	2.61407e-10	FGF5		297	ENSG00000147606	57.0675	-1.49889	0.329055	-4.55512	5.23553e-06	1.46655e-05	SLC26A7
	298	ENSG00000119772	494.443	1.74041	0.0974576	17.8581	2.49811e-71	1.94317e-69	DNMT3A		298	ENSG00000207954	63.0129	-1.49964	0.280556	-5.34523	9.03034e-08	3.05405e-07	MIR138-1
	299	ENSG00000273340	26.41	1.73935	0.421304	4.12849	3.65158e-05	9.24783e-05	MICE		299	ENSG00000136068	71509.2	-1.50973	0.0391837	-38.5295	0	0	FLNB
	300	ENSG00000197415	255.002	1.73674	0.147476	11.7764	5.16397e-32	8.80799e-31	VEPH1		300	ENSG00000197385	334.809	-1.51167	0.118712	-12.7339	3.83315e-37	8.22212e-36	ZNF860
	301	ENSG00000233493	243.968	1.73586	0.219263	7.91676	2.43774e-15	1.5809e-14	TMEM238		301	ENSG00000142621	18.7742	-1.52414	0.48381	-3.15028	0.00163115	0.00328761	FHAD1
	302	ENSG00000159263	188.21	1.72644	0.194014	8.89851	5.66017e-19	4.70252e-18	SIM2		302	ENSG00000223797	84.9175	-1.52605	0.231461	-6.59311	4.30698e-11	1.96881e-10	ENTPD3-AS1
	303	ENSG00000138347	57.5584	1.72313	0.306519	5.6216	1.89192e-08	6.80832e-08	MYPN		303	ENSG00000206190	1154.1	-1.5306	0.0723619	-21.152	2.64403e-99	4.73817e-97	ATP10A
	304	ENSG00000205181	142.029	1.71841	0.229019	7.50334	6.22136e-14	3.61115e-13	LINC00654		304	ENSG00000257354	159.729	-1.53253	0.220785	-6.94129	3.88545e-12	1.95058e-11	MIRLET7IHG
	305	ENSG00000170161	158.413	1.71572	0.198479	8.64437	5.41028e-18	4.23167e-17	FAM88B		305	ENSG00000006837	45.2788	-1.5374	0.347683	-4.42185	9.78604e-06	2.65965e-05	CDKL3
	306	ENSG00000107201	235.983	1.71547	0.206711	8.29888	1.05097e-16	7.54108e-16	RIGI		306	ENSG00000025708	202.604	-1.53865	0.214379	-7.17722	7.11451e-13	3.78078e-12	TYMP
	307	ENSG00000143494	71.7206	1.71537	0.295607	5.80286	6.51926e-09	2.44874e-08	VASH2		307	ENSG00000258947	533.683	-1.54536	0.11722	-13.1834	1.09322e-39	2.63658e-38	TUBB3
	308	ENSG00000105711	201.548	1.71226	0.225493	7.5934	3.11629e-14	1.84592e-13	SCN1B		308	ENSG00000187601	62.1129	-1.54831	0.249724	-6.2001	5.64289e-10	2.32837e-09	MAGEH1
	309	ENSG00000101004	575.867	1.71131	0.124155	13.7837	3.19537e-43	9.23201e-42	NINL		309	ENSG00000143194	35.1036	-1.55491	0.329481	-4.71927	2.36691e-06	6.87633e-06	MAEL
	310	ENSG00000105655	352.203	1.70986	0.125844	13.5871	4.77731e-42	1.27849e-40	ISYNA1		310	ENSG00000133019	179.435	-1.56013	0.249457	-6.2541	3.99826e-10	1.67169e-09	CHRM3
	311	ENSG00000112319	601.74	1.70713	0.113515	15.0388	4.09017e-51	1.58642e-49	EYA4		311	ENSG00000119686	109.507	-1.56034	0.201065	-7.7604	8.46641e-15	5.23859e-14	FLVCR2
	312	ENSG00000138030	437.149	1.70706	0.125552	13.5964	4.20698e-42	1.13014e-40	KHK		312	ENSG00000188707	241.24	-1.56394	0.161889	-9.6606	4.43273e-22	4.46014e-21	ZBED10P
	313	ENSG00000128408	134.836	1.70614	0.203748	8.37382	5.57809e-17	4.07477e-16	RIBC2		313	ENSG00000137460	132.731	-1.57379	0.22295	-7.05896	1.67757e-12	8.655e-12	FHDC1
	314	ENSG00000100154	981.953	1.70395	0.0956392	17.8165	5.26499e-71	4.05089e-69	TTC28		314	ENSG00000272750	30.9624	-1.57416	0.358917	-4.38585	1.15533e-05	3.11129e-05	NA
	315	ENSG00000231584	37.8047	1.6973	0.350204	4.84661	1.25586e-06	3.75643e-06	FAHD2CP		315	ENSG00000262074	87.2293	-1.58218	0.237959	-6.64896	2.9518e-11	1.37327e-10	SNORD3B-2
	316	ENSG00000165138	1669.96	1.69549	0.0801102	21.1644	2.03202e-99	3.68811e-97	ANKS6		316	ENSG00000117984	20529.1	-1.58482	0.220581	-7.18478	6.73146e-13	3.58665e-12	CTSD
	317	ENSG00000139971	108.465	1.69344	0.20997	8.06517	7.31357e-16	4.94925e-15	ARMH4		317	ENSG00000213853	2494.92	-1.59085	0.073179	-21.7392	8.74294e-105	1.84737e-102	EMP2
	318	ENSG00000162430	2686.24	1.69125	0.0649626	26.0341	2.03471e-149	8.72892e-147	SELENON		318	ENSG00000182621	308.715	-1.59597	0.149526	-10.6735	1.35417e-26	1.74599e-25	PLCB1
	319	ENSG00000139178	164.712	1.69021	0.281739	5.99921	1.98279e-09	7.7822e-09	C1RL		319	ENSG00000118257	621.488	-1.59937	0.104581	-15.2931	8.5052e-53	3.55186e-51	NRP2
	320	ENSG00000009950	26.7312	1.68991	0.523401	3.2287	0.00124354	0.00255156	MLXIPL		320	ENSG00000266709	164.214	-1.60295	0.25395	-6.31208	2.75314e-10	1.16835e-09	NA
	321	ENSG00000070731	36.285	1.68508	0.405629	4.15423	3.26384e-05	8.31943e-05	ST6GALNAC2		321	ENSG00000178585	1687.03	-1.60414	0.113159	-14.176	1.29019e-45	4.14176e-44	CTNNBIP1
	322	ENSG00000198933	115.322	1.68211	0.198557	8.47168	2.41887e-17	1.82149e-16	TBKBP1		322	ENSG00000106526	65.9371	-1.61226	0.364847	-4.41902	9.91513e-06	2.69163e-05	ACTR3C
	323	ENSG00000163412	201.573	1.68121	0.153037	10.9856	4.48211e-28	6.25771e-27	EIF4E3		323	ENSG00000136542	1965.62	-1.61267	0.11466	-14.0648	6.24745e-45	1.93959e-43	GALNT5
	324	ENSG00000135525	52.2019	1.68096	0.326235	5.15259	2.56916e-07	8.24566e-07	MAP7		324	ENSG00000138623	6900.99	-1.62863	0.162506	-10.022	1.22044e-23	1.33832e-22	SEMA7A
	325	ENSG00000115266	286.226	1.67543	0.161579	10.3691	3.42778e-25	4.08477e-24	APC2		325	ENSG00000143631	2573.88	-1.63213	0.187021	-8.72698	2.61553e-18	2.0908e-17	FLG
	326	ENSG00000106714	321.741	1.67154	0.180904	9.23992	2.46679e-20	2.23003e-19	CNTNAP3		326	ENSG00000170385	2055.75	-1.63522	0.0713025	-22.9336	2.14793e-116	5.63116e-114	SLC30A1
	327	ENSG00000121895	1191.33	1.66773	0.0887288	18.7958	8.17281e-79	8.0349e-77	TMEM156		327	ENSG00000166689	2789.27	-1.64397	0.0611089	-26.9023	2.06375e-159	1.00747e-156	PLEKHA7
	328	ENSG00000229474	64.4476	1.6665	0.286167	5.82354	5.76126e-09	2.17267e-08	PATL2		328	ENSG00000172260	679.586	-1.64803	0.114732	-14.3641	8.68994e-47	2.92217e-45	NEGR1
	329	ENSG00000278897	54.2791	1.6598	0.348083	4.7684	1.85691e-06	5.44947e-06	NA		329	ENSG00000234684	71.2793	-1.65173	0.257548	-6.41326	1.42438e-10	6.22953e-10	SDCBP2-AS1
	330	ENSG00000107140	853.424	1.65914	0.0863585	19.2122	2.92543e-82	3.16148e-80	TESK1		330	ENSG00000248445	33.2317	-1.65502	0.390138	-4.24215	2.21388e-05	5.77092e-05	SEMA6A-AS1
	331	ENSG00000139438	234.905	1.65893	0.154271	10.7534	5.714e-27	7.546e-26	FAM222A		331	ENSG00000183128	49.5247	-1.66951	0.372487	-4.48207	7.39233e-06	2.03844e-05	CALHM3
	332	ENSG00000101306	27.2656	1.65733	0.413476	4.00829	6.11593e-05	0.000150501	MYLK2		332	ENSG00000261338	41.1513	-1.66968	0.360834	-4.62728	3.70508e-06	1.05475e-05	NA
	333	ENSG00000137285	48.242	1.65624	0.352351	4.70054	2.59474e-06	7.50126e-06	TUBB2B		333	ENSG00000135480	36597	-1.66975	0.069206	-24.1272	1.29473e-128	4.26266e-126	KRT7
	334	ENSG00000188483	990.678	1.6561	0.294352	5.62626	1.84156e-08	6.63214e-08	IER5L		334	ENSG00000134247	1011.31	-1.67407	0.0859831	-19.4698	1.98062e-84	2.27965e-82	PTGFRN
	335	ENSG00000006459	228.04	1.65535	0.177184	9.34254	9.4046e-21	8.72483e-20	KDM7A		335	ENSG00000261087	44.6386	-1.6741	0.365371	-4.58191	4.60749e-06	1.29808e-05	ZNNT1
	336	ENSG00000127084	24.9035	1.65431	0.397724	4.15944	3.19035e-05	8.14239e-05	FGD3		336	ENSG00000188064	5271.11	-1.67923	0.0958023	-17.5281	8.74183e-69	6.15712e-67	WNT7B
	337	ENSG00000174130	286.8	1.65073	0.173292	9.52574	1.63867e-21	1.5955e-20	TLR6		337	ENSG00000069812	146.48	-1.68249	0.216026	-7.78836	6.78837e-15	4.24671e-14	HES2
	338	ENSG00000258701	60.8769	1.64734	0.27934	5.89725	3.69612e-09	1.41805e-08	LINC00638		338	ENSG00000058335	398.479	-1.68491	0.122501	-13.7542	4.80724e-43	1.36934e-41	RASGRF1
	339	ENSG00000148344	2348.74	1.64655	0.482169	3.41489	0.000638078	0.00136368	PTGES		339	ENSG00000224080	43.58	-1.68635	0.385345	-4.37622	1.20754e-05	3.24262e-05	UBE2FP1
	340	ENSG00000278175	242.345	1.64621	0.143845	11.4443	2.51092e-30	3.9192e-29	GLIDR		340	ENSG00000117152	63.3393	-1.68926	0.254137	-6.64704	2.99051e-11	1.39082e-10	RGS4
	341	ENSG00000119915	27.1367	1.64593	0.424315	3.87904	0.000104871	0.000250956	ELOVL3		341	ENSG00000284747	62.1244	-1.70869	0.272615	-6.26777	3.66246e-10	1.53582e-09	NA
	342	ENSG00000120324	69.2443	1.64541	0.325281	5.05841	4.22763e-07	1.32648e-06	PCDHB10		342	ENSG00000169583	112.597	-1.71063	0.203482	-8.40679	4.21397e-17	3.11363e-16	CLIC3
	343	ENSG00000100100	50.846	1.64245	0.368682	4.45493	8.39223e-06	2.29405e-05	PIK3IP1		343	ENSG00000197956	35849.2	-1.71346	0.151857	-11.2834	1.58516e-29	2.38228e-28	S100A6
	344	ENSG00000259495	118.812	1.64174	0.210435	7.80163	6.1111e-15	3.84169e-14	ARNT2-DT		344	ENSG00000101938	904.869	-1.71722	0.0870299	-19.7314	1.15864e-86	1.43885e-84	CHRDL1
	345	ENSG00000150051	102.261	1.64083	0.25501	6.43439	1.23973e-10	5.4472e-10	MKX		345	ENSG00000165949	273.449	-1.71985	0.144308	-11.9179	9.54871e-33	1.69826e-31	IFI27
	346	ENSG00000273117	45.6978	1.63613	0.323756	5.05358	4.33606e-07	1.35899e-06	INSIG1-DT		346	ENSG00000178700	289.86	-1.72426	0.144502	-11.9324	8.0185e-33	1.43331e-31	DHFR2
	347	ENSG00000146267	133.876	1.63373	0.194636	8.39376	4.70826e-17	3.46079e-16	FAXC		347	ENSG00000285407	32.4001	-1.72581	0.36776	-4.69276	2.6955e-06	7.7862e-06	NA
	348	ENSG00000114993	456.117	1.63224	0.110828	14.7277	4.28053e-49	1.52643e-47	RTKN		348	ENSG00000143195	1244.66	-1.7262	0.0884436	-19.5175	7.7908e-85	9.1912e-83	ILDR2
	349	ENSG00000163110	9863.77	1.62764	0.0802956	20.2706	2.33691e-91	3.48249e-89	PDLIM5		349	ENSG00000029534	754.744	-1.72859	0.137154	-12.6033	2.02574e-36	4.28037e-35	ANK1
	350	ENSG00000230778	30.9171	1.61442	0.384332	4.2006	2.66209e-05	6.86596e-05	ANKRD63		350	ENSG00000250072	116.229	-1.73467	0.22814	-7.60352	2.88176e-14	1.71272e-13	SH3TC2-DT
	351	ENSG00000197461	766.981	1.60953	0.110244	14.5997	2.82153e-48	9.96121e-47	PDGFA		351	ENSG00000272084	135.242	-1.74179	0.191464	-9.09721	9.26779e-20	8.07907e-19	NA
	352	ENSG00000213366	52.531	1.60654	0.373126	4.30562	1.66521e-05	4.39739e-05	GSTM2		352	ENSG00000172340	2919.16	-1.74558	0.0723964	-24.1115	1.89534e-128	6.09827e-126	SUCLG2
	353	ENSG00000254860	81.8448	1.59949	0.249558	6.40929	1.462e-10	6.38419e-10	TMEM9B-AS1		353	ENSG00000137434	155.924	-1.74922	0.188727	-9.26854	1.88708e-20	1.71914e-19	C6orf52
	354	ENSG00000214106	343.853	1.59911	0.155485	10.2846	8.26818e-25	9.64984e-24	PAXIP1-AS2		354	ENSG00000101935	1232.49	-1.75235	0.0877442	-19.9712	9.81656e-89	1.33628e-86	AMMECR1
	355	ENSG00000171872	33.2239	1.59391	0.409394	3.89334	9.88717e-05	0.000237483	KLF17		355	ENSG00000188042	6302.94	-1.75631	0.10273	-17.0964	1.57978e-65	1.00292e-63	ARL4C
	356	ENSG00000142235	43.8691	1.59095	0.350668	4.5369	5.70876e-06	1.59092e-05	LMTK3		356	ENSG00000137819	1802.07	-1.75703	0.0919378	-19.1111	2.04061e-81	2.15589e-79	PAQR5
	357	ENSG00000109255	405.186	1.58857	0.139915	11.3538	7.097e-30	1.08384e-28	NMU		357	ENSG00000237813	47.957	-1.76548	0.310211	-5.69123	1.26126e-08	4.62701e-08	NA
	358	ENSG00000196724	190.394	1.58492	0.193248	8.20147	2.37459e-16	1.66668e-15	ZNF418		358	ENSG00000127399	501.951	-1.7657	0.1128	-15.6533	3.15236e-55	1.43961e-53	LRRC61
	359	ENSG00000175155	56.9647	1.58353	0.303329	5.2205	1.78441e-07	5.81534e-07	YPEL2		359	ENSG00000204257	199.043	-1.77021	0.213683	-8.28427	1.18834e-16	8.50094e-16	HLA-DMA
	360	ENSG00000286190	61.9166	1.58341	0.32737	4.83675	1.31982e-06	3.93443e-06	NA		360	ENSG00000239887	368.913	-1.77248	0.126086	-14.0577	6.90647e-45	2.13949e-43	C1orf226
	361	ENSG00000286190	61.9166	1.58341	0.32737	4.83675	1.31982e-06	3.93443e-06	NA		361	ENSG00000167772	695.861	-1.77513	0.122969	-14.4355	3.09297e-47	1.06538e-45	ANGPTL4
	362	ENSG00000204271	607.564	1.58264	0.104578	15.1336	9.72165e-52	3.90992e-50	SPIN3		362	ENSG00000074410	525.07	-1.77953	0.167024	-10.6543	1.66474e-26	2.13089e-25	CA12
	363	ENSG00000113532	436.388	1.58188	0.144431	10.9525	6.46742e-28	8.91521e-27	ST8SIA4		363	ENSG00000147251	877.727	-1.78839	0.0954152	-18.7432	2.1994e-78	2.13266e-76	DOCK11
	364	ENSG00000106733	73.1577	1.58007	0.251324	6.287	3.23658e-10	1.36451e-09	NMRK1		364	ENSG00000271862	25.6804	-1.79139	0.429357	-4.17226	3.01598e-05	7.72102e-05	NA
	365	ENSG00000153064	236.395	1.57679	0.143827	10.9631	5.75213e-28	7.97579e-27	BANK1		365	ENSG00000168497	1470.29	-1.79281	0.120912	-14.8274	9.73861e-50	3.56252e-48	CAVIN2
	366	ENSG00000280079	153.052	1.5748	0.188834	8.33958	7.45519e-17	5.40416e-16	NA		366	ENSG00000123384	3733.41	-1.79297	0.246587	-7.27114	3.56475e-13	1.94325e-12	LRP1
	367	ENSG00000251369	252.955	1.57349	0.157444	9.99394	1.6201e-23	1.76564e-22	ZNF550		367	ENSG00000266714	68.7383	-1.79693	0.274837	-6.53815	6.22844e-11	2.79746e-10	MYO15B
	368	ENSG00000257913	35.4098	1.57168	0.372232	4.22231	2.41809e-05	6.27091e-05	DDN-AS1		368	ENSG00000261786	3614.35	-1.7974	0.0629354	-28.5595	2.14317e-179	1.44481e-176
	369	ENSG00000286523	118.911	1.57164	0.22634	6.94374	3.81849e-12	1.91764e-11	NA		369	ENSG00000198932	105.255	-1.80796	0.238847	-7.56954	3.74547e-14	2.2112e-13	GPRASP1
	370	ENSG00000204301	29.6911	1.56295	0.413949	3.77571	0.000159553	0.000371112	NOTCH4		370	ENSG00000276107	134.476	-1.83976	0.23649	-7.77944	7.28439e-15	4.53696e-14	THBS1-IT1
	371	ENSG00000197329	480.115	1.56083	0.128302	12.1653	4.75635e-34	8.94232e-33	PELI1		371	ENSG00000106852	180.095	-1.84544	0.194232	-9.50124	2.07415e-21	2.00436e-20	LHX6
	372	ENSG00000176406	253.383	1.55862	0.234339	6.65114	2.90823e-11	1.35389e-10	RIMS2		372	ENSG00000153944	1441.72	-1.84581	0.135884	-13.5837	5.00121e-42	1.33589e-40	MSI2
	373	ENSG00000196405	522.156	1.55405	0.098755	15.7364	8.51877e-56	3.96711e-54	EVL		373	ENSG00000111319	127.35	-1.85655	0.226987	-8.1791	2.85969e-16	1.99628e-15	SCNN1A
	374	ENSG00000162994	193.436	1.55305	0.16883	9.19894	3.61504e-20	3.24528e-19	CLHC1		374	ENSG00000259706	32.0727	-1.87365	0.411173	-4.55683	5.19324e-06	1.45557e-05	HSP90B2P
	375	ENSG00000176170	1728.79	1.55039	0.100825	15.377	2.33692e-53	1.00559e-51	SPHK1		375	ENSG00000184838	205.867	-1.87478	0.200367	-9.35675	8.22282e-21	7.66867e-20	PRR16
	376	ENSG00000288675	34.0636	1.54765	0.391855	3.94954	7.83017e-05	0.000190205	PANO1		376	ENSG00000101842	51.1252	-1.8803	0.368306	-5.10526	3.30348e-07	1.04578e-06	VSIG1
	377	ENSG00000138395	248.566	1.54371	0.187402	8.23744	1.75938e-16	1.24351e-15	CDK15		377	ENSG00000163701	391.225	-1.88165	0.126336	-14.894	3.60505e-50	1.33604e-48	IL17RE
	378	ENSG00000172638	126.845	1.54232	0.255012	6.04802	1.46637e-09	5.83456e-09	EFEMP2		378	ENSG00000182809	799.609	-1.88314	0.139456	-13.5035	1.49161e-41	3.91776e-40	CRIP2
	379	ENSG00000071073	231.515	1.53882	0.146578	10.4983	8.79438e-26	1.08735e-24	MGAT4A		379	ENSG00000272620	2192.79	-1.88909	0.201121	-9.39281	5.84181e-21	5.5025e-20	AFAP1-AS1
	380	ENSG00000176595	266.915	1.53654	0.170718	9.00048	2.24731e-19	1.90968e-18	KBTBD11		380	ENSG00000205362	34.1491	-1.89543	0.345695	-5.48294	4.18312e-08	1.45791e-07	MT1A
	381	ENSG00000169621	185.923	1.53629	0.198128	7.75404	8.90132e-15	5.49568e-14	APLF		381	ENSG00000115738	79.33	-1.90535	0.251301	-7.58195	3.40386e-14	2.01289e-13	ID2
	382	ENSG00000187244	1192.04	1.53469	0.111514	13.7624	4.29218e-43	1.22756e-41	BCAM		382	ENSG00000253746	62.282	-1.90604	0.27948	-6.81996	9.10655e-12	4.43486e-11	NA
	383	ENSG00000136490	499.487	1.53466	0.109286	14.0426	8.54751e-45	2.63632e-43	LIMD2		383	ENSG00000118898	736.714	-1.90681	0.619653	-3.07722	0.00208939	0.00413699	PPL
	384	ENSG00000144199	298.027	1.53337	0.133744	11.465	1.97845e-30	3.11557e-29	FAHD2B		384	ENSG00000166106	2187.78	-1.90706	0.233781	-8.15746	3.42131e-16	2.37545e-15	ADAMTS15
	385	ENSG00000197497	122.343	1.5308	0.217604	7.03478	1.99573e-12	1.02183e-11	ZNF665		385	ENSG00000116678	454.472	-1.94103	0.120658	-16.0871	3.14295e-58	1.59479e-56	LEPR
	386	ENSG00000132932	79.4239	1.53015	0.235615	6.49426	8.34408e-11	3.71235e-10	ATP8A2		386	ENSG00000168032	78.8854	-1.95605	0.253254	-7.72368	1.13018e-14	6.92941e-14	ENTPD3
	387	ENSG00000276317	35.636	1.52725	0.32553	4.69159	2.7109e-06	7.82589e-06	NA		387	ENSG00000065621	37.3137	-1.96003	0.368013	-5.32597	1.00414e-07	3.37261e-07	GSTO2
	388	ENSG00000233327	42.3628	1.52671	0.398333	3.83274	0.000126723	0.000299751	USP32P2		388	ENSG00000182578	69.496	-1.96253	0.365827	-5.36463	8.11139e-08	2.75709e-07	CSF1R
	389	ENSG00000147234	99.0354	1.52422	0.232335	6.56042	5.36547e-11	2.42371e-10	FRMPD3		389	ENSG00000143178	46.113	-1.96953	0.356683	-5.5218	3.3555e-08	1.17934e-07	TBX19
	390	ENSG00000151617	80.6726	1.52241	0.294119	5.17617	2.26485e-07	7.30374e-07	EDNRA		390	ENSG00000117069	158.923	-1.9718	0.2483	-7.9412	2.00242e-15	1.30818e-14	ST6GALNAC5
	391	ENSG00000205534	43.7105	1.51931	0.322275	4.71434	2.42497e-06	7.03491e-06	SMG1P2		391	ENSG00000099377	1296.71	-1.97799	0.0887892	-22.2774	6.11952e-110	1.5199e-107	HSD3B7
	392	ENSG00000141294	26.3844	1.51847	0.396078	3.83376	0.000126201	0.000298666	LRRC46		392	ENSG00000169129	1881.21	-1.98623	0.225587	-8.80472	1.31179e-18	1.06242e-17	AFAP1L2
	393	ENSG00000182648	356.193	1.51561	0.129354	11.7168	1.04542e-31	1.75564e-30	RNF32-DT		393	ENSG00000246985	57.6409	-2.01881	0.280225	-7.20424	5.83682e-13	3.12526e-12	SOCS2-AS1
	394	ENSG00000023445	4197.33	1.51302	0.0894653	16.9118	3.68516e-64	2.2683e-62	BIRC3		394	ENSG00000131095	78.3395	-2.01881	0.280305	-7.20218	5.92566e-13	3.16923e-12	GFAP
	395	ENSG00000119698	29.3281	1.51135	0.418784	3.6089	0.000307498	0.000686633	PPP4R4		395	ENSG00000172137	710.669	-2.02064	0.135188	-14.947	1.62998e-50	6.16997e-49	CALB2
	396	ENSG00000275793	61.229	1.50969	0.323402	4.66813	3.0395e-06	8.73001e-06	RIMBP3		396	ENSG00000145908	283.683	-2.0266	0.155554	-13.0283	8.44928e-39	1.95133e-37	ZNF300
	397	ENSG00000128645	161.161	1.50689	0.192678	7.82077	5.25003e-15	3.31955e-14	HOXD1		397	ENSG00000131746	331.077	-2.0375	0.360628	-5.64986	1.60576e-08	5.81845e-08	TNS4
	398	ENSG00000261600	47.5166	1.5063	0.311844	4.83029	1.36335e-06	4.05824e-06	NA		398	ENSG00000130755	85.9251	-2.03772	0.325738	-6.2557	3.95732e-10	1.65506e-09	GMFG
	399	ENSG00000115468	453.761	1.50338	0.135862	11.0656	1.84321e-28	2.63312e-27	EFHD1		399	ENSG00000147255	63.62	-2.04362	0.27627	-7.39717	1.39121e-13	7.82493e-13	IGSF1
	400	ENSG00000148175	1207.5	1.50235	0.100254	14.9854	9.14616e-51	3.49952e-49	STOM		400	ENSG00000198910	3516.88	-2.0473	0.257958	-7.93654	2.07895e-15	1.3563e-14	L1CAM
	401	ENSG00000147852	1059.28	1.49891	0.134113	11.1765	5.31601e-29	7.83129e-28	VLDLR		401	ENSG00000151090	567.975	-2.05231	0.121038	-16.956	1.73892e-64	1.07501e-62	THRB
	402	ENSG00000138769	99.6055	1.4987	0.208502	7.18792	6.57834e-13	3.51035e-12	CDKL2		402	ENSG00000129422	900.578	-2.05641	0.105332	-19.5232	6.9736e-85	8.29623e-83	MTUS1
	403	ENSG00000148680	971.351	1.4984	0.0939284	15.9525	2.73536e-57	1.33533e-55	HTR7		403	ENSG00000144681	1523.49	-2.07727	0.0819907	-25.3354	1.30114e-141	4.97845e-139	STAC
	404	ENSG00000234380	75.1293	1.49611	0.263022	5.68814	1.28428e-08	4.70782e-08	LINC01426		404	ENSG00000142765	150.568	-2.08572	0.196906	-10.5925	3.22965e-26	4.07506e-25	SYTL1
	405	ENSG00000188738	358.411	1.4954	0.125119	11.9519	6.34635e-33	1.14017e-31	FSIP2		405	ENSG00000120833	1064.65	-2.0964	0.10041	-20.8784	8.41927e-97	1.37002e-94	SOCS2
	406	ENSG00000144331	77.5705	1.49422	0.280602	5.32506	1.00921e-07	3.38886e-07	ZNF385B		406	ENSG00000186469	131.394	-2.09756	0.28282	-7.4166	1.20163e-13	6.791e-13	GNG2
	407	ENSG00000196787	51.1992	1.49333	0.315918	4.72696	2.27911e-06	6.63624e-06	H2AC11		407	ENSG00000185630	360.601	-2.10588	0.599385	-3.51339	0.000442425	0.000965681	PBX1
	408	ENSG00000274180	304.637	1.49187	0.151989	9.8157	9.63688e-23	1.0076e-21	NATD1		408	ENSG00000232774	282.725	-2.13296	0.166284	-12.8272	1.15457e-37	2.50309e-36	LINC03033
	409	ENSG00000135622	627.314	1.48996	0.0945639	15.7561	6.23588e-56	2.92322e-54	SEMA4F		409	ENSG00000171951	96.3069	-2.14774	0.240188	-8.94192	3.82451e-19	3.20376e-18	SCG2
	410	ENSG00000134317	84.8674	1.48985	0.29682	5.01936	5.18433e-07	1.61201e-06	GRHL1		410	ENSG00000184828	134.23	-2.14872	0.210688	-10.1986	2.01171e-24	2.2857e-23	ZBTB7C
	411	ENSG00000134716	115.56	1.4896	0.227145	6.55792	5.45646e-11	2.46324e-10	CYP2J2		411	ENSG00000253161	173.406	-2.16217	0.202188	-10.6939	1.0875e-26	1.41506e-25	LINC01605
	412	ENSG00000146592	445.958	1.48903	0.113289	13.1437	1.84965e-39	4.39355e-38	CREB5		412	ENSG00000173432	715.527	-2.19148	0.117145	-18.7074	4.30749e-78	4.0927e-76	SAA1
	413	ENSG00000170801	140.728	1.48791	0.1914	7.77381	7.61585e-15	4.73091e-14	HTRA3		413	ENSG00000140937	1492.41	-2.19324	0.123263	-17.7932	7.97822e-71	6.03998e-69	CDH11
	414	ENSG00000103490	150.4	1.48733	0.209278	7.10696	1.18624e-12	6.1946e-12	PYCARD		414	ENSG00000166145	455.958	-2.20099	0.178617	-12.3224	6.8593e-35	1.33941e-33	SPINT1
	415	ENSG00000063587	757.218	1.48576	0.0913895	16.2574	1.97856e-59	1.04517e-57	ZNF275		415	ENSG00000204287	167.838	-2.21415	0.181976	-12.1673	4.64362e-34	8.74199e-33	HLA-DRA
	416	ENSG00000063587	757.218	1.48576	0.0913895	16.2574	1.97856e-59	1.04517e-57	ZNF275		416	ENSG00000169855	3436.19	-2.23404	0.0713668	-31.3036	4.16272e-215	5.35742e-212	ROBO1
	417	ENSG00000182378	258.996	1.48043	0.233693	6.33493	2.3745e-10	1.01283e-09	PLCXD1		417	ENSG00000143416	178.811	-2.23529	0.208484	-10.7216	8.0566e-27	1.05316e-25	SELENBP1
	418	ENSG00000260442	65.8158	1.47406	0.300464	4.90595	9.29749e-07	2.81972e-06	ATP2A1-AS1		418	ENSG00000185986	114.06	-2.27768	0.285712	-7.97194	1.56199e-15	1.02948e-14	SDHAP3
	419	ENSG00000205269	488.498	1.47387	0.103133	14.291	2.48846e-46	8.17383e-45	TMEM170B		419	ENSG00000019582	3556.82	-2.29787	0.0995479	-23.0831	6.85272e-118	1.90223e-115	CD74
	420	ENSG00000180096	54.6326	1.47044	0.323451	4.54609	5.46521e-06	1.52726e-05	SEPTIN1		420	ENSG00000158292	1071.06	-2.31009	0.141779	-16.2936	1.09629e-59	5.81282e-58	GPR153
	421	ENSG00000135363	50.1025	1.46965	0.312332	4.7054	2.53363e-06	7.32911e-06	LMO2		421	ENSG00000123843	1058.82	-2.31792	0.10626	-21.8136	1.72426e-105	3.81411e-103	C4BPB
	422	ENSG00000182379	211.521	1.46769	0.215507	6.81042	9.73163e-12	4.72789e-11	NXPH4		422	ENSG00000005001	31.4511	-2.32428	0.38028	-6.11204	9.83643e-10	3.97529e-09	PRSS22
	423	ENSG00000049192	250.766	1.46713	0.225215	6.51435	7.30047e-11	3.26137e-10	ADAMTS6		423	ENSG00000196420	63.0349	-2.35971	0.266942	-8.83977	9.59129e-19	7.82165e-18	S100A5
	424	ENSG00000074964	260.219	1.46702	0.144165	10.1759	2.5397e-24	2.86718e-23	ARHGEF10L		424	ENSG00000185432	160.225	-2.42356	0.437001	-5.54589	2.92471e-08	1.03332e-07	METTL7A
	425	ENSG00000178814	228.548	1.46661	0.158116	9.27553	1.76739e-20	1.61321e-19	OPLAH		425	ENSG00000120899	111.517	-2.42403	0.223008	-10.8697	1.60758e-27	2.17576e-26	PTK2B
	426	ENSG00000056558	823.541	1.46308	0.089606	16.3279	6.25118e-60	3.33955e-58	TRAF1		426	ENSG00000134339	136.318	-2.44138	0.217625	-11.2183	3.31632e-29	4.91614e-28	SAA2
	427	ENSG00000287168	100.085	1.45719	0.217237	6.70784	1.97524e-11	9.32737e-11	NA		427	ENSG00000244242	63.5394	-2.4822	0.31615	-7.85136	4.11542e-15	2.61851e-14	IFITM10
	428	ENSG00000160190	424.864	1.45532	0.106737	13.6347	2.49123e-42	6.78095e-41	SLC37A1		428	ENSG00000197249	293.113	-2.53595	0.175725	-14.4313	3.28667e-47	1.12936e-45	SERPINA1
	429	ENSG00000146197	139.875	1.45417	0.209418	6.94385	3.81568e-12	1.91691e-11	SCUBE3		429	ENSG00000215386	40.8197	-2.6094	0.37621	-6.93603	4.03265e-12	2.02018e-11	MIR99AHG
	430	ENSG00000121104	81.4168	1.45395	0.300516	4.83819	1.31026e-06	3.90923e-06	FAM117A		430	ENSG00000196406	107.128	-2.69351	0.276202	-9.75196	1.8094e-22	1.85947e-21	SPANXD
	431	ENSG00000272556	86.0971	1.45317	0.288886	5.03024	4.89864e-07	1.52821e-06	GTF2IP13		431	ENSG00000283445	259.985	-2.70751	0.157667	-17.1723	4.28085e-66	2.78e-64	NA
	432	ENSG00000234465	188.914	1.44759	0.165975	8.72174	2.73968e-18	2.18542e-17	PINLYP		432	ENSG00000108602	254.742	-2.72245	0.181369	-15.0106	6.26133e-51	2.40221e-49	ALDH3A1
	433	ENSG00000237686	42.0238	1.44433	0.346635	4.16671	3.09023e-05	7.90164e-05	SCIRT		433	ENSG00000189337	649.999	-2.72971	0.11697	-23.3369	1.8718e-120	5.52063e-118	KAZN
	434	ENSG00000116985	256.117	1.44393	0.140869	10.2502	1.18117e-24	1.36839e-23	BMP8B		434	ENSG00000157613	2101.86	-2.87966	0.106653	-27.0002	1.47067e-160	7.4358e-158	CREB3L1
	435	ENSG00000144026	715.539	1.4438	0.0877081	16.4614	6.94918e-61	3.84295e-59	ZNF514		435	ENSG00000079308	726.692	-2.90871	0.126594	-22.9766	7.98246e-117	2.13222e-114	TNS1
	436	ENSG00000214922	66.1578	1.44334	0.334668	4.31276	1.6123e-05	4.27521e-05	HLA-F-AS1		436	ENSG00000168528	4995.18	-2.97622	0.0870686	-34.1825	4.40772e-256	8.91429e-253	SERINC2
	437	ENSG00000103034	55.6138	1.44257	0.397299	3.63094	0.000282388	0.000633962	NDRG4		437	ENSG00000142347	76.3209	-2.99571	0.306694	-9.76773	1.54884e-22	1.59701e-21	MYO1F
	438	ENSG00000178229	254.394	1.44252	0.187158	7.70751	1.28298e-14	7.8323e-14	ZNF543		438	ENSG00000255346	352.991	-2.99846	0.360914	-8.30796	9.73599e-17	7.01437e-16	NOX5
	439	ENSG00000269190	599.268	1.44173	0.102386	14.0814	4.94386e-45	1.53825e-43	FBXO17		439	ENSG00000221866	127.545	-3.01835	0.24881	-12.1312	7.22162e-34	1.34345e-32	PLXNA4
	440	ENSG00000138735	79.6844	1.44143	0.254228	5.66984	1.42934e-08	5.20719e-08	PDE5A		440	ENSG00000203930	376.467	-3.05573	0.144037	-21.2148	6.96719e-100	1.31513e-97	LINC00632
	441	ENSG00000043355	1280.98	1.4414	0.0889239	16.2094	4.32968e-59	2.24525e-57	ZIC2		441	ENSG00000196126	110.092	-3.14616	0.264393	-11.8996	1.18974e-32	2.11067e-31	HLA-DRB1
	442	ENSG00000079435	207.486	1.44095	0.166602	8.64907	5.19221e-18	4.06561e-17	LIPE		442	ENSG00000196754	1559.83	-3.2084	0.112658	-28.4791	2.12829e-178	1.36955e-175	S100A2
	443	ENSG00000073670	67.2436	1.44032	0.251163	5.7346	9.77444e-09	3.62338e-08	ADAM11		443	ENSG00000168874	654.019	-3.20931	0.107344	-29.8974	2.12892e-196	2.1528e-193	ATOH8
	444	ENSG00000139112	619.865	1.43957	0.167545	8.59215	8.53548e-18	6.5887e-17	GABARAPL1		444	ENSG00000158825	679.187	-3.3118	0.254386	-13.0188	9.56301e-39	2.20136e-37	CDA
	445	ENSG00000122547	84.0984	1.43893	0.218913	6.57307	4.92897e-11	2.23581e-10	EEPD1		445	ENSG00000175315	129.05	-3.31283	0.239953	-13.8062	2.34007e-43	6.81653e-42	CST6
	446	ENSG00000276386	45.3397	1.43846	0.331178	4.34346	1.40253e-05	3.73929e-05	CNTNAP3P2		446	ENSG00000095303	267.845	-3.69281	0.200987	-18.3734	2.1462e-75	1.88719e-73	PTGS1
	447	ENSG00000067798	2840.35	1.43817	0.195839	7.34363	2.07875e-13	1.15449e-12	NAV3		447	ENSG00000213626	221.651	-3.81603	0.192485	-19.8251	1.81001e-87	2.35085e-85	LBH
	448	ENSG00000274211	1023.9	1.43806	0.0748957	19.2008	3.64256e-82	3.87727e-80	SOCS7		448	ENSG00000231290	237.942	-3.97663	0.188729	-21.0706	1.48015e-98	2.52464e-96	APCDD1L-DT
	449	ENSG00000062282	895.364	1.43646	0.122802	11.6974	1.31401e-31	2.19111e-30	DGAT2		449	ENSG00000120594	712.461	-4.01951	0.12707	-31.6324	1.3253e-219	2.0847e-216	PLXDC2
	450	ENSG00000160219	49.4122	1.43645	0.326647	4.39758	1.09466e-05	2.95466e-05	GAB3		450	ENSG00000128422	97.8183	-4.02579	0.310238	-12.9764	1.66426e-38	3.76976e-37	KRT17
	451	ENSG00000137628	826.082	1.43613	0.12034	11.934	7.87432e-33	1.40931e-31	DDX60		451	ENSG00000198768	1357.31	-4.242	0.103314	-41.0591	0	0	APCDD1L
	452	ENSG00000160345	53.7833	1.4357	0.279463	5.13737	2.78617e-07	8.9058e-07	PIERCE1		452	ENSG00000162576	740.787	-4.56721	0.144822	-31.5367	2.72479e-218	3.85749e-215	MXRA8
	453	ENSG00000204946	586.744	1.43226	0.107526	13.3201	1.76902e-40	4.43256e-39	ZNF783		453	ENSG00000135439	227.959	-4.86631	0.402522	-12.0896	1.19936e-33	2.21373e-32	AGAP2
	454	ENSG00000178184	88.9933	1.43035	0.221082	6.4698	9.8135e-11	4.34427e-10	PARD6G		454	ENSG00000186517	718.857	-4.94854	0.183002	-27.041	4.88009e-161	2.55879e-158	ARHGAP30
	455	ENSG00000166664	61.2484	1.4302	0.292321	4.89255	9.95361e-07	3.0084e-06	CHRFAM7A		455	ENSG00000196154	6198.64	-6.45668	0.391239	-16.5032	3.48109e-61	1.9479e-59	S100A4
	456	ENSG00000203326	269.376	1.42836	0.175194	8.15301	3.54984e-16	2.46228e-15	ZNF525
	457	ENSG00000148082	1755.37	1.42535	0.0954026	14.9404	1.79944e-50	6.77518e-49	SHC3
	458	ENSG00000262003	51.242	1.42306	0.295931	4.80876	1.51872e-06	4.49613e-06	NA
	459	ENSG00000133805	550.707	1.41947	0.106173	13.3695	9.11923e-41	2.31779e-39	AMPD3
	460	ENSG00000075213	1857.19	1.41113	0.0658816	21.4192	8.84893e-102	1.73992e-99	SEMA3A
	461	ENSG00000163040	62.6423	1.41057	0.278729	5.06074	4.1764e-07	1.31186e-06	CCDC74A
	462	ENSG00000168056	1306.64	1.40861	0.2829	4.97918	6.38536e-07	1.96902e-06	LTBP3
	463	ENSG00000235453	50.9067	1.40798	0.326776	4.30871	1.64208e-05	4.34359e-05	SMIM27
	464	ENSG00000142102	502.536	1.40715	0.125508	11.2116	3.57556e-29	5.28384e-28	PGGHG
	465	ENSG00000107104	734.527	1.40674	0.0867591	16.2143	3.99665e-59	2.08017e-57	KANK1
	466	ENSG00000116396	182.718	1.40599	0.167198	8.40912	4.13103e-17	3.05553e-16	KCNC4
	467	ENSG00000154133	1693.73	1.40386	0.0850494	16.5064	3.29986e-61	1.85382e-59	ROBO4
	468	ENSG00000279673	27.9741	1.40188	0.4221	3.32121	0.000896287	0.00187759	NATD1
	469	ENSG00000287016	78.2604	1.40078	0.264696	5.29204	1.20963e-07	4.02271e-07	NA
	470	ENSG00000130758	804.24	1.39687	0.107714	12.9684	1.84958e-38	4.16287e-37	MAP3K10
	471	ENSG00000135124	245.344	1.39687	0.143562	9.73008	2.24415e-22	2.29887e-21	P2RX4
	472	ENSG00000231806	104.049	1.39623	0.217361	6.42355	1.33132e-10	5.83514e-10	PCAT7
	473	ENSG00000110881	96.9889	1.3947	0.270938	5.14768	2.63734e-07	8.45272e-07	ASIC1
	474	ENSG00000157470	196.835	1.38778	0.191132	7.26082	3.84751e-13	2.09095e-12	FAM81A
	475	ENSG00000163293	735.062	1.38548	0.133003	10.4169	2.07574e-25	2.50522e-24	NIPAL1
	476	ENSG00000105559	276.589	1.38375	0.15585	8.87874	6.76229e-19	5.5854e-18	PLEKHA4
	477	ENSG00000076864	149.084	1.38354	0.18605	7.43638	1.03486e-13	5.86957e-13	RAP1GAP
	478	ENSG00000258559	31.9157	1.38325	0.403698	3.42645	0.000611532	0.00131074	NA
	479	ENSG00000173281	347.219	1.38255	0.12375	11.1721	5.58455e-29	8.2013e-28	PPP1R3B
	480	ENSG00000066629	138.584	1.3824	0.218766	6.31908	2.63132e-10	1.119e-09	EML1
	481	ENSG00000163001	762.413	1.38196	0.0968769	14.2651	3.60965e-46	1.18291e-44	CFAP36
	482	ENSG00000124920	481.49	1.37963	0.148976	9.26072	2.03051e-20	1.84505e-19	MYRF
	483	ENSG00000163053	51.5213	1.37924	0.289297	4.76755	1.8648e-06	5.47036e-06	SLC16A14
	484	ENSG00000165511	92.9429	1.37885	0.248318	5.55276	2.81202e-08	9.95741e-08	ZNF22-AS1
	485	ENSG00000157657	1473.65	1.37809	0.0874838	15.7526	6.59472e-56	3.08124e-54	ZNF618
	486	ENSG00000245648	33.4901	1.37704	0.397392	3.4652	0.000529838	0.00114465	KLRK1-AS1
	487	ENSG00000171105	1213.77	1.37506	0.0723143	19.0151	1.27855e-80	1.33091e-78	INSR
	488	ENSG00000136828	128.623	1.37463	0.225996	6.08254	1.18296e-09	4.74794e-09	RALGPS1
	489	ENSG00000135299	355.169	1.37313	0.12032	11.4123	3.62966e-30	5.6036e-29	ANKRD6
	490	ENSG00000282508	37.2402	1.36942	0.339421	4.03457	5.47022e-05	0.000135506	LINC01002
	491	ENSG00000196843	256.79	1.36778	0.148469	9.21254	3.18496e-20	2.86829e-19	ARID5A
	492	ENSG00000225361	132.425	1.36769	0.213671	6.40094	1.54425e-10	6.7226e-10	PPP1R26-AS1
	493	ENSG00000137070	127.551	1.3676	0.219094	6.24207	4.31806e-10	1.80008e-09	IL11RA
	494	ENSG00000162729	447.028	1.36723	0.115581	11.8292	2.75747e-32	4.79576e-31	IGSF8
	495	ENSG00000235269	72.1318	1.36544	0.367188	3.71864	0.000200298	0.00045988	LINC02331
	496	ENSG00000104643	898.085	1.36541	0.100037	13.6491	2.04433e-42	5.59799e-41	MTMR9
	497	ENSG00000119801	1267.83	1.36418	0.117278	11.632	2.83303e-31	4.61002e-30	YPEL5
	498	ENSG00000144485	278.688	1.36396	0.136032	10.0268	1.16279e-23	1.2761e-22	HES6
	499	ENSG00000104313	116.862	1.36313	0.220678	6.17702	6.53225e-10	2.6805e-09	EYA1
	500	ENSG00000240891	575.332	1.36311	0.135288	10.0756	7.08144e-24	7.85673e-23	PLCXD2
	501	ENSG00000162654	223.552	1.36291	0.251278	5.4239	5.83117e-08	2.01003e-07	GBP4
	502	ENSG00000055732	532.971	1.36183	0.106074	12.8385	9.97659e-38	2.17625e-36	MCOLN3
	503	ENSG00000122707	426.441	1.35939	0.132911	10.2278	1.48821e-24	1.71011e-23	RECK
	504	ENSG00000171224	318.844	1.35781	0.131661	10.3129	6.16146e-25	7.25086e-24	FAM241B
	505	ENSG00000242615	58.203	1.3576	0.28165	4.82017	1.43434e-06	4.26326e-06	NA
	506	ENSG00000117016	75.3176	1.35754	0.272488	4.98201	6.29271e-07	1.94129e-06	RIMS3
	507	ENSG00000234327	96.1919	1.35727	0.258905	5.24235	1.58548e-07	5.20296e-07	ZNF232-AS1
	508	ENSG00000283162	123.98	1.35714	0.248043	5.47139	4.46524e-08	1.55127e-07	NA
	509	ENSG00000212864	205.596	1.35567	0.192214	7.05289	1.75241e-12	9.02466e-12	RNF208
	510	ENSG00000226652	53.0958	1.35522	0.303609	4.46369	8.05602e-06	2.20983e-05	PSMD10P2
	511	ENSG00000070087	3550.63	1.35517	0.0625085	21.6798	3.18516e-104	6.63122e-102	PFN2
	512	ENSG00000136040	98.5438	1.35501	0.23458	5.7763	7.63624e-09	2.85467e-08	PLXNC1
	513	ENSG00000102760	66.5306	1.35405	0.253777	5.3356	9.52294e-08	3.20838e-07	RGCC
	514	ENSG00000154134	723.695	1.35347	0.112604	12.0198	2.79608e-33	5.10104e-32	ROBO3
	515	ENSG00000172244	319.756	1.35293	0.124092	10.9026	1.11985e-27	1.5288e-26	C5orf34
	516	ENSG00000229373	570.889	1.3528	0.17247	7.84364	4.37659e-15	2.7772e-14	LINC00452
	517	ENSG00000261455	177.006	1.35066	0.201117	6.71579	1.87045e-11	8.85617e-11	LINC01003
	518	ENSG00000163013	826.307	1.34768	0.0870346	15.4844	4.41919e-54	1.94293e-52	FBXO41
	519	ENSG00000246922	42.1648	1.34535	0.325717	4.13044	3.62075e-05	9.17303e-05	UBAP1L
	520	ENSG00000112812	22.1815	1.34526	0.453424	2.9669	0.00300821	0.00579813	PRSS16
	521	ENSG00000105136	289.952	1.34508	0.155338	8.65906	4.75685e-18	3.73918e-17	ZNF419
	522	ENSG00000178665	82.0213	1.34449	0.255598	5.26019	1.43908e-07	4.74896e-07	ZNF713
	523	ENSG00000073910	55.9633	1.33564	0.298252	4.47822	7.52671e-06	2.07347e-05	FRY
	524	ENSG00000204389	186.74	1.33448	0.186575	7.15253	8.51903e-13	4.48842e-12	HSPA1A
	525	ENSG00000171291	355.936	1.33427	0.130235	10.2451	1.24482e-24	1.43744e-23	ZNF439
	526	ENSG00000197937	1597.97	1.33026	0.068935	19.2972	5.66512e-83	6.26571e-81	ZNF347
	527	ENSG00000236017	85.2236	1.32988	0.27375	4.85801	1.1857e-06	3.55711e-06	ASMTL-AS1
	528	ENSG00000090339	1139.09	1.32886	0.127901	10.3897	2.76146e-25	3.30744e-24	ICAM1
	529	ENSG00000214530	516.565	1.32877	0.124614	10.6631	1.51493e-26	1.94265e-25	STARD10
	530	ENSG00000196155	1712.28	1.3276	0.0722961	18.3634	2.5791e-75	2.25384e-73	PLEKHG4
	531	ENSG00000233593	53.3066	1.32653	0.316613	4.18976	2.79248e-05	7.18392e-05	LINC02609
	532	ENSG00000172602	28.7856	1.3255	0.365681	3.62475	0.000289242	0.000648527	RND1
	533	ENSG00000120693	144.313	1.32451	0.178003	7.44091	9.99955e-14	5.67845e-13	SMAD9
	534	ENSG00000165300	549.731	1.32378	0.118787	11.1442	7.6452e-29	1.11581e-27	SLITRK5
	535	ENSG00000261971	106.615	1.32226	0.228149	5.79559	6.8083e-09	2.55325e-08	MMP25-AS1
	536	ENSG00000251322	710.019	1.32061	0.103136	12.8045	1.54677e-37	3.33806e-36	SHANK3
	537	ENSG00000106484	742.438	1.31867	0.101577	12.9819	1.54889e-38	3.51969e-37	MEST
	538	ENSG00000167895	228.008	1.3176	0.156817	8.40217	4.38311e-17	3.23186e-16	TMC8
	539	ENSG00000165434	796.619	1.31759	0.0828192	15.9092	5.47139e-57	2.64363e-55	PGM2L1
	540	ENSG00000169884	97.5194	1.31696	0.205984	6.39351	1.62118e-10	7.04885e-10	WNT10B
	541	ENSG00000215548	160.991	1.31614	0.197024	6.68008	2.3881e-11	1.12097e-10	FRG1JP
	542	ENSG00000230798	97.4206	1.31507	0.274936	4.78317	1.72548e-06	5.08273e-06	FOXD3-AS1
	543	ENSG00000023839	142.592	1.31356	0.201997	6.50285	7.88135e-11	3.512e-10	ABCC2
	544	ENSG00000091490	992.02	1.31054	0.131739	9.94799	2.57334e-23	2.7831e-22	SEL1L3
	545	ENSG00000117425	25.2347	1.31007	0.510917	2.56416	0.0103426	0.0181956	PTCH2
	546	ENSG00000147894	460.151	1.30952	0.126381	10.3617	3.70326e-25	4.39824e-24	C9orf72
	547	ENSG00000129675	109.052	1.30888	0.293703	4.4565	8.33102e-06	2.27776e-05	ARHGEF6
	548	ENSG00000136999	651.147	1.30807	0.110212	11.8687	1.72159e-32	3.03897e-31	CCN3
	549	ENSG00000102879	91.6238	1.30796	0.234471	5.57832	2.42851e-08	8.65568e-08	CORO1A
	550	ENSG00000132031	173.227	1.30531	0.194854	6.69888	2.10019e-11	9.89103e-11	MATN3
	551	ENSG00000164976	315.833	1.30328	0.174618	7.46365	8.4159e-14	4.81001e-13	MYORG
	552	ENSG00000163909	124.8	1.30265	0.204739	6.36251	1.98483e-10	8.54079e-10	HEYL
	553	ENSG00000265962	44.8422	1.30089	0.327851	3.96794	7.24959e-05	0.000176861	GACAT2
	554	ENSG00000221923	178.041	1.2999	0.175323	7.41433	1.22245e-13	6.90041e-13	ZNF880
	555	ENSG00000178301	39.9591	1.29914	0.319643	4.06436	4.8165e-05	0.000120175	AQP11
	556	ENSG00000249550	346.547	1.29885	0.133147	9.75503	1.75557e-22	1.80622e-21	LINC01234
	557	ENSG00000269583	34.7568	1.29728	0.384857	3.37081	0.000749476	0.00158624	NA
	558	ENSG00000133083	158.379	1.29691	0.197118	6.57935	4.72497e-11	2.15154e-10	DCLK1
	559	ENSG00000279133	55.6339	1.29642	0.291929	4.44086	8.95997e-06	2.44358e-05	NA
	560	ENSG00000163734	84.7627	1.29195	0.259723	4.97434	6.54697e-07	2.01578e-06	CXCL3
	561	ENSG00000119888	470.999	1.29064	0.120834	10.6811	1.24725e-26	1.61106e-25	EPCAM
	562	ENSG00000177076	61.9831	1.29048	0.360351	3.58118	0.000342041	0.000759097	ACER2
	563	ENSG00000185745	1996.38	1.29032	0.243089	5.30801	1.1083e-07	3.70225e-07	IFIT1
	564	ENSG00000197013	55.3027	1.28887	0.299571	4.3024	1.68958e-05	4.45751e-05	ZNF429
	565	ENSG00000088340	57.9154	1.2886	0.357146	3.60805	0.000308501	0.000688655	FER1L4
	566	ENSG00000179528	183.988	1.2886	0.161658	7.97113	1.57234e-15	1.03581e-14	LBX2
	567	ENSG00000112394	85.1311	1.28846	0.242858	5.3054	1.12424e-07	3.7511e-07	SLC16A10
	568	ENSG00000113790	297.605	1.28825	0.124523	10.3455	4.38768e-25	5.20238e-24	EHHADH
	569	ENSG00000277496	116.067	1.28704	0.191125	6.73399	1.65076e-11	7.87391e-11	SLCO4A1-AS2
	570	ENSG00000074660	99.9449	1.28698	0.209784	6.13479	8.52718e-10	3.46695e-09	SCARF1
	571	ENSG00000172889	472.065	1.28588	0.116778	11.0113	3.37155e-28	4.73992e-27	EGFL7
	572	ENSG00000160326	1428.23	1.28551	0.0846537	15.1855	4.41425e-52	1.80614e-50	SLC2A6
	573	ENSG00000182986	1132	1.28399	0.0843407	15.2239	2.45626e-52	1.0138e-50	ZNF320
	574	ENSG00000105894	266.198	1.28136	0.154997	8.26697	1.37404e-16	9.78979e-16	PTN
	575	ENSG00000173156	204.881	1.2808	0.151493	8.45449	2.80317e-17	2.10082e-16	RHOD
	576	ENSG00000170899	181.053	1.28033	0.168406	7.60264	2.90148e-14	1.72372e-13	GSTA4
	577	ENSG00000136895	113.774	1.28	0.212035	6.0367	1.57296e-09	6.2499e-09	GARNL3
	578	ENSG00000011201	1195.83	1.27993	0.0743559	17.2135	2.10291e-66	1.37828e-64	ANOS1
	579	ENSG00000235927	37.7816	1.27906	0.373671	3.42295	0.000619465	0.00132654	NEXN-AS1
	580	ENSG00000105514	167.124	1.27893	0.226324	5.65086	1.5965e-08	5.78641e-08	RAB3D
	581	ENSG00000224631	67.2972	1.2773	0.303551	4.20785	2.57809e-05	6.66144e-05	RPS27AP16
	582	ENSG00000174871	57.8712	1.2721	0.27095	4.69495	2.66666e-06	7.70762e-06	CNIH2
	583	ENSG00000079263	349.268	1.272	0.147031	8.65123	5.09491e-18	3.99163e-17	SP140
	584	ENSG00000154310	353.071	1.27195	0.144859	8.7806	1.62603e-18	1.31017e-17	TNIK
	585	ENSG00000272913	211.734	1.27192	0.204641	6.21534	5.12123e-10	2.12302e-09	NA
	586	ENSG00000163644	833.492	1.27154	0.107099	11.8726	1.64307e-32	2.90398e-31	PPM1K
	587	ENSG00000160712	166.549	1.27148	0.217129	5.85584	4.74603e-09	1.80472e-08	IL6R
	588	ENSG00000137142	2425.79	1.27072	0.0762889	16.6567	2.70738e-62	1.57084e-60	IGFBPL1
	589	ENSG00000196422	2065.75	1.26802	0.0598739	21.1782	1.51676e-99	2.78868e-97	PPP1R26
	590	ENSG00000183647	485.025	1.26764	0.106971	11.8503	2.14377e-32	3.76076e-31	ZNF530
	591	ENSG00000153982	78.8195	1.26751	0.265228	4.77896	1.76208e-06	5.18408e-06	GDPD1
	592	ENSG00000179869	23.8965	1.26707	0.453071	2.79662	0.00516401	0.00956521	ABCA13
	593	ENSG00000128872	298.811	1.26621	0.151989	8.33098	8.01768e-17	5.80001e-16	TMOD2
	594	ENSG00000170965	49.6923	1.26559	0.288414	4.38809	1.1435e-05	3.08177e-05	PLAC1
	595	ENSG00000148677	34267	1.26374	0.263668	4.79293	1.64365e-06	4.85279e-06	ANKRD1
	596	ENSG00000204934	582.653	1.2637	0.115301	10.96	5.94731e-28	8.23031e-27	ATP6V0E2-AS1
	597	ENSG00000254470	1555.41	1.26306	0.0730583	17.2884	5.75471e-67	3.8429e-65	AP5B1
	598	ENSG00000275131	503.344	1.26108	0.123137	10.2413	1.29443e-24	1.49349e-23	PDE4DIPP2
	599	ENSG00000109680	108.157	1.26087	0.198875	6.34001	2.29748e-10	9.81455e-10	TBC1D19
	600	ENSG00000249471	441.867	1.2604	0.11614	10.8524	1.94237e-27	2.6139e-26	ZNF324B
	601	ENSG00000180626	363.26	1.25958	0.144599	8.71084	3.01643e-18	2.39908e-17	ZNF594
	602	ENSG00000226287	32.2913	1.25948	0.394908	3.18929	0.00142622	0.00290183	TMEM191A
	603	ENSG00000282057	544.103	1.25882	0.287156	4.38375	1.16654e-05	3.13909e-05	NA
	604	ENSG00000100473	381.654	1.25882	0.101946	12.3479	4.99949e-35	9.83025e-34	COCH
	605	ENSG00000253958	366.302	1.25846	0.12025	10.4654	1.24576e-25	1.52563e-24	CLDN23
	606	ENSG00000229619	65.3144	1.25653	0.266649	4.7123	2.44931e-06	7.09823e-06	MBNL1-AS1
	607	ENSG00000177125	516.657	1.25572	0.128919	9.7404	2.02758e-22	2.08155e-21	ZBTB34
	608	ENSG00000197417	160.401	1.25551	0.175265	7.16351	7.86384e-13	4.16492e-12	SHPK
	609	ENSG00000204876	234.19	1.25478	0.166765	7.52425	5.3024e-14	3.09148e-13	NA
	610	ENSG00000164970	1018.18	1.25429	0.0912252	13.7494	5.13837e-43	1.45779e-41	FAM219A
	611	ENSG00000183378	62.9075	1.25375	0.259515	4.83112	1.35769e-06	4.04223e-06	OVCH2
	612	ENSG00000136630	100.411	1.25314	0.261726	4.78799	1.68462e-06	4.96858e-06	HLX
	613	ENSG00000112561	79.5837	1.25164	0.258328	4.84517	1.26501e-06	3.78221e-06	TFEB
	614	ENSG00000130821	289.455	1.25157	0.1467	8.53147	1.44494e-17	1.10097e-16	SLC6A8
	615	ENSG00000198816	554.881	1.25056	0.129976	9.62144	6.49128e-22	6.45798e-21	ZNF358
	616	ENSG00000138642	1074.05	1.24949	0.0936515	13.3419	1.31967e-40	3.33023e-39	HERC6
	617	ENSG00000188185	122.211	1.24937	0.201774	6.19189	5.94472e-10	2.44507e-09	LINC00265
	618	ENSG00000174136	6653.97	1.24616	0.199811	6.2367	4.46909e-10	1.86085e-09	RGMB
	619	ENSG00000171365	528.791	1.24463	0.110888	11.2242	3.10219e-29	4.60837e-28	CLCN5
	620	ENSG00000254951	80.6139	1.24342	0.249779	4.97806	6.42236e-07	1.9787e-06	NA
	621	ENSG00000198156	24.5126	1.24238	0.445176	2.79076	0.00525838	0.00972855	NPIPB6
	622	ENSG00000105767	153.684	1.24187	0.165914	7.485	7.15498e-14	4.12599e-13	CADM4
	623	ENSG00000147874	2876.94	1.24043	0.0670574	18.498	2.14207e-76	1.95647e-74	HAUS6
	624	ENSG00000115355	7347.17	1.23999	0.0613269	20.2194	6.61131e-91	9.6491e-89	CCDC88A
	625	ENSG00000222000	31.9018	1.23935	0.392717	3.15584	0.00160037	0.00322925	NA
	626	ENSG00000251602	196.816	1.23935	0.155344	7.97807	1.48634e-15	9.81443e-15	MTA1-DT
	627	ENSG00000166341	56.1859	1.23844	0.296721	4.17375	2.99632e-05	7.67762e-05	DCHS1
	628	ENSG00000248890	47.2694	1.23814	0.343074	3.60896	0.000307433	0.000686595	HHIP-AS1
	629	ENSG00000281501	34.7256	1.23803	0.364172	3.39958	0.000674889	0.00143697	SEPSECS-AS1
	630	ENSG00000116017	336.782	1.23647	0.120112	10.2943	7.47376e-25	8.75153e-24	ARID3A
	631	ENSG00000181220	1180.76	1.2328	0.0937084	13.1557	1.57719e-39	3.77806e-38	ZNF746
	632	ENSG00000142046	32.8231	1.23269	0.376519	3.27391	0.00106069	0.00219631	TMEM91
	633	ENSG00000128052	157.217	1.23224	0.187226	6.58159	4.65448e-11	2.12149e-10	KDR
	634	ENSG00000272768	37.6183	1.22738	0.35792	3.42921	0.000605338	0.00129845	NA
	635	ENSG00000186300	200.499	1.22688	0.156381	7.84549	4.31277e-15	2.74039e-14	ZNF555
	636	ENSG00000167766	873.016	1.22661	0.111032	11.0473	2.25959e-28	3.20853e-27	ZNF83
	637	ENSG00000267383	131.168	1.22547	0.213463	5.74087	9.41887e-09	3.4989e-08	NA
	638	ENSG00000126803	150.23	1.22546	0.178765	6.85519	7.12187e-12	3.49357e-11	HSPA2
	639	ENSG00000118503	416.699	1.22284	0.136822	8.9375	3.98061e-19	3.33255e-18	TNFAIP3
	640	ENSG00000174137	159.717	1.21888	0.194339	6.27195	3.56562e-10	1.49788e-09	FAM53A
	641	ENSG00000100228	349.795	1.21776	0.116119	10.4871	9.90266e-26	1.21694e-24	RAB36
	642	ENSG00000149418	61.2542	1.21672	0.27628	4.40394	1.063e-05	2.87577e-05	ST14
	643	ENSG00000154240	219.653	1.21549	0.168449	7.21578	5.36266e-13	2.87682e-12	CEP112
	644	ENSG00000215302	95.4437	1.21513	0.207658	5.85159	4.869e-09	1.8485e-08	WHAMMP4
	645	ENSG00000258875	33.7039	1.21469	0.400258	3.03477	0.00240719	0.00471218	NA
	646	ENSG00000105479	44.7937	1.21372	0.356272	3.40672	0.000657495	0.00140268	ODAD1
	647	ENSG00000100979	50.6533	1.21356	0.318067	3.8154	0.000135961	0.000319894	PLTP
	648	ENSG00000196646	222.979	1.21313	0.153899	7.88266	3.2049e-15	2.05675e-14	ZNF136
	649	ENSG00000148483	53.7177	1.21304	0.363665	3.3356	0.00085115	0.00178753	TMEM236
	650	ENSG00000026103	131.239	1.21231	0.19778	6.12961	8.80927e-10	3.57856e-09	FAS
	651	ENSG00000139970	175.942	1.2107	0.166684	7.26346	3.7731e-13	2.05208e-12	RTN1
	652	ENSG00000139182	1099.62	1.2099	0.139404	8.67909	3.98954e-18	3.14652e-17	CLSTN3
	653	ENSG00000080493	230.334	1.20871	0.160534	7.52934	5.09976e-14	2.97967e-13	SLC4A4
	654	ENSG00000066230	165.228	1.20858	0.159756	7.56515	3.87414e-14	2.28222e-13	SLC9A3
	655	ENSG00000154930	165.077	1.20856	0.236225	5.11613	3.11862e-07	9.90138e-07	ACSS1
	656	ENSG00000250565	164.157	1.20821	0.17929	6.73883	1.5967e-11	7.62377e-11	ATP6V1E2
	657	ENSG00000174370	180.561	1.2069	0.157328	7.67121	1.70377e-14	1.03078e-13	KCNJ5-AS1
	658	ENSG00000107281	880.805	1.20539	0.103062	11.6958	1.3398e-31	2.22886e-30	NPDC1
	659	ENSG00000136870	496.706	1.20368	0.122766	9.80471	1.07454e-22	1.11937e-21	ZNF189
	660	ENSG00000105649	58.1358	1.20081	0.275846	4.35318	1.34177e-05	3.58472e-05	RAB3A
	661	ENSG00000198467	818.803	1.2006	0.118981	10.0907	6.07345e-24	6.74897e-23	TPM2
	662	ENSG00000132879	177.803	1.19992	0.194455	6.1707	6.79886e-10	2.78505e-09	FBXO44
	663	ENSG00000180921	295.546	1.19912	0.139526	8.59421	8.38421e-18	6.48254e-17	FAM83H
	664	ENSG00000132801	153.753	1.1991	0.172359	6.95699	3.47618e-12	1.75258e-11	ZSWIM3
	665	ENSG00000104723	2135.34	1.19867	0.0659654	18.1713	8.71833e-74	7.39074e-72	TUSC3
	666	ENSG00000100276	35.3124	1.19704	0.353664	3.38469	0.000712578	0.00151312	RASL10A
	667	ENSG00000134996	1788.16	1.19395	0.0730877	16.3358	5.48907e-60	2.94351e-58	OSTF1
	668	ENSG00000074966	69.3901	1.19335	0.293811	4.06161	4.87351e-05	0.000121469	TXK
	669	ENSG00000180596	46.6768	1.19244	0.31722	3.75902	0.000170582	0.000395437	H2BC4
	670	ENSG00000143947	15716	1.19228	0.0498029	23.9399	1.17768e-126	3.70497e-124	RPS27A
	671	ENSG00000138617	176.062	1.19125	0.162218	7.34353	2.0804e-13	1.15453e-12	PARP16
	672	ENSG00000204314	33.4043	1.19082	0.40111	2.96881	0.00298952	0.00576602	PRRT1
	673	ENSG00000204314	33.4043	1.19082	0.40111	2.96881	0.00298952	0.00576602	PRRT1
	674	ENSG00000198521	661.349	1.18954	0.102113	11.6492	2.31697e-31	3.80085e-30	ZNF43
	675	ENSG00000170954	228.604	1.18951	0.199607	5.95926	2.5339e-09	9.85777e-09	ZNF415
	676	ENSG00000178234	1544.49	1.18452	0.0702277	16.8669	7.88558e-64	4.83273e-62	GALNT11
	677	ENSG00000234284	39.6451	1.18183	0.411959	2.86882	0.00412012	0.00775852	ZNF879
	678	ENSG00000226332	217.54	1.18172	0.199054	5.93665	2.90897e-09	1.12612e-08	NA
	679	ENSG00000157741	675.622	1.18156	0.0941898	12.5444	4.26582e-36	8.85502e-35	UBN2
	680	ENSG00000148158	1327.65	1.1815	0.100862	11.714	1.08005e-31	1.80737e-30	SNX30
	681	ENSG00000187866	642.249	1.18098	0.101538	11.631	2.86711e-31	4.66013e-30	PABIR1
	682	ENSG00000134897	676.702	1.18096	0.0954829	12.3683	3.87847e-35	7.67938e-34	BIVM
	683	ENSG00000225138	275.979	1.18027	0.161048	7.32867	2.32443e-13	1.28543e-12	SLC9A3-AS1
	684	ENSG00000160161	131.837	1.17823	0.212938	5.5332	3.14433e-08	1.10842e-07	CILP2
	685	ENSG00000272398	518.073	1.17786	0.153635	7.66657	1.76651e-14	1.06691e-13	CD24
	686	ENSG00000267405	55.6532	1.17725	0.283831	4.14772	3.358e-05	8.53639e-05	NA
	687	ENSG00000163362	306.404	1.17668	0.180802	6.5081	7.61076e-11	3.39677e-10	INAVA
	688	ENSG00000185133	41.3585	1.17561	0.388462	3.02632	0.00247553	0.00483394	INPP5J
	689	ENSG00000107984	13482.4	1.17481	0.16623	7.06738	1.57885e-12	8.166e-12	1
	690	ENSG00000164050	228.452	1.17463	0.188142	6.24331	4.2841e-10	1.78645e-09	PLXNB1
	691	ENSG00000204604	818.449	1.17129	0.0966662	12.1168	8.60522e-34	1.59456e-32	ZNF468
	692	ENSG00000115525	368.262	1.16868	0.204577	5.71267	1.11216e-08	4.10236e-08	ST3GAL5
	693	ENSG00000187624	48.0971	1.16849	0.306316	3.81465	0.000136376	0.000320698	C17orf97
	694	ENSG00000154529	47.9074	1.16702	0.302181	3.86198	0.000112472	0.000268193	CNTNAP3B
	695	ENSG00000244349	40.2824	1.16522	0.318429	3.65929	0.00025292	0.000572711	NA
	696	ENSG00000279289	77.2813	1.16489	0.260196	4.47695	7.57174e-06	2.08466e-05	NA
	697	ENSG00000204923	154.485	1.1646	0.161249	7.22239	5.10811e-13	2.74755e-12	FBXO48
	698	ENSG00000174804	772.455	1.16447	0.111107	10.4807	1.06011e-25	1.30165e-24	FZD4
	699	ENSG00000256060	214.174	1.16346	0.172409	6.74825	1.49639e-11	7.16174e-11	TRAPPC2B
	700	ENSG00000132563	244.203	1.16337	0.164804	7.05913	1.67543e-12	8.64713e-12	REEP2
	701	ENSG00000068078	90.8851	1.16333	0.213732	5.44293	5.2411e-08	1.81237e-07	FGFR3
	702	ENSG00000276805	72.76	1.16321	0.280652	4.14466	3.40318e-05	8.64038e-05	NA
	703	ENSG00000005249	382.092	1.16143	0.122413	9.48776	2.36042e-21	2.27168e-20	PRKAR2B
	704	ENSG00000224167	147.788	1.16127	0.200049	5.80494	6.43895e-09	2.42115e-08	LINC01357
	705	ENSG00000141295	989.319	1.16088	0.107954	10.7534	5.70881e-27	7.546e-26	SCRN2
	706	ENSG00000170745	489.783	1.16075	0.113502	10.2267	1.50562e-24	1.72732e-23	KCNS3
	707	ENSG00000197070	1335.19	1.15963	0.0755553	15.3481	3.64785e-53	1.54619e-51	ARRDC1
	708	ENSG00000164885	781.948	1.15945	0.108947	10.6423	1.89395e-26	2.41773e-25	CDK5
	709	ENSG00000119431	407.373	1.15914	0.123811	9.36219	7.80979e-21	7.30754e-20	HDHD3
	710	ENSG00000124243	409.143	1.15628	0.110768	10.4387	1.65018e-25	2.01046e-24	BCAS4
	711	ENSG00000269001	239.648	1.15458	0.176838	6.52903	6.61967e-11	2.96847e-10	ZNF818P
	712	ENSG00000179899	47.1443	1.15163	0.30814	3.73736	0.00018596	0.000428418	PHC1P1
	713	ENSG00000285756	303.523	1.15125	0.155494	7.40378	1.32357e-13	7.45931e-13	NA
	714	ENSG00000188171	266.365	1.15089	0.142534	8.0745	6.77523e-16	4.59592e-15	ZNF626
	715	ENSG00000204262	42.4854	1.14903	0.397168	2.89305	0.00381515	0.0072333	COL5A2
	716	ENSG00000131015	516.506	1.14849	0.105571	10.8788	1.45493e-27	1.97483e-26	ULBP2
	717	ENSG00000177374	227.737	1.14692	0.179481	6.39021	1.65655e-10	7.18937e-10	HIC1
	718	ENSG00000107551	254.453	1.14677	0.189991	6.03593	1.58051e-09	6.27815e-09	RASSF4
	719	ENSG00000119938	178.958	1.1466	0.158396	7.23882	4.52617e-13	2.44943e-12	PPP1R3C
	720	ENSG00000161040	95.1781	1.1461	0.216327	5.29799	1.17085e-07	3.89743e-07	FBXL13
	721	ENSG00000172731	2758.97	1.14598	0.0980225	11.691	1.41764e-31	2.35558e-30	LRRC20
	722	ENSG00000105409	50.2983	1.14584	0.303947	3.76988	0.000163324	0.000379482	ATP1A3
	723	ENSG00000223773	41.7449	1.14572	0.314148	3.64709	0.00026523	0.000598765	CD99P1
	724	ENSG00000188732	298.286	1.14557	0.138463	8.27347	1.30119e-16	9.28477e-16	FAM221A
	725	ENSG00000285793	137.827	1.14548	0.17559	6.52357	6.86549e-11	3.07676e-10	ANAPC1P2
	726	ENSG00000184949	22.8654	1.14472	0.422044	2.71233	0.00668116	0.0121305	FAM227A
	727	ENSG00000143434	67.3042	1.14376	0.30223	3.7844	0.00015408	0.000359064	SEMA6C
	728	ENSG00000286156	157.714	1.1436	0.183248	6.24074	4.35496e-10	1.81386e-09	BMS1P23
	729	ENSG00000119862	262.443	1.14322	0.146199	7.81957	5.30041e-15	3.34841e-14	LGALSL
	730	ENSG00000261071	25.4797	1.14213	0.402951	2.8344	0.0045912	0.00857489	NA
	731	ENSG00000236438	171.901	1.142	0.167311	6.82561	8.75511e-12	4.26958e-11	FAM157A
	732	ENSG00000166532	1762.56	1.14193	0.0703659	16.2285	3.17163e-59	1.66299e-57	RIMKLB
	733	ENSG00000239521	99.9321	1.14145	0.27935	4.0861	4.38693e-05	0.00010998	CASTOR3P
	734	ENSG00000254827	180.153	1.14128	0.211483	5.39655	6.79345e-08	2.32982e-07	SLC22A18AS
	735	ENSG00000172059	759.233	1.141	0.098122	11.6284	2.95685e-31	4.79497e-30	KLF11
	736	ENSG00000160886	588.883	1.1409	0.141126	8.08427	6.25384e-16	4.25243e-15	LY6K
	737	ENSG00000160360	827.497	1.13996	0.0875986	13.0135	1.02577e-38	2.35745e-37	GPSM1
	738	ENSG00000204514	102.289	1.13896	0.250365	4.54919	5.3852e-06	1.50579e-05	ZNF814
	739	ENSG00000136231	2559.06	1.1383	0.0818784	13.9023	6.13169e-44	1.82366e-42	IGF2BP3
	740	ENSG00000127081	250.074	1.13773	0.174481	6.52064	7.00095e-11	3.1325e-10	ZNF484
	741	ENSG00000198948	365.43	1.13693	0.132267	8.59577	8.2709e-18	6.39842e-17	MFAP3L
	742	ENSG00000198948	365.43	1.13693	0.132267	8.59577	8.2709e-18	6.39842e-17	MFAP3L
	743	ENSG00000197128	426.019	1.1355	0.130443	8.70494	3.1773e-18	2.52136e-17	ZNF772
	744	ENSG00000110031	2589.76	1.13543	0.065216	17.4103	6.88903e-68	4.68884e-66	LPXN
	745	ENSG00000185860	39.3519	1.13493	0.32893	3.45036	0.000559831	0.00120595	CCDC190
	746	ENSG00000154589	64.472	1.13395	0.339639	3.33868	0.000841767	0.00176861	LY96
	747	ENSG00000277559	29.0486	1.13368	0.413984	2.73845	0.00617296	0.0112922	NA
	748	ENSG00000213762	979.547	1.13365	0.0950993	11.9207	9.23723e-33	1.64492e-31	ZNF134
	749	ENSG00000184792	186.899	1.13316	0.159935	7.08514	1.38903e-12	7.21632e-12	OSBP2
	750	ENSG00000140470	180.178	1.13257	0.157223	7.20354	5.86674e-13	3.14009e-12	ADAMTS17
	751	ENSG00000124635	50.1659	1.12835	0.289058	3.90355	9.47937e-05	0.000228192	H2BC11
	752	ENSG00000055609	4020.91	1.12797	0.0532122	21.1976	1.00521e-99	1.87247e-97	KMT2C
	753	ENSG00000070159	1722.33	1.12368	0.0806254	13.9371	3.7703e-44	1.13085e-42	PTPN3
	754	ENSG00000187566	46.4817	1.12343	0.29558	3.80077	0.000144249	0.000337432	NHLRC1
	755	ENSG00000166813	1447.3	1.12329	0.077925	14.415	4.1652e-47	1.42432e-45	KIF7
	756	ENSG00000259953	261.683	1.12285	0.149455	7.51296	5.78057e-14	3.36218e-13	LINC02977
	757	ENSG00000178078	834.207	1.12202	0.0793302	14.1437	2.04394e-45	6.50248e-44	STAP2
	758	ENSG00000213699	1526.91	1.11976	0.082088	13.641	2.28542e-42	6.24608e-41	SLC35F6
	759	ENSG00000230732	21.393	1.11877	0.500225	2.23652	0.0253176	0.0413261	NA
	760	ENSG00000130208	29.7059	1.11868	0.381691	2.93086	0.00338026	0.00646244	APOC1
	761	ENSG00000228109	67.8127	1.11768	0.293373	3.80976	0.000139101	0.000326576	MELTF-AS1
	762	ENSG00000146858	401.116	1.11734	0.172596	6.47372	9.56198e-11	4.23956e-10	ZC3HAV1L
	763	ENSG00000115267	430.55	1.11707	0.18074	6.18053	6.38852e-10	2.62228e-09	IFIH1
	764	ENSG00000186868	44.0434	1.1156	0.337298	3.30747	0.000941439	0.00196375	MAPT
	765	ENSG00000237943	70.3315	1.11556	0.266109	4.19211	2.76376e-05	7.11262e-05	PRKCQ-AS1
	766	ENSG00000167840	320.072	1.11509	0.122989	9.0666	1.22788e-19	1.06449e-18	ZNF232
	767	ENSG00000246082	300.604	1.11487	0.130462	8.54551	1.27973e-17	9.78247e-17	NUDT16L2P
	768	ENSG00000139737	662.418	1.11261	0.0843459	13.1911	9.87769e-40	2.3904e-38	SLAIN1
	769	ENSG00000101400	521.398	1.11244	0.10794	10.3061	6.61381e-25	7.76383e-24	SNTA1
	770	ENSG00000198440	194.676	1.11222	0.181105	6.14129	8.18538e-10	3.33086e-09	ZNF583
	771	ENSG00000138767	1138.49	1.11097	0.0775559	14.3247	1.5337e-46	5.08493e-45	CNOT6L
	772	ENSG00000164100	44.6026	1.11096	0.298209	3.72546	0.000194962	0.000448328	NDST3
	773	ENSG00000085760	2744.79	1.10878	0.0894775	12.3918	2.8961e-35	5.76655e-34	MTIF2
	774	ENSG00000184194	179.692	1.10817	0.164888	6.72072	1.80824e-11	8.57311e-11	GPR173
	775	ENSG00000198346	274.008	1.10811	0.130281	8.50555	1.80738e-17	1.36683e-16	ZNF813
	776	ENSG00000196739	1752.99	1.1075	0.0879796	12.5881	2.45492e-36	5.16408e-35	COL27A1
	777	ENSG00000164362	209.922	1.10636	0.181892	6.0825	1.18321e-09	4.74794e-09	TERT
	778	ENSG00000129646	258.841	1.10481	0.152993	7.22133	5.14828e-13	2.76811e-12	QRICH2
	779	ENSG00000247400	40.2644	1.10444	0.330945	3.33723	0.00084618	0.00177762	DNAJC3-DT
	780	ENSG00000269918	41.1594	1.10424	0.365331	3.02257	0.00250639	0.00489016	NA
	781	ENSG00000142065	120.389	1.1028	0.227908	4.8388	1.30623e-06	3.89886e-06	ZFP14
	782	ENSG00000272079	23.7238	1.10222	0.4143	2.66043	0.00780407	0.0140135	NA
	783	ENSG00000185436	161.717	1.10132	0.187676	5.86817	4.40639e-09	1.68053e-08	IFNLR1
	784	ENSG00000169026	219.45	1.10069	0.146149	7.53128	5.02466e-14	2.937e-13	SLC49A3
	785	ENSG00000170949	824.118	1.10046	0.112416	9.7892	1.25282e-22	1.30126e-21	ZNF160
	786	ENSG00000204054	312.93	1.10028	0.144834	7.59683	3.03484e-14	1.79993e-13	LINC00963
	787	ENSG00000166704	296.549	1.09872	0.144141	7.62252	2.48778e-14	1.48668e-13	ZNF606
	788	ENSG00000275457	60.3295	1.09845	0.288069	3.81315	0.000137206	0.000322501	NA
	789	ENSG00000224945	65.3497	1.09814	0.262073	4.19019	2.78722e-05	7.1717e-05	NA
	790	ENSG00000171462	378.065	1.09526	0.133681	8.19312	2.54543e-16	1.78218e-15	DLK2
	791	ENSG00000166123	2011.32	1.09328	0.079474	13.7564	4.66196e-43	1.33063e-41	GPT2
	792	ENSG00000197714	135.762	1.09287	0.204235	5.35105	8.74462e-08	2.96379e-07	ZNF460
	793	ENSG00000173825	47.5012	1.09252	0.285516	3.82646	0.000129999	0.00030704	TIGD3
	794	ENSG00000186280	53.8982	1.09166	0.287484	3.79728	0.000146292	0.000341928	KDM4D
	795	ENSG00000130717	1548.92	1.09036	0.0680008	16.0345	7.33461e-58	3.6562e-56	UCK1
	796	ENSG00000229563	37.0483	1.09032	0.362879	3.00465	0.00265885	0.00516342	LINC01204
	797	ENSG00000109654	591.497	1.08701	0.100513	10.8146	2.93569e-27	3.91342e-26	TRIM2
	798	ENSG00000197261	277.942	1.08521	0.1526	7.11143	1.14849e-12	6.0041e-12	C6orf141
	799	ENSG00000232098	797.4	1.08487	0.100277	10.8188	2.80408e-27	3.74151e-26	ZNF584-DT
	800	ENSG00000184226	103.035	1.08431	0.201859	5.37161	7.80364e-08	2.65759e-07	PCDH9
	801	ENSG00000212719	2967.43	1.08394	0.0626406	17.3042	4.37649e-67	2.9364e-65	LINC02693
	802	ENSG00000111752	478.187	1.08291	0.101621	10.6564	1.62837e-26	2.08623e-25	PHC1
	803	ENSG00000124216	52.4354	1.08074	0.302664	3.57076	0.000355948	0.000787613	SNAI1
	804	ENSG00000244187	891.545	1.08061	0.100401	10.7629	5.15424e-27	6.8195e-26	TMEM141
	805	ENSG00000169084	424.231	1.07959	0.10581	10.2031	1.92137e-24	2.18656e-23	DHRSX
	806	ENSG00000162620	86.448	1.07956	0.233031	4.63268	3.60963e-06	1.02861e-05	LRRIQ3
	807	ENSG00000144036	1298.97	1.07913	0.0822002	13.1281	2.27218e-39	5.37016e-38	EXOC6B
	808	ENSG00000197279	75.0357	1.07839	0.260972	4.13219	3.59319e-05	9.10649e-05	ZNF165
	809	ENSG00000183889	25.971	1.07741	0.48216	2.23455	0.025447	0.0415151	NPIPA9
	810	ENSG00000183889	25.971	1.07741	0.48216	2.23455	0.025447	0.0415151	NPIPA9
	811	ENSG00000247081	54.0953	1.07739	0.31531	3.41692	0.000633344	0.00135483	BAALC-AS1
	812	ENSG00000102098	577.217	1.07706	0.126031	8.54602	1.27411e-17	9.74477e-17	SCML2
	813	ENSG00000232040	108.245	1.07677	0.222758	4.83382	1.33939e-06	3.98941e-06	ZBED9
	814	ENSG00000173890	259.65	1.07659	0.132987	8.0954	5.70769e-16	3.89228e-15	GPR160
	815	ENSG00000186272	225.635	1.07579	0.173974	6.18364	6.26401e-10	2.57191e-09	ZNF17
	816	ENSG00000131737	46.3905	1.07537	0.326672	3.2919	0.000995124	0.00206872	KRT34
	817	ENSG00000137145	1279.55	1.07522	0.0771296	13.9404	3.59794e-44	1.08145e-42	DENND4C
	818	ENSG00000176593	130.29	1.07452	0.20812	5.16297	2.43068e-07	7.81892e-07	NA
	819	ENSG00000269825	1438.72	1.07438	0.0825729	13.0113	1.0552e-38	2.41722e-37	NA
	820	ENSG00000002746	109.238	1.07414	0.209078	5.1375	2.78413e-07	8.90129e-07	HECW1
	821	ENSG00000124615	1638.43	1.07369	0.0644536	16.6583	2.63472e-62	1.53497e-60	MOCS1
	822	ENSG00000165655	378.139	1.07276	0.125115	8.57415	9.98242e-18	7.66799e-17	ZNF503
	823	ENSG00000225177	36.7956	1.07228	0.383932	2.7929	0.00522386	0.00966848	NHSL1-AS1
	824	ENSG00000163393	478.656	1.07203	0.131142	8.17453	2.97024e-16	2.07039e-15	SLC22A15
	825	ENSG00000196569	36.2128	1.07133	0.347921	3.07924	0.00207528	0.00411193	LAMA2
	826	ENSG00000146555	454.012	1.07128	0.132295	8.09768	5.60194e-16	3.82385e-15	SDK1
	827	ENSG00000079931	220.861	1.07013	0.168037	6.36839	1.9102e-10	8.23972e-10	MOXD1
	828	ENSG00000127080	921.74	1.06971	0.0926175	11.5497	7.40702e-31	1.17954e-29	IPPK
	829	ENSG00000287263	117.86	1.06934	0.217744	4.91097	9.06252e-07	2.75141e-06	NA
	830	ENSG00000109705	143.322	1.06916	0.177637	6.0188	1.75713e-09	6.94656e-09	NKX3-2
	831	ENSG00000132274	64.691	1.06861	0.293127	3.64555	0.000266818	0.000601752	TRIM22
	832	ENSG00000145246	1392.62	1.06771	0.084587	12.6226	1.58536e-36	3.35484e-35	ATP10D
	833	ENSG00000119729	1008.01	1.06661	0.0916859	11.6333	2.79016e-31	4.54549e-30	RHOQ
	834	ENSG00000152443	882.093	1.066	0.0943722	11.2957	1.37821e-29	2.0801e-28	ZNF776
	835	ENSG00000136848	3442.87	1.06503	0.0554604	19.2034	3.46886e-82	3.72035e-80	DAB2IP
	836	ENSG00000175536	49.6249	1.06456	0.354494	3.00303	0.00267304	0.00519027	LIPT2
	837	ENSG00000103404	838.687	1.06368	0.0947974	11.2205	3.23348e-29	4.79836e-28	USP31
	838	ENSG00000127863	257.287	1.06306	0.147277	7.21813	5.27076e-13	2.82966e-12	TNFRSF19
	839	ENSG00000165171	50.1006	1.06281	0.374629	2.83697	0.00455442	0.00851518	METTL27
	840	ENSG00000119509	710.164	1.06142	0.0939537	11.2973	1.35302e-29	2.04426e-28	INVS
	841	ENSG00000249898	32.9925	1.06084	0.351005	3.0223	0.00250864	0.0048932	MCPH1-AS1
	842	ENSG00000186019	42.0173	1.06026	0.399887	2.65141	0.00801561	0.0143696	ZNF225-AS1
	843	ENSG00000287104	25.6533	1.05978	0.428874	2.47108	0.0134707	0.0232339	NA
	844	ENSG00000197852	193.765	1.05964	0.162455	6.52269	6.90585e-11	3.09289e-10	INKA2
	845	ENSG00000275185	43.1592	1.05951	0.344569	3.07489	0.00210581	0.00416601	NA
	846	ENSG00000166165	2988.85	1.05937	0.0594369	17.8234	4.65263e-71	3.5993e-69	CKB
	847	ENSG00000197646	165.901	1.05859	0.168561	6.28015	3.38253e-10	1.42392e-09	PDCD1LG2
	848	ENSG00000104626	2194.11	1.05801	0.08495	12.4545	1.32197e-35	2.67359e-34	ERI1
	849	ENSG00000226278	151.331	1.05745	0.186539	5.66878	1.43817e-08	5.23263e-08	PSPHP1
	850	ENSG00000158125	60.05	1.05636	0.375966	2.80972	0.00495846	0.00920977	XDH
	851	ENSG00000070610	2316.22	1.05522	0.0544656	19.3741	1.27682e-83	1.44607e-81	GBA2
	852	ENSG00000204524	318.717	1.0549	0.14044	7.51137	5.85126e-14	3.4019e-13	ZNF805
	853	ENSG00000079459	3891.32	1.0548	0.0783313	13.4658	2.48545e-41	6.47549e-40	FDFT1
	854	ENSG00000270055	212.381	1.0537	0.160211	6.57697	4.80133e-11	2.1828e-10	NA
	855	ENSG00000258603	34.581	1.05364	0.346711	3.03896	0.00237398	0.00465426	NA
	856	ENSG00000125648	1738.4	1.05326	0.0764754	13.7725	3.72926e-43	1.07307e-41	SLC25A23
	857	ENSG00000146232	1094.21	1.05316	0.0777212	13.5505	7.86697e-42	2.09347e-40	NFKBIE
	858	ENSG00000100342	729.912	1.05298	0.135841	7.75157	9.07636e-15	5.60131e-14	APOL1
	859	ENSG00000183778	470.791	1.05245	0.107514	9.78901	1.25517e-22	1.30274e-21	B3GALT5
	860	ENSG00000172738	42.0567	1.05137	0.34283	3.06673	0.00216412	0.00427599	TMEM217
	861	ENSG00000244300	289.212	1.05103	0.12922	8.13367	4.16474e-16	2.87051e-15	GATA2-AS1
	862	ENSG00000131094	44.1693	1.05068	0.315807	3.32696	0.000877998	0.00184146	C1QL1
	863	ENSG00000103260	1103.62	1.05025	0.125167	8.39078	4.82931e-17	3.54424e-16	METRN
	864	ENSG00000116663	48.5478	1.04979	0.298664	3.51497	0.000439808	0.00096071	FBXO6
	865	ENSG00000176714	43.9617	1.04876	0.338226	3.10077	0.00193015	0.00384374	CCDC121
	866	ENSG00000236671	94.2115	1.04838	0.241946	4.33311	1.4702e-05	3.91014e-05	PRKG1-AS1
	867	ENSG00000143772	524.556	1.04831	0.117139	8.94928	3.57817e-19	3.00452e-18	ITPKB
	868	ENSG00000040608	61.1554	1.04824	0.328803	3.18805	0.00143234	0.00291262	RTN4R
	869	ENSG00000103056	70.8604	1.0478	0.276846	3.78478	0.000153846	0.000358578	SMPD3
	870	ENSG00000278129	345.243	1.04762	0.121392	8.63008	6.13103e-18	4.77957e-17	ZNF8
	871	ENSG00000119922	3649.26	1.04739	0.18832	5.56174	2.671e-08	9.47702e-08	IFIT2
	872	ENSG00000115310	23420.6	1.04665	0.0577162	18.1344	1.70445e-73	1.4029e-71	RTN4
	873	ENSG00000132819	1652.3	1.0465	0.0785171	13.3283	1.58502e-40	3.98563e-39	RBM38
	874	ENSG00000011523	377.609	1.04631	0.139047	7.52491	5.2756e-14	3.07732e-13	CEP68
	875	ENSG00000196584	1771.03	1.04545	0.0730446	14.3125	1.82895e-46	6.02151e-45	XRCC2
	876	ENSG00000261105	35.6236	1.04385	0.356018	2.93201	0.00336772	0.00644195	LMO7-AS1
	877	ENSG00000028277	1433.95	1.04289	0.0731433	14.2582	3.98319e-46	1.30231e-44	POU2F2
	878	ENSG00000136367	121.641	1.04261	0.222528	4.6853	2.79556e-06	8.06207e-06	ZFHX2
	879	ENSG00000174327	126.872	1.04254	0.194015	5.37351	7.72171e-08	2.63096e-07	SLC16A13
	880	ENSG00000160469	190.371	1.04237	0.165842	6.28532	3.27185e-10	1.37856e-09	BRSK1
	881	ENSG00000132003	345.401	1.04163	0.1423	7.31997	2.48019e-13	1.37049e-12	ZSWIM4
	882	ENSG00000184584	1041.94	1.04018	0.0973537	10.6846	1.20202e-26	1.55691e-25	STING1
	883	ENSG00000113504	954.367	1.04017	0.0910396	11.4254	3.12159e-30	4.84006e-29	SLC12A7
	884	ENSG00000112715	6747.58	1.03944	0.248693	4.17959	2.92036e-05	7.49248e-05	VEGFA
	885	ENSG00000265401	38.5845	1.03911	0.373039	2.78554	0.00534393	0.00987134	NA
	886	ENSG00000124762	2200.37	1.03738	0.0808472	12.8314	1.09384e-37	2.37508e-36	CDKN1A
	887	ENSG00000188352	156.986	1.03719	0.176552	5.87471	4.23587e-09	1.61768e-08	FOCAD
	888	ENSG00000095209	1747.97	1.03719	0.0723497	14.3358	1.30713e-46	4.3439e-45	TMEM38B
	889	ENSG00000180257	191.136	1.03695	0.182497	5.68199	1.33133e-08	4.87398e-08	ZNF816
	890	ENSG00000181264	601.749	1.03691	0.114819	9.03083	1.70374e-19	1.46092e-18	TLCD5
	891	ENSG00000267060	50.6108	1.03687	0.327284	3.1681	0.00153441	0.00310191	PTGES3L
	892	ENSG00000171757	83.4929	1.03634	0.21542	4.81077	1.50349e-06	4.45245e-06	LRRC34
	893	ENSG00000087510	1796.93	1.03625	0.0803291	12.9001	4.49545e-38	9.92857e-37	TFAP2C
	894	ENSG00000205755	45.6456	1.03396	0.384574	2.68858	0.00717576	0.0129543	CRLF2
	895	ENSG00000155016	801.045	1.03319	0.10856	9.51721	1.77883e-21	1.72841e-20	CYP2U1
	896	ENSG00000234129	24.7582	1.03286	0.411741	2.50852	0.0121236	0.0210724	HCCS-DT
	897	ENSG00000174365	233.968	1.03253	0.138501	7.45504	8.98408e-14	5.11615e-13	SNHG11
	898	ENSG00000155265	120.859	1.03239	0.2711	3.80814	0.000140015	0.000328177	GOLGA7B
	899	ENSG00000256751	165.48	1.03228	0.169599	6.08657	1.15354e-09	4.63544e-09	PLBD1-AS1
	900	ENSG00000277778	494.794	1.03127	0.15297	6.74165	1.56597e-11	7.48209e-11	PGM5P2
	901	ENSG00000173542	2768.12	1.02926	0.068481	15.0299	4.67718e-51	1.80915e-49	MOB1B
	902	ENSG00000171843	803.372	1.02866	0.093252	11.0309	2.71022e-28	3.83303e-27	MLLT3
	903	ENSG00000186787	205.055	1.02815	0.144941	7.09353	1.30732e-12	6.80179e-12	SPIN2B
	904	ENSG00000164898	198.146	1.02743	0.156514	6.56447	5.22187e-11	2.36035e-10	FMC1
	905	ENSG00000084676	1130.25	1.02693	0.0815863	12.587	2.48813e-36	5.22617e-35	NCOA1
	906	ENSG00000124613	153.306	1.02595	0.172497	5.94764	2.72044e-09	1.05545e-08	ZNF391
	907	ENSG00000173531	20.2316	1.02546	0.48351	2.12086	0.0339332	0.0537291	MST1
	908	ENSG00000048052	1081.95	1.02514	0.135485	7.56644	3.83598e-14	2.26181e-13	HDAC9
	909	ENSG00000059804	1587.92	1.02392	0.122113	8.38503	5.07144e-17	3.71425e-16	SLC2A3
	910	ENSG00000153093	170.261	1.02339	0.151314	6.76335	1.34838e-11	6.47523e-11	ACOXL
	911	ENSG00000152433	142.523	1.02338	0.21162	4.83593	1.32526e-06	3.94983e-06	ZNF547
	912	ENSG00000180739	130.838	1.02287	0.177558	5.76075	8.37386e-09	3.12299e-08	S1PR5
	913	ENSG00000156042	43.4144	1.02276	0.328272	3.11558	0.00183584	0.00366882	CFAP70
	914	ENSG00000165801	1300.79	1.02262	0.141443	7.22993	4.83249e-13	2.6112e-12	ARHGEF40
	915	ENSG00000119917	4700.15	1.02226	0.108092	9.45726	3.16109e-21	3.0258e-20	IFIT3
	916	ENSG00000126709	310.089	1.02202	0.118624	8.61558	6.95868e-18	5.40395e-17	IFI6
	917	ENSG00000244573	23.469	1.02129	0.440262	2.31974	0.0203547	0.0338735	RPL30P11
	918	ENSG00000157693	529.265	1.02127	0.111899	9.12673	7.05993e-20	6.21177e-19	TMEM268
	919	ENSG00000130477	64.9595	1.02074	0.281818	3.62197	0.000292368	0.000654913	UNC13A
	920	ENSG00000197724	2204.44	1.02063	0.0621657	16.418	1.42279e-60	7.80716e-59	PHF2
	921	ENSG00000177508	677.285	1.02049	0.11028	9.2536	2.17051e-20	1.96595e-19	IRX3
	922	ENSG00000130653	66.0396	1.02042	0.259064	3.93886	8.18687e-05	0.000198326	PNPLA7
	923	ENSG00000196867	551.561	1.01847	0.0971817	10.48	1.06729e-25	1.30932e-24	ZFP28
	924	ENSG00000130762	113.275	1.01808	0.256421	3.97036	7.17633e-05	0.000175194	ARHGEF16
	925	ENSG00000122729	7246.33	1.01765	0.049712	20.4708	3.91813e-93	6.09549e-91	ACO1
	926	ENSG00000213244	26.642	1.01718	0.387557	2.62459	0.00867541	0.0154782	H3P4
	927	ENSG00000198208	562.523	1.01712	0.111434	9.1276	7.00351e-20	6.17365e-19	RPS6KL1
	928	ENSG00000145284	964.137	1.01648	0.0860083	11.8184	3.13593e-32	5.42731e-31	SCD5
	929	ENSG00000223345	31.3053	1.01518	0.399348	2.5421	0.0110189	0.0193015	H2BP1
	930	ENSG00000213793	426.2	1.01504	0.137874	7.36207	1.81086e-13	1.00811e-12	ZNF888
	931	ENSG00000136874	1486.02	1.01501	0.0792101	12.8142	1.36597e-37	2.95689e-36	STX17
	932	ENSG00000272269	216.215	1.01432	0.15468	6.55755	5.47002e-11	2.46779e-10	NUP153-AS1
	933	ENSG00000173898	877.806	1.01331	0.098096	10.3298	5.16747e-25	6.1065e-24	SPTBN2
	934	ENSG00000164056	838.127	1.01304	0.230384	4.39718	1.09665e-05	2.95944e-05	SPRY1
	935	ENSG00000165115	853.129	1.01304	0.0859199	11.7905	4.36847e-32	7.48722e-31	KIF27
	936	ENSG00000105499	75.4856	1.01296	0.299564	3.38144	0.00072107	0.00152977	PLA2G4C
	937	ENSG00000010295	168.349	1.01285	0.192321	5.26648	1.39061e-07	4.59331e-07	IFFO1
	938	ENSG00000279227	37.7908	1.01217	0.357834	2.8286	0.00467514	0.00872361	NA
	939	ENSG00000168453	111.333	1.01153	0.266107	3.80121	0.000143993	0.000336887	HR
	940	ENSG00000110723	343.138	1.01073	0.121146	8.34312	7.2355e-17	5.26919e-16	EXPH5
	941	ENSG00000090971	964.141	1.00974	0.110626	9.1275	7.00971e-20	6.17504e-19	NAT14
	942	ENSG00000163359	722.923	1.00825	0.131119	7.68955	1.47658e-14	8.97552e-14	COL6A3
	943	ENSG00000214595	456.232	1.00727	0.111953	8.99721	2.31517e-19	1.96498e-18	EML6
	944	ENSG00000188559	1029.4	1.00722	0.0893439	11.2736	1.77233e-29	2.64952e-28	RALGAPA2
	945	ENSG00000213085	63.3457	1.00686	0.254165	3.96145	7.44957e-05	0.000181427	CFAP45
	946	ENSG00000197362	360.17	1.00683	0.149081	6.75356	1.4426e-11	6.9113e-11	ZNF786
	947	ENSG00000162390	35.0171	1.00659	0.417025	2.41373	0.01579	0.0268645	ACOT11
	948	ENSG00000204519	424.328	1.00597	0.137835	7.2984	2.9121e-13	1.59979e-12	ZNF551
	949	ENSG00000108771	239.048	1.00595	0.182287	5.51847	3.41957e-08	1.19947e-07	DHX58
	950	ENSG00000143355	60.5931	1.00548	0.276484	3.63667	0.000276186	0.000621615	LHX9
	951	ENSG00000071242	352.271	1.00477	0.167133	6.01177	1.83504e-09	7.23639e-09	RPS6KA2
	952	ENSG00000167925	1270.82	1.0037	0.068847	14.5787	3.83698e-48	1.35125e-46	GHDC
	953	ENSG00000197024	762.65	1.00261	0.103486	9.68837	3.37887e-22	3.4241e-21	ZNF398
	954	ENSG00000261253	62.9223	1.00167	0.283714	3.53058	0.000414656	0.000908713	NA
	955	ENSG00000287166	17.2678	1.00054	0.473608	2.11259	0.0346355	0.0547432	NA
	956	ENSG00000122778	1583.88	1.0005	0.107163	9.33619	9.98669e-21	9.25272e-20	KIAA1549
	957	ENSG00000188785	320.282	1.00028	0.115411	8.66708	4.43332e-18	3.48874e-17	ZNF548
	958	ENSG00000095321	865.72	1.00005	0.133688	7.48047	7.40575e-14	4.26019e-13	CRAT

## Sheet: CDGAP KI1
			UP REGULATED									DOWN REGULATED
			gene	baseMean	estimate	stderror	statistic	p.value	p.adjusted	symbol			gene	baseMean	estimate	stderror	statistic	p.value	p.adjusted	symbol
		1	ENSG00000206195	327.382	5.58252	0.239826	23.2774	7.50899e-120	3.66568e-117	DUXAP8		1	ENSG00000233830	114.828	-1.00013	0.18965	-5.27354	1.33817e-07	4.89519e-07	EIF4HP1
		2	ENSG00000227706	1832.73	5.36927	0.241109	22.2691	7.36659e-110	2.26715e-107	NA		2	ENSG00000164093	47.2211	-1.0015	0.298648	-3.35346	0.000798067	0.00180887	PITX2
		3	ENSG00000162591	1026.99	5.24017	0.282079	18.577	4.93595e-77	5.87212e-75	MEGF6		3	ENSG00000144589	563.482	-1.00163	0.0907153	-11.0415	2.40985e-28	3.88568e-27	STK11IP
		4	ENSG00000178538	273.061	5.12076	0.279498	18.3213	5.59865e-75	6.39195e-73	CA8		4	ENSG00000106125	41.7158	-1.0054	0.351939	-2.85676	0.00427995	0.00848974	MINDY4
		5	ENSG00000163395	955.875	4.83688	0.301212	16.0581	5.01914e-58	3.07602e-56	IGFN1		5	ENSG00000170379	57.7951	-1.00584	0.274324	-3.66662	0.000245773	0.00059866	TCAF2
		6	ENSG00000165105	364.516	4.61637	0.203796	22.6519	1.33571e-113	4.61212e-111	RASEF		6	ENSG00000137818	33126.3	-1.00745	0.0427158	-23.5851	5.48498e-123	2.98657e-120	RPLP1
		7	ENSG00000162458	737.32	4.34632	0.156914	27.6988	7.2087e-169	8.50446e-166	FBLIM1		7	ENSG00000137821	375.749	-1.00945	0.123768	-8.15597	3.46388e-16	2.62376e-15	LRRC49
		8	ENSG00000182272	628.173	4.23237	0.147798	28.6362	2.37863e-180	4.20928e-177	B4GALNT4		8	ENSG00000170049	73.4147	-1.00975	0.262635	-3.84467	0.000120713	0.000308751	KCNAB3
		9	ENSG00000114251	237.459	4.22734	0.243828	17.3374	2.45644e-67	2.05774e-65	WNT5A		9	ENSG00000279088	106.237	-1.01096	0.187809	-5.38289	7.33003e-08	2.746e-07	NA
		10	ENSG00000091129	225.165	4.10253	0.201145	20.3959	1.81865e-92	3.38771e-90	NRCAM		10	ENSG00000279356	20.8776	-1.0117	0.46336	-2.18341	0.0290059	0.048427	NA
		11	ENSG00000117983	781.502	4.08718	0.731828	5.58489	2.33845e-08	9.26026e-08	MUC5B		11	ENSG00000181026	3529.76	-1.01261	0.116945	-8.65885	4.76534e-18	4.09362e-17	AEN
		12	ENSG00000019186	278.649	4.0401	0.169431	23.8451	1.13794e-125	7.0043e-123	CYP24A1		12	ENSG00000147224	3550.59	-1.01387	0.0583642	-17.3715	1.35641e-67	1.15679e-65	PRPS1
		13	ENSG00000163993	156.292	3.82901	0.238384	16.0624	4.68065e-58	2.89362e-56	S100P		13	ENSG00000163694	303.993	-1.01389	0.194754	-5.20601	1.9294e-07	6.97333e-07	RBM47
		14	ENSG00000165757	128.351	3.82489	0.313814	12.1884	3.58435e-34	7.97855e-33	JCAD		14	ENSG00000271862	25.6804	-1.0143	0.397112	-2.55419	0.0106434	0.0194424	NA
		15	ENSG00000142494	268.295	3.7342	0.225256	16.5776	1.01175e-61	7.12607e-60	SLC47A1		15	ENSG00000131584	2446.48	-1.01523	0.0825722	-12.295	9.63233e-35	2.21732e-33	ACAP3
		16	ENSG00000064692	220.404	3.69629	0.266995	13.844	1.38201e-43	4.78365e-42	SNCAIP		16	ENSG00000232119	1779.75	-1.01559	0.0666651	-15.2341	2.09876e-52	9.93716e-51	MCTS1
		17	ENSG00000133026	1585.53	3.6641	0.12752	28.7334	1.45889e-181	2.95051e-178	MYH10		17	ENSG00000175591	845.047	-1.01645	0.0953483	-10.6604	1.56007e-26	2.25827e-25	P2RY2
		18	ENSG00000147676	321.85	3.65404	0.226355	16.143	1.27294e-58	8.15429e-57	MAL2		18	ENSG00000139174	1158.72	-1.01655	0.0775596	-13.1067	3.01606e-39	8.66093e-38	PRICKLE1
		19	ENSG00000232759	192.657	3.63282	0.252957	14.3614	9.03992e-47	3.55495e-45	STEAP1B-AS1		19	ENSG00000167220	389.804	-1.01677	0.120231	-8.45687	2.74659e-17	2.24371e-16	HDHD2
		20	ENSG00000161249	341.527	3.61046	0.173925	20.7587	1.02358e-95	1.98505e-93	DMKN		20	ENSG00000127399	501.951	-1.0168	0.106646	-9.53439	1.50764e-21	1.61328e-20	LRRC61
		21	ENSG00000176842	253.035	3.59381	0.239878	14.9818	9.6494e-51	4.32299e-49	IRX5		21	ENSG00000184371	4674.82	-1.01795	0.183976	-5.53305	3.14711e-08	1.22873e-07	CSF1
		22	ENSG00000178773	150.587	3.58422	0.304351	11.7766	5.15321e-32	1.02093e-30	CPNE7		22	ENSG00000162745	119.738	-1.01828	0.245657	-4.14513	3.39617e-05	9.34127e-05	OLFML2B
		23	ENSG00000154359	210.04	3.53388	0.210699	16.7722	3.90037e-63	2.87591e-61	LONRF1		23	ENSG00000140543	36.5568	-1.01889	0.325528	-3.12996	0.00174832	0.00373939	DET1
		24	ENSG00000136943	173.997	3.48924	0.249791	13.9686	2.42318e-44	8.68479e-43	CTSV		24	ENSG00000137434	155.924	-1.02303	0.17727	-5.77105	7.87785e-09	3.26101e-08	C6orf52
		25	ENSG00000152270	387.674	3.48855	0.175659	19.8598	9.06295e-88	1.49191e-85	PDE3B		25	ENSG00000166557	3525.07	-1.0247	0.0589315	-17.388	1.01787e-67	8.78656e-66	TMED3
		26	ENSG00000170689	590.484	3.43447	0.151306	22.6988	4.60798e-114	1.71672e-111	HOXB9		26	ENSG00000084444	460.797	-1.0251	0.119181	-8.60124	7.88619e-18	6.67732e-17	FAM234B
		27	ENSG00000158220	138.142	3.41829	0.253416	13.4888	1.81927e-41	5.76185e-40	ESYT3		27	ENSG00000172986	222.026	-1.02599	0.157982	-6.49434	8.3398e-11	4.13398e-10	GXYLT2
		28	ENSG00000170498	851.588	3.39942	0.293382	11.587	4.79581e-31	8.93346e-30	KISS1		28	ENSG00000136159	1928.81	-1.02637	0.0769555	-13.3372	1.40676e-40	4.27372e-39	NUDT15
		29	ENSG00000116852	107.283	3.38635	0.309003	10.959	6.01823e-28	9.50893e-27	KIF21B		29	ENSG00000188917	1220.85	-1.02659	0.0784954	-13.0784	4.37529e-39	1.2413e-37	TRMT2B
		30	ENSG00000042062	211.127	3.35342	0.293227	11.4363	2.75479e-30	4.92419e-29	RIPOR3		30	ENSG00000075223	5175.28	-1.02765	0.0532048	-19.3151	4.01214e-83	5.79591e-81	SEMA3C
		31	ENSG00000198542	244.575	3.32484	0.17778	18.7019	4.7758e-78	5.87922e-76	ITGBL1		31	ENSG00000263535	19.3159	-1.02788	0.423364	-2.42789	0.0151868	0.0268817	AK4P1
		32	ENSG00000149212	260.888	3.31859	0.215628	15.3903	1.90011e-53	9.37277e-52	SESN3		32	ENSG00000147606	57.0675	-1.02829	0.317116	-3.24264	0.00118429	0.00260828	SLC26A7
		33	ENSG00000151468	185.098	3.30212	0.23081	14.3067	1.98751e-46	7.70882e-45	CCDC3		33	ENSG00000271147	97.961	-1.02894	0.211292	-4.86975	1.11738e-06	3.67877e-06	ARMCX5-GPRASP2
		34	ENSG00000088538	347.364	3.22084	0.165408	19.4721	1.89403e-84	2.79311e-82	DOCK3		34	ENSG00000049239	1464.01	-1.02902	0.115445	-8.91354	4.94301e-19	4.51181e-18	H6PD
		35	ENSG00000068615	182.099	3.1835	0.247387	12.8685	6.77073e-38	1.81197e-36	REEP1		35	ENSG00000088280	809.15	-1.02921	0.279018	-3.6887	0.000225399	0.000552072	ASAP3
		36	ENSG00000139304	47.8756	3.18085	0.358967	8.86112	7.92163e-19	7.14764e-18	PTPRQ		36	ENSG00000132334	1277.18	-1.02972	0.0974799	-10.5634	4.40271e-26	6.22047e-25	PTPRE
		37	ENSG00000183762	184.757	3.16336	0.241486	13.0996	3.31206e-39	9.47249e-38	KREMEN1		37	ENSG00000111728	31.5136	-1.02981	0.361321	-2.85013	0.0043702	0.00864211	ST8SIA1
		38	ENSG00000130707	406.308	3.1371	0.150337	20.8671	1.06692e-96	2.09783e-94	ASS1		38	ENSG00000101844	577.881	-1.03113	0.090701	-11.3684	6.00737e-30	1.05255e-28	ATG4A
		39	ENSG00000149596	176.927	3.06013	0.242711	12.6081	1.90464e-36	4.74719e-35	JPH2		39	ENSG00000018236	61.211	-1.03121	0.275519	-3.7428	0.000181983	0.000452703	CNTN1
		40	ENSG00000081052	135.862	3.05223	0.228537	13.3555	1.09994e-40	3.34879e-39	COL4A4		40	ENSG00000102078	242.35	-1.03125	0.142768	-7.22327	5.07539e-13	3.01394e-12	SLC25A14
		41	ENSG00000158856	538.188	3.01165	0.173504	17.3578	1.72068e-67	1.44998e-65	DMTN		41	ENSG00000269951	47.6922	-1.03208	0.333705	-3.09279	0.00198287	0.00419854	NA
		42	ENSG00000185352	195.915	2.99587	0.234514	12.7748	2.26761e-37	5.91207e-36	HS6ST3		42	ENSG00000162441	2138.33	-1.03346	0.067487	-15.3135	6.20961e-53	3.00032e-51	LZIC
		43	ENSG00000155629	143.492	2.99439	0.279277	10.7219	8.03274e-27	1.18953e-25	PIK3AP1		43	ENSG00000150456	164.057	-1.03448	0.170894	-6.05334	1.41874e-09	6.32203e-09	EEF1AKMT1
		44	ENSG00000138395	248.566	2.94595	0.180309	16.3384	5.2658e-60	3.4999e-58	CDK15		44	ENSG00000188825	113.77	-1.03511	0.237748	-4.3538	1.33796e-05	3.87827e-05	LINC00910
		45	ENSG00000267279	127.166	2.93078	0.235714	12.4336	1.71677e-35	4.05747e-34			45	ENSG00000178537	557.992	-1.0354	0.094323	-10.9772	4.91934e-28	7.80752e-27	SLC25A20
		46	ENSG00000177096	74.4559	2.88031	0.297728	9.67429	3.87778e-22	4.3057e-21	PHETA2		46	ENSG00000198918	3230.95	-1.03586	0.0610007	-16.9812	1.13205e-64	8.80572e-63	RPL39
		47	ENSG00000154358	952.88	2.87643	0.116445	24.702	1.01884e-134	9.61577e-132	OBSCN		47	ENSG00000170677	946.547	-1.03673	0.0819566	-12.6497	1.12313e-36	2.81418e-35	SOCS6
		48	ENSG00000126878	582.3	2.84962	0.14429	19.7493	8.13313e-87	1.29372e-84	AIF1L		48	ENSG00000158825	679.187	-1.03709	0.244858	-4.23549	2.28054e-05	6.41096e-05	CDA
		49	ENSG00000197872	70.4433	2.83667	0.345897	8.20089	2.38613e-16	1.82696e-15	CYRIA		49	ENSG00000215105	43.309	-1.03745	0.318237	-3.25999	0.00111416	0.0024634	TTC3P1
		50	ENSG00000136114	84.8029	2.83061	0.275403	10.2781	8.84991e-25	1.15367e-23	THSD1		50	ENSG00000156959	195.464	-1.03793	0.20483	-5.06726	4.03576e-07	1.40345e-06	LHFPL4
		51	ENSG00000169306	127.007	2.82214	0.263601	10.7061	9.52803e-27	1.40509e-25	IL1RAPL1		51	ENSG00000119681	1375.43	-1.04035	0.125421	-8.29484	1.08728e-16	8.53724e-16	LTBP2
		52	ENSG00000030304	74.2399	2.80823	0.290268	9.67462	3.86517e-22	4.29507e-21	MUSK		52	ENSG00000203722	97.0074	-1.0412	0.21627	-4.81432	1.47699e-06	4.79582e-06	RAET1G
		53	ENSG00000153162	71.1815	2.78344	0.310683	8.95909	3.27354e-19	3.03295e-18	BMP6		53	ENSG00000005893	7065.49	-1.04124	0.0533324	-19.5236	6.92493e-85	1.03196e-82	LAMP2
		54	ENSG00000205181	142.029	2.77678	0.221609	12.5301	5.10995e-36	1.24298e-34	LINC00654		54	ENSG00000067225	171042	-1.04164	0.0572298	-18.201	5.06662e-74	5.64788e-72	PKM
		55	ENSG00000157601	173.787	2.77322	0.212943	13.0233	9.02254e-39	2.52435e-37	MX1		55	ENSG00000205683	447.458	-1.04256	0.121195	-8.60236	7.80965e-18	6.62043e-17	DPF3
		56	ENSG00000150051	102.261	2.75378	0.24532	11.2253	3.06428e-29	5.19532e-28	MKX		56	ENSG00000116649	7114.62	-1.04306	0.10119	-10.308	6.48493e-25	8.50854e-24	SRM
		57	ENSG00000071242	352.271	2.74074	0.159552	17.1777	3.8987e-66	3.13602e-64	RPS6KA2		57	ENSG00000125378	4410.53	-1.0436	0.225833	-4.62112	3.8167e-06	1.18442e-05	BMP4
		58	ENSG00000120162	102.879	2.73995	0.330407	8.29267	1.10731e-16	8.68483e-16	MOB3B		58	ENSG00000157227	21662.7	-1.04524	0.0428432	-24.3969	1.84683e-131	1.53798e-128	MMP14
		59	ENSG00000198795	212.39	2.72325	0.176252	15.4509	7.43948e-54	3.76145e-52	ZNF521		59	ENSG00000166979	301.255	-1.04543	0.145491	-7.18551	6.69581e-13	3.9464e-12	EVA1C
		60	ENSG00000164684	401.789	2.68036	0.150135	17.853	2.7415e-71	2.75259e-69	ZNF704		60	ENSG00000100055	115.867	-1.04563	0.323539	-3.23184	0.00122994	0.00269999	CYTH4
		61	ENSG00000167994	339.315	2.65371	0.181278	14.6388	1.58752e-48	6.68885e-47	RAB3IL1		61	ENSG00000271254	765.028	-1.0469	0.0768202	-13.6279	2.73189e-42	8.80987e-41	NA
		62	ENSG00000128965	546.82	2.63963	0.146004	18.0792	4.64717e-73	4.98409e-71	CHAC1		62	ENSG00000167552	2221.5	-1.04696	0.239905	-4.36408	1.27659e-05	3.71025e-05	TUBA1A
		63	ENSG00000157111	177.958	2.62916	0.207205	12.6887	6.83135e-37	1.73629e-35	TMEM171		63	ENSG00000078018	55.3002	-1.04775	0.265744	-3.94272	8.05643e-05	0.000210395	MAP2
		64	ENSG00000143631	2573.88	2.62768	0.181099	14.5097	1.05239e-47	4.29355e-46	FLG		64	ENSG00000165704	3459.82	-1.04844	0.0590652	-17.7505	1.70913e-70	1.68029e-68	HPRT1
		65	ENSG00000115468	453.761	2.59899	0.131741	19.7281	1.23767e-86	1.94685e-84	EFHD1		65	ENSG00000170915	244.025	-1.04882	0.389022	-2.69605	0.00701666	0.0133317	PAQR8
		66	ENSG00000160588	80.2756	2.59308	0.2817	9.20511	3.41317e-20	3.36258e-19	MPZL3		66	ENSG00000183298	43.6871	-1.05127	0.305909	-3.43654	0.000589195	0.00136428	RPSAP19
		67	ENSG00000121966	55.3501	2.59196	0.338923	7.64764	2.04708e-14	1.35613e-13	CXCR4		67	ENSG00000101972	7109.13	-1.05158	0.0552247	-19.0418	7.6883e-81	1.01723e-78	STAG2
		68	ENSG00000090776	775.832	2.57396	0.112349	22.9103	3.66695e-116	1.44203e-113	EFNB1		68	ENSG00000138604	2776.86	-1.05225	0.0588702	-17.8741	1.8764e-71	1.89744e-69	GLCE
		69	ENSG00000163638	325.995	2.5507	0.162402	15.7061	1.37302e-55	7.44747e-54	ADAMTS9		69	ENSG00000127329	122.004	-1.05254	0.204437	-5.14846	2.62631e-07	9.35127e-07	PTPRB
		70	ENSG00000006747	57.3558	2.53097	0.329264	7.68675	1.50918e-14	1.00924e-13	SCIN		70	ENSG00000157870	1761.76	-1.05471	0.0965408	-10.925	8.75671e-28	1.36982e-26	PRXL2B
		71	ENSG00000101210	1618.39	2.52606	0.104968	24.0652	5.79127e-128	4.09935e-125	EEF1A2		71	ENSG00000183087	12829.8	-1.05637	0.0548563	-19.257	1.2332e-82	1.72856e-80	GAS6
		72	ENSG00000115112	235.151	2.52256	0.250549	10.0681	7.64193e-24	9.47345e-23	TFCP2L1		72	ENSG00000156709	1935.74	-1.05676	0.0772364	-13.6822	1.29741e-42	4.2715e-41	AIFM1
		73	ENSG00000162782	39.5978	2.51797	0.382352	6.58548	4.53422e-11	2.29828e-10	TDRD5		73	ENSG00000068001	1357.63	-1.05819	0.0746175	-14.1815	1.19238e-45	4.46573e-44	HYAL2
		74	ENSG00000175445	282.435	2.51113	0.165936	15.1331	9.7972e-52	4.56247e-50	LPL		74	ENSG00000102024	12641.1	-1.05916	0.0571078	-18.5466	8.6877e-77	1.00813e-74	PLS3
		75	ENSG00000227372	169.607	2.50985	0.213639	11.7481	7.22521e-32	1.41869e-30	TP73-AS1		75	ENSG00000183691	1149.11	-1.05937	0.138999	-7.62145	2.5084e-14	1.64557e-13	NOG
		76	ENSG00000095397	253.189	2.50661	0.221885	11.2969	1.35948e-29	2.3644e-28	WHRN		76	ENSG00000242338	60.3334	-1.05997	0.289719	-3.65861	0.00025359	0.000616427	BMS1P4
		77	ENSG00000077942	412.67	2.50307	0.182864	13.6882	1.19422e-42	3.94092e-41	FBLN1		77	ENSG00000197696	152.386	-1.06199	0.16535	-6.42266	1.33912e-10	6.50459e-10	NMB
		78	ENSG00000149328	391.809	2.50234	0.138839	18.0233	1.27845e-72	1.34067e-70	GLB1L2		78	ENSG00000280002	710.736	-1.06216	0.10679	-9.94623	2.61929e-23	3.12395e-22	NA
		79	ENSG00000130675	236.423	2.4899	0.191876	12.9766	1.66067e-38	4.53863e-37	MNX1		79	ENSG00000284946	368.046	-1.06239	0.128357	-8.27688	1.26447e-16	9.89012e-16	NA
		80	ENSG00000253522	45.3014	2.48707	0.41488	5.99467	2.03898e-09	8.95343e-09	MIR3142HG		80	ENSG00000101888	569.946	-1.06269	0.0888955	-11.9544	6.1598e-33	1.28242e-31	NXT2
		81	ENSG00000091490	992.02	2.48692	0.129579	19.1923	4.29509e-82	5.90346e-80	SEL1L3		81	ENSG00000283445	259.985	-1.06521	0.134019	-7.9482	1.89247e-15	1.35723e-14	NA
		82	ENSG00000164619	138.607	2.45135	0.298362	8.21602	2.10365e-16	1.61855e-15	BMPER		82	ENSG00000187566	46.4817	-1.06613	0.339495	-3.14033	0.00168756	0.00362037	NHLRC1
		83	ENSG00000283162	123.98	2.44689	0.23977	10.2052	1.87986e-24	2.41937e-23			83	ENSG00000073060	2645.49	-1.06798	0.100824	-10.5926	3.22646e-26	4.59527e-25	SCARB1
		84	ENSG00000230836	203.505	2.434	0.261586	9.30477	1.34283e-20	1.34635e-19	LINC01293		84	ENSG00000153395	9585.2	-1.06924	0.0800544	-13.3564	1.08739e-40	3.3177e-39	LPCAT1
		85	ENSG00000204792	159.761	2.42632	0.281271	8.62628	6.33806e-18	5.40855e-17	LINC01291		85	ENSG00000109861	8849.86	-1.07091	0.0889841	-12.0348	2.3312e-33	4.97779e-32	CTSC
		86	ENSG00000162654	223.552	2.42038	0.246807	9.80675	1.05301e-22	1.21002e-21	GBP4		86	ENSG00000116285	12881.6	-1.07357	0.0474325	-22.6336	2.02222e-113	6.81634e-111	ERRFI1
		87	ENSG00000129514	129.775	2.41317	0.223424	10.8009	3.41027e-27	5.15252e-26	FOXA1		87	ENSG00000144821	86.3047	-1.07487	0.237753	-4.52094	6.15644e-06	1.86472e-05	MYH15
		88	ENSG00000111859	203.42	2.40883	0.211804	11.3729	5.70395e-30	1.00063e-28	NEDD9		88	ENSG00000263155	35.1133	-1.07676	0.348972	-3.08553	0.00203191	0.00429275	MYZAP
		89	ENSG00000167363	142.182	2.4082	0.244948	9.83151	8.23727e-23	9.48862e-22	FN3K		89	ENSG00000189337	649.999	-1.07768	0.104086	-10.3538	4.02295e-25	5.33767e-24	KAZN
		90	ENSG00000160145	49.4111	2.40739	0.334302	7.20126	5.96572e-13	3.52785e-12	KALRN		90	ENSG00000134531	13382.9	-1.07944	0.0636632	-16.9555	1.75275e-64	1.34857e-62	EMP1
		91	ENSG00000198435	86.685	2.39722	0.303847	7.88957	3.03234e-15	2.13682e-14	NRARP		91	ENSG00000188368	132.4	-1.08006	0.233968	-4.61625	3.90739e-06	1.21096e-05	PRR19
		92	ENSG00000130720	266.306	2.39303	0.239762	9.98083	1.84922e-23	2.23183e-22	FIBCD1		92	ENSG00000185133	41.3585	-1.08069	0.428557	-2.5217	0.0116788	0.0211537	INPP5J
		93	ENSG00000260231	42.1235	2.38105	0.356835	6.6727	2.51146e-11	1.29951e-10	KDM7A-DT		93	ENSG00000065618	668.671	-1.08072	0.092638	-11.666	1.90113e-31	3.62634e-30	COL17A1
		94	ENSG00000112655	2837.35	2.37031	0.0672523	35.245	4.08798e-272	5.78736e-268	PTK7		94	ENSG00000164674	86.1226	-1.08087	0.221327	-4.88359	1.0417e-06	3.44324e-06	SYTL3
		95	ENSG00000120324	69.2443	2.36544	0.317781	7.44363	9.79552e-14	6.13607e-13	PCDHB10		95	ENSG00000101856	4192.94	-1.08136	0.0615145	-17.579	3.57081e-69	3.32578e-67	PGRMC1
		96	ENSG00000101680	108.327	2.36035	0.256949	9.18603	4.07614e-20	3.99625e-19	LAMA1		96	ENSG00000085185	1004.84	-1.08241	0.0977675	-11.0712	1.72997e-28	2.79899e-27	BCORL1
		97	ENSG00000282057	544.103	2.34599	0.285466	8.21813	2.06703e-16	1.59211e-15	NA		97	ENSG00000223784	577.945	-1.08248	0.123346	-8.77596	1.69459e-18	1.49101e-17	LINP1
		98	ENSG00000115919	923.598	2.34473	0.240856	9.735	2.13826e-22	2.41213e-21	KYNU		98	ENSG00000255423	27.7855	-1.08311	0.364204	-2.97391	0.00294031	0.00600489	EBLN2
		99	ENSG00000137727	71.7432	2.33815	0.36316	6.43834	1.20789e-10	5.89049e-10	ARHGAP20		99	ENSG00000158246	347.568	-1.08371	0.143376	-7.5585	4.07729e-14	2.63692e-13	TENT5B
		100	ENSG00000153930	54.0109	2.3279	0.316777	7.3487	2.00141e-13	1.22552e-12	ANKFN1		100	ENSG00000130475	233.712	-1.08469	0.159272	-6.81028	9.74077e-12	5.19398e-11	FCHO1
		101	ENSG00000254860	81.8448	2.31115	0.241606	9.5658	1.11333e-21	1.20225e-20	TMEM9B-AS1		101	ENSG00000157625	1084.49	-1.0882	0.0736372	-14.7779	2.03543e-49	8.83915e-48	TAB3
		102	ENSG00000003249	194.431	2.30855	0.217926	10.5932	3.20288e-26	4.56628e-25	DBNDD1		102	ENSG00000110711	2296.99	-1.0924	0.0910414	-11.9989	3.60051e-33	7.56837e-32	AIP
		103	ENSG00000040608	61.1554	2.30108	0.313909	7.33041	2.2945e-13	1.39713e-12	RTN4R		103	ENSG00000029534	754.744	-1.09594	0.134146	-8.16974	3.09057e-16	2.35233e-15	ANK1
		104	ENSG00000166394	257.21	2.30087	0.148416	15.5029	3.31663e-54	1.71991e-52	CYB5R2		104	ENSG00000131724	3227.09	-1.09614	0.0590873	-18.5511	7.98567e-77	9.34323e-75	IL13RA1
		105	ENSG00000161544	75.0139	2.29998	0.331022	6.94812	3.70187e-12	2.04317e-11	CYGB		105	ENSG00000126001	11069.1	-1.09754	0.0677425	-16.2017	4.90469e-59	3.18513e-57	CEP250
		106	ENSG00000022556	785.665	2.28761	0.100898	22.6724	8.38971e-114	2.96933e-111	NLRP2		106	ENSG00000108175	7146.49	-1.09995	0.110478	-9.95625	2.36829e-23	2.83901e-22	ZMIZ1
		107	ENSG00000169116	463.391	2.28155	0.188163	12.1254	7.74911e-34	1.70348e-32	PARM1		107	ENSG00000188856	45.4574	-1.10258	0.313105	-3.52144	0.00042921	0.00101205	RPSAP47
		108	ENSG00000182379	211.521	2.27749	0.211297	10.7787	4.34194e-27	6.53924e-26	NXPH4		108	ENSG00000156103	710.984	-1.10382	0.116902	-9.4423	3.6467e-21	3.79885e-20	MMP16
		109	ENSG00000136999	651.147	2.27651	0.107029	21.2701	2.14836e-100	4.75224e-98	CCN3		109	ENSG00000241343	4034.63	-1.10512	0.0760676	-14.5281	8.0451e-48	3.30129e-46	RPL36A
		110	ENSG00000226887	94.5569	2.27393	0.289661	7.85029	4.15064e-15	2.89746e-14	ERVMER34-1		110	ENSG00000183760	81.9413	-1.10562	0.253137	-4.36766	1.25584e-05	3.65446e-05	ACP7
		111	ENSG00000173320	122.488	2.25858	0.277121	8.15016	3.63434e-16	2.74408e-15	STOX2		111	ENSG00000117906	4166.72	-1.10659	0.0551521	-20.0644	1.51146e-89	2.57804e-87	RCN2
		112	ENSG00000136167	1529.51	2.25154	0.132149	17.0378	4.30304e-65	3.40325e-63	LCP1		112	ENSG00000170381	85.4258	-1.10663	0.315994	-3.50205	0.000461698	0.0010836	SEMA3E
		113	ENSG00000170786	183.047	2.24788	0.173076	12.9878	1.4344e-38	3.95074e-37	SDR16C5		113	ENSG00000131697	914.727	-1.11156	0.0741195	-14.9968	7.70449e-51	3.46262e-49	NPHP4
		114	ENSG00000073150	181.19	2.2382	0.222707	10.05	9.19072e-24	1.13142e-22	PANX2		114	ENSG00000272888	1773.4	-1.11225	0.0680377	-16.3475	4.52875e-60	3.03855e-58	CHASERR
		115	ENSG00000147852	1059.28	2.23527	0.132853	16.8251	1.59716e-63	1.19635e-61	VLDLR		115	ENSG00000197776	41.1469	-1.11254	0.327931	-3.39259	0.000692345	0.00158781	KLHDC1
		116	ENSG00000240225	337.617	2.20227	0.153913	14.3085	1.93587e-46	7.52916e-45	ZNF542P		116	ENSG00000101966	2631.97	-1.11394	0.0521174	-21.3737	2.34847e-101	5.45037e-99	XIAP
		117	ENSG00000165323	437.843	2.18556	0.323298	6.76022	1.37778e-11	7.25639e-11	FAT3		117	ENSG00000182261	33.3062	-1.1168	0.410683	-2.71938	0.00654051	0.0125026	NLRP10
		118	ENSG00000140450	334.506	2.17839	0.173754	12.5372	4.67165e-36	1.14029e-34	ARRDC4		118	ENSG00000123562	11604.2	-1.1183	0.0584701	-19.126	1.53395e-81	2.08809e-79	MORF4L2
		119	ENSG00000137266	154.684	2.17152	0.229809	9.44927	3.41215e-21	3.56764e-20	SLC22A23		119	ENSG00000125676	5437.21	-1.11895	0.0481095	-23.2583	1.17117e-119	5.52676e-117	THOC2
		120	ENSG00000163359	722.923	2.15735	0.128148	16.8348	1.35613e-63	1.02121e-61	COL6A3		120	ENSG00000266714	68.7383	-1.12039	0.257731	-4.34714	1.37925e-05	3.9898e-05	MYO15B
		121	ENSG00000184254	472.945	2.15622	0.131745	16.3666	3.31349e-60	2.23377e-58	ALDH1A3		121	ENSG00000167549	40.2168	-1.12113	0.376016	-2.98161	0.00286733	0.00586856	CORO6
		122	ENSG00000272512	37.9775	2.15511	0.341115	6.31785	2.65233e-10	1.26088e-09	NA		122	ENSG00000233695	23.5605	-1.12394	0.420619	-2.67211	0.00753765	0.0142167	GAS6-AS1
		123	ENSG00000165929	99.843	2.15089	0.28173	7.63456	2.26584e-14	1.49406e-13	TC2N		123	ENSG00000152779	25.3238	-1.12421	0.394598	-2.84899	0.00438587	0.00866948	SLC16A12
		124	ENSG00000185745	1996.38	2.13256	0.242661	8.78823	1.51936e-18	1.34267e-17	IFIT1		124	ENSG00000162746	37.1211	-1.12561	0.33097	-3.40094	0.000671539	0.00154249	FCRLB
		125	ENSG00000109265	602.015	2.11982	0.111536	19.0058	1.52777e-80	1.98428e-78	CRACD		125	ENSG00000047597	738.337	-1.12632	0.111173	-10.1312	4.01851e-24	5.03006e-23	XK
		126	ENSG00000203326	269.376	2.11876	0.171681	12.3413	5.4296e-35	1.26011e-33	ZNF525		126	ENSG00000172340	2919.16	-1.12856	0.0709367	-15.9094	5.45308e-57	3.15099e-55	SUCLG2
		127	ENSG00000245680	459.718	2.10575	0.11209	18.7863	9.76882e-79	1.24592e-76	ZNF585B		127	ENSG00000196878	18773.6	-1.12884	0.0399499	-28.2565	1.18569e-175	1.67858e-172	LAMB3
		128	ENSG00000225361	132.425	2.10294	0.20752	10.1337	3.91641e-24	4.91095e-23	PPP1R26-AS1		128	ENSG00000132357	466.076	-1.12911	0.12999	-8.68615	3.74937e-18	3.23657e-17	CARD6
		129	ENSG00000126882	57.1764	2.09782	0.322059	6.51378	7.32846e-11	3.64543e-10	FAM78A		129	ENSG00000272622	1029.98	-1.12913	0.0946596	-11.9283	8.42391e-33	1.74098e-31	NA
		130	ENSG00000135114	684.342	2.09718	0.143571	14.6073	2.52243e-48	1.05651e-46	OASL		130	ENSG00000168306	228.229	-1.12942	0.190077	-5.94189	2.81748e-09	1.21756e-08	ACOX2
		131	ENSG00000178343	362.733	2.0871	0.13076	15.9613	2.37552e-57	1.40126e-55	SHISA3		131	ENSG00000138621	920.246	-1.12998	0.0897103	-12.5958	2.22594e-36	5.53825e-35	PPCDC
		132	ENSG00000119138	188.063	2.08168	0.256161	8.12648	4.41937e-16	3.31207e-15	KLF9		132	ENSG00000150893	221.704	-1.13232	0.15017	-7.54025	4.69066e-14	3.01707e-13	FREM2
		133	ENSG00000204291	97.8692	2.07599	0.311219	6.67052	2.54907e-11	1.31801e-10	COL15A1		133	ENSG00000081041	110.703	-1.13242	0.302629	-3.74194	0.000182607	0.000453893	CXCL2
		134	ENSG00000196724	190.394	2.0686	0.189936	10.8911	1.27138e-27	1.97141e-26	ZNF418		134	ENSG00000142875	1170.39	-1.13337	0.0882746	-12.8391	9.89814e-38	2.62412e-36	PRKACB
		135	ENSG00000130762	113.275	2.06131	0.247737	8.32056	8.75517e-17	6.92054e-16	ARHGEF16		135	ENSG00000129521	198.108	-1.13593	0.193111	-5.88227	4.04686e-09	1.72668e-08	EGLN3
		136	ENSG00000142552	109.936	2.05273	0.270011	7.60242	2.90652e-14	1.89708e-13	RCN3		136	ENSG00000237506	44.8479	-1.13808	0.375156	-3.0336	0.00241652	0.00502728	RPSAP15
		137	ENSG00000007516	242.789	2.04854	0.197373	10.379	3.08902e-25	4.11394e-24	BAIAP3		137	ENSG00000125352	692.821	-1.13986	0.0962734	-11.8398	2.42997e-32	4.90743e-31	RNF113A
		138	ENSG00000019102	47.1309	2.04261	0.339312	6.01985	1.74578e-09	7.7162e-09	VSIG2		138	ENSG00000273604	1002.47	-1.14024	0.0786217	-14.5028	1.16248e-47	4.72909e-46	EPOP
		139	ENSG00000213694	906.987	2.0351	0.121467	16.7544	5.26192e-63	3.82015e-61	S1PR3		139	ENSG00000101843	1696.51	-1.14407	0.09266	-12.347	5.05667e-35	1.17742e-33	PSMD10
		140	ENSG00000229373	570.889	2.02657	0.170766	11.8676	1.74476e-32	3.54894e-31	LINC00452		140	ENSG00000077420	2448.38	-1.14474	0.097894	-11.6936	1.37404e-31	2.6538e-30	APBB1IP
		141	ENSG00000232040	108.245	2.02599	0.213464	9.491	2.28825e-21	2.42113e-20	ZBED9		141	ENSG00000104381	501.967	-1.14491	0.115904	-9.87807	5.18225e-23	6.04824e-22	GDAP1
		142	ENSG00000197461	766.981	2.0229	0.10895	18.5672	5.92187e-77	6.98632e-75	PDGFA		142	ENSG00000085662	5108.91	-1.14646	0.0497863	-23.0276	2.46428e-117	1.05718e-114	AKR1B1
		143	ENSG00000147324	1591.38	2.02277	0.107756	18.7717	1.28678e-78	1.61212e-76	MFHAS1		143	ENSG00000134597	1109.19	-1.14661	0.0734029	-15.6207	5.26031e-55	2.82084e-53	RBMX2
		144	ENSG00000144152	106.85	2.02174	0.338482	5.97297	2.32973e-09	1.01577e-08	FBLN7		144	ENSG00000178035	17978.1	-1.14726	0.0540582	-21.2227	5.89831e-100	1.28465e-97	IMPDH2
		145	ENSG00000055163	270.507	2.02125	0.191454	10.5574	4.69643e-26	6.62884e-25	CYFIP2		145	ENSG00000139173	62.5722	-1.14731	0.2963	-3.87212	0.000107893	0.000277667	TMEM117
		146	ENSG00000105136	289.952	2.01769	0.151718	13.2989	2.34825e-40	7.0582e-39	ZNF419		146	ENSG00000184903	139.748	-1.14756	0.174669	-6.56993	5.03395e-11	2.54157e-10	IMMP2L
		147	ENSG00000254951	80.6139	1.98885	0.241022	8.25174	1.56108e-16	1.2123e-15	NA		147	ENSG00000013619	3244.41	-1.15359	0.0898634	-12.8372	1.01526e-37	2.68655e-36	MAMLD1
		148	ENSG00000126785	103.1	1.9798	0.293723	6.74037	1.57982e-11	8.27739e-11	RHOJ		148	ENSG00000247809	33.4821	-1.1554	0.38409	-3.00815	0.00262845	0.00542671	NR2F2-AS1
		149	ENSG00000158966	366.012	1.97854	0.130206	15.1955	3.7896e-52	1.78237e-50	CACHD1		149	ENSG00000228727	55.6217	-1.15585	0.277715	-4.16198	3.15493e-05	8.71501e-05	SAPCD1
		150	ENSG00000185112	499.941	1.97667	0.169128	11.6874	1.47855e-31	2.84788e-30	FAM43A		150	ENSG00000102804	9673.87	-1.16148	0.157777	-7.3615	1.81849e-13	1.11592e-12	TSC22D1
		151	ENSG00000099399	1030.97	1.97042	0.206103	9.56034	1.17373e-21	1.26457e-20	MAGEB2		151	ENSG00000147251	877.727	-1.1621	0.0917211	-12.6699	8.68469e-37	2.19552e-35	DOCK11
		152	ENSG00000269918	41.1594	1.9492	0.351809	5.54052	3.01583e-08	1.18171e-07	NA		152	ENSG00000196507	1894.94	-1.16226	0.0693401	-16.7617	4.64949e-63	3.39293e-61	TCEAL3
		153	ENSG00000104267	231.75	1.94407	0.172258	11.2858	1.54162e-29	2.66481e-28	CA2		153	ENSG00000128805	1266.25	-1.16403	0.0913798	-12.7384	3.61703e-37	9.32718e-36	ARHGAP22
		154	ENSG00000204642	175.308	1.94334	0.245068	7.92979	2.19517e-15	1.56481e-14	HLA-F		154	ENSG00000167306	670.635	-1.16415	0.0981974	-11.8552	2.02334e-32	4.09791e-31	MYO5B
		155	ENSG00000145945	220.18	1.93868	0.155808	12.4427	1.53204e-35	3.62695e-34	FAM50B		155	ENSG00000102796	62.2845	-1.1642	0.273243	-4.26069	2.03795e-05	5.76795e-05	DHRS12
		156	ENSG00000178814	228.548	1.93638	0.154855	12.5045	7.05718e-36	1.70492e-34	OPLAH		156	ENSG00000080819	4406.81	-1.16884	0.0756033	-15.4602	6.4416e-54	3.28035e-52	CPOX
		157	ENSG00000132359	1053.04	1.93522	0.0890633	21.7286	1.10173e-104	2.78521e-102	RAP1GAP2		157	ENSG00000133131	3823.1	-1.16925	0.109783	-10.6505	1.73388e-26	2.50219e-25	MORC4
		158	ENSG00000061455	56.7557	1.92907	0.29908	6.45002	1.11835e-10	5.4765e-10	PRDM6		158	ENSG00000108551	397.379	-1.17273	0.294126	-3.98716	6.687e-05	0.000176323	RASD1
		159	ENSG00000055732	532.971	1.92831	0.10361	18.6112	2.60877e-77	3.15661e-75	MCOLN3		159	ENSG00000102038	4093.94	-1.17279	0.076881	-15.2547	1.53228e-52	7.27934e-51	SMARCA1
		160	ENSG00000189056	297.628	1.92725	0.480473	4.01116	6.04222e-05	0.000160578	RELN		160	ENSG00000188906	180.487	-1.1748	0.211555	-5.55317	2.80537e-08	1.10291e-07	LRRK2
		161	ENSG00000129595	388.345	1.91145	0.121243	15.7654	5.38336e-56	2.98871e-54	EPB41L4A		161	ENSG00000134049	1731.13	-1.17528	0.065067	-18.0626	6.27536e-73	6.67972e-71	IER3IP1
		162	ENSG00000134716	115.56	1.89093	0.223152	8.47373	2.37656e-17	1.95269e-16	CYP2J2		162	ENSG00000196284	622.908	-1.17542	0.104572	-11.2404	2.58332e-29	4.40628e-28	SUPT3H
		163	ENSG00000212864	205.596	1.88962	0.1888	10.0086	1.39752e-23	1.6968e-22	RNF208		163	ENSG00000107874	1186.86	-1.17573	0.0786646	-14.9461	1.65107e-50	7.32734e-49	CUEDC2
		164	ENSG00000163624	97.921	1.88811	0.232322	8.12709	4.39719e-16	3.29719e-15	CDS1		164	ENSG00000242732	223.878	-1.17591	0.171174	-6.86966	6.43561e-12	3.49077e-11	RTL5
		165	ENSG00000128165	490.319	1.88571	0.112211	16.8051	2.24067e-63	1.66954e-61	ADM2		165	ENSG00000157600	1661.16	-1.17822	0.0764392	-15.4138	1.32173e-53	6.56551e-52	TMEM164
		166	ENSG00000163898	410.056	1.88519	0.18082	10.4258	1.89143e-25	2.55262e-24	LIPH		166	ENSG00000273149	151.088	-1.17842	0.190826	-6.17539	6.60016e-10	3.0288e-09	NA
		167	ENSG00000196839	56.1786	1.88493	0.304782	6.18451	6.22962e-10	2.86526e-09	ADA		167	ENSG00000171680	97.9082	-1.17906	0.237215	-4.97043	6.68037e-07	2.26309e-06	PLEKHG5
		168	ENSG00000157470	196.835	1.88484	0.187753	10.0389	1.02807e-23	1.26121e-22	FAM81A		168	ENSG00000078900	354.991	-1.18026	0.18633	-6.33426	2.38479e-10	1.1379e-09	TP73
		169	ENSG00000188738	358.411	1.87477	0.122884	15.2564	1.49319e-52	7.11755e-51	FSIP2		169	ENSG00000250697	396.463	-1.18117	0.133278	-8.86246	7.82698e-19	7.06674e-18	NA
		170	ENSG00000260077	69.0992	1.86529	0.293729	6.35038	2.14784e-10	1.029e-09	NA		170	ENSG00000287837	69.2393	-1.18149	0.287701	-4.10666	4.01424e-05	0.000109246	NA
		171	ENSG00000134709	181.736	1.86308	0.179283	10.3919	2.69982e-25	3.6126e-24	HOOK1		171	ENSG00000224281	33.5556	-1.18208	0.411381	-2.87344	0.00406028	0.00810283	SLC25A5-AS1
		172	ENSG00000079459	3891.32	1.86267	0.0776663	23.983	4.18275e-127	2.6916e-124	FDFT1		172	ENSG00000137968	136.067	-1.18245	0.218543	-5.41061	6.28115e-08	2.37316e-07	SLC44A5
		173	ENSG00000138449	127.097	1.85904	0.263262	7.06157	1.64637e-12	9.40586e-12	SLC40A1		173	ENSG00000100505	58.0597	-1.18625	0.268153	-4.42376	9.69973e-06	2.86022e-05	TRIM9
		174	ENSG00000283341	65.6925	1.85715	0.257559	7.21059	5.57108e-13	3.29861e-12	NA		174	ENSG00000275734	94.1599	-1.18724	0.210613	-5.63709	1.72952e-08	6.9303e-08	NA
		175	ENSG00000081665	523.914	1.85608	0.109161	17.0031	7.78627e-65	6.09007e-63	ZNF506		175	ENSG00000102181	6898.6	-1.18877	0.10613	-11.2011	4.02853e-29	6.78144e-28	CD99L2
		176	ENSG00000105655	352.203	1.85277	0.124635	14.8656	5.51538e-50	2.43244e-48	ISYNA1		176	ENSG00000197180	36.4936	-1.18979	0.373224	-3.18788	0.00143318	0.00311094	ATP6AP1-DT
		177	ENSG00000221923	178.041	1.84464	0.171011	10.7867	3.97773e-27	5.9971e-26	ZNF880		177	ENSG00000154217	707.491	-1.19198	0.102534	-11.6252	3.06807e-31	5.76822e-30	PITPNC1
		178	ENSG00000100154	981.953	1.84414	0.095038	19.4042	7.10742e-84	1.03732e-81	TTC28		178	ENSG00000077721	4313.07	-1.19222	0.0531572	-22.4282	2.08866e-111	6.87654e-109	UBE2A
		179	ENSG00000244486	438.489	1.83976	0.146435	12.5636	3.34552e-36	8.25132e-35	SCARF2		179	ENSG00000278023	116.24	-1.19265	0.225587	-5.28689	1.2441e-07	4.56881e-07	RDM1
		180	ENSG00000089486	513.999	1.83518	0.11463	16.0097	1.09405e-57	6.59082e-56	CDIP1		180	ENSG00000200534	20.1424	-1.19286	0.456075	-2.6155	0.00890981	0.0165143	SNORA33
		181	ENSG00000130529	254.584	1.8297	0.140603	13.0132	1.02923e-38	2.85701e-37	TRPM4		181	ENSG00000102452	444.821	-1.19466	0.125364	-9.52953	1.57995e-21	1.68682e-20	NALCN
		182	ENSG00000142102	502.536	1.82546	0.123743	14.752	2.98656e-49	1.28905e-47	PGGHG		182	ENSG00000133687	66.6872	-1.20023	0.270347	-4.43957	9.01382e-06	2.67411e-05	TMTC1
		183	ENSG00000276141	116.495	1.82316	0.22117	8.24326	1.67587e-16	1.29647e-15	WHAMMP3		183	ENSG00000224660	117.408	-1.20095	0.193576	-6.20401	5.50412e-10	2.54314e-09	SH3BP5-AS1
		184	ENSG00000166123	2011.32	1.81782	0.0783375	23.205	4.05072e-119	1.79206e-116	GPT2		184	ENSG00000102287	644.305	-1.20243	0.119449	-10.0665	7.77171e-24	9.62591e-23	GABRE
		185	ENSG00000170161	158.413	1.8175	0.196986	9.22656	2.79453e-20	2.76465e-19	FAM88B		185	ENSG00000167173	3270.04	-1.20339	0.0663732	-18.1306	1.82722e-73	1.97465e-71	C15orf39
		186	ENSG00000006459	228.04	1.81605	0.175722	10.3348	4.90394e-25	6.48833e-24	KDM7A		186	ENSG00000160072	2175.47	-1.20373	0.0983518	-12.239	1.92292e-34	4.34869e-33	ATAD3B
		187	ENSG00000214106	343.853	1.81586	0.154158	11.7792	4.99423e-32	9.93024e-31	PAXIP1-AS2		187	ENSG00000198513	460.497	-1.20465	0.161319	-7.46753	8.1712e-14	5.14589e-13	ATL1
		188	ENSG00000168477	314.088	1.81014	0.171091	10.58	3.68905e-26	5.22259e-25	TNXB		188	ENSG00000177352	1071.08	-1.21028	0.0692637	-17.4736	2.27861e-68	2.02882e-66	CCDC71
		189	ENSG00000115266	286.226	1.79428	0.160466	11.1817	5.01255e-29	8.37812e-28	APC2		189	ENSG00000135480	36597	-1.21068	0.0691061	-17.5192	1.02334e-68	9.34669e-67	KRT7
		190	ENSG00000204681	481.641	1.7917	0.149181	12.0102	3.13994e-33	6.63464e-32	GABBR1		190	ENSG00000124479	57.4794	-1.21625	0.299941	-4.05495	5.01447e-05	0.000134706	NDP
		191	ENSG00000196172	175.536	1.78835	0.205171	8.71643	2.87111e-18	2.50132e-17	ZNF681		191	ENSG00000239653	53.015	-1.21773	0.280902	-4.33507	1.45712e-05	4.20732e-05	PSMD6-AS2
		192	ENSG00000180626	363.26	1.78741	0.142036	12.5842	2.57886e-36	6.40507e-35	ZNF594		192	ENSG00000128604	61.9021	-1.2213	0.30997	-3.94006	8.14613e-05	0.000212619	IRF5
		193	ENSG00000285108	99.8247	1.78708	0.316676	5.64325	1.66873e-08	6.69811e-08	NA		193	ENSG00000101955	821.563	-1.22269	0.102571	-11.9205	9.25763e-33	1.90218e-31	SRPX
		194	ENSG00000067141	1534.09	1.78485	0.0886026	20.1445	3.01022e-90	5.3944e-88	NEO1		194	ENSG00000170385	2055.75	-1.22966	0.0698233	-17.611	2.02815e-69	1.90149e-67	SLC30A1
		195	ENSG00000112782	193.905	1.7828	0.208628	8.54535	1.28143e-17	1.07217e-16	CLIC5		195	ENSG00000226800	23.8258	-1.2322	0.4635	-2.65847	0.00784957	0.0147461	CACTIN-AS1
		196	ENSG00000279289	77.2813	1.78042	0.25273	7.04475	1.85791e-12	1.05421e-11	NA		196	ENSG00000166343	63.9845	-1.23247	0.271539	-4.53881	5.65727e-06	1.72162e-05	MSS51
		197	ENSG00000139998	714.996	1.77958	0.102516	17.3591	1.68398e-67	1.42755e-65	RAB15		197	ENSG00000018610	1186.7	-1.2327	0.0855166	-14.4147	4.17997e-47	1.67274e-45	STEEP1
		198	ENSG00000146966	251.327	1.77871	0.183302	9.70369	2.9079e-22	3.25947e-21	DENND2A		198	ENSG00000090530	4470.9	-1.23497	0.0630967	-19.5726	2.64719e-85	4.0297e-83	P3H2
		199	ENSG00000074047	375.39	1.77593	0.120845	14.6959	6.84544e-49	2.91024e-47	GLI2		199	ENSG00000186469	131.394	-1.23595	0.270774	-4.56449	5.00705e-06	1.53252e-05	GNG2
		200	ENSG00000176595	266.915	1.77347	0.169069	10.4896	9.64272e-26	1.32665e-24	KBTBD11		200	ENSG00000050438	269.358	-1.23646	0.149972	-8.24464	1.65653e-16	1.2829e-15	SLC4A8
		201	ENSG00000270804	108.358	1.77161	0.20327	8.71555	2.89362e-18	2.51937e-17	UBE2CP5		201	ENSG00000136147	455.067	-1.23696	0.11364	-10.8849	1.36113e-27	2.10596e-26	PHF11
		202	ENSG00000119922	3649.26	1.76627	0.188051	9.3925	5.85928e-21	6.03272e-20	IFIT2		202	ENSG00000171631	48.6642	-1.23731	0.433491	-2.8543	0.00431314	0.00855317	P2RY6
		203	ENSG00000099822	295.983	1.76469	0.223504	7.89556	2.89009e-15	2.03963e-14	HCN2		203	ENSG00000102053	27.5689	-1.2378	0.431827	-2.86643	0.00415129	0.00825766	ZC3H12B
		204	ENSG00000174804	772.455	1.76027	0.10934	16.099	2.59211e-58	1.63095e-56	FZD4		204	ENSG00000140391	7028.35	-1.23837	0.0565689	-21.8913	3.14419e-106	8.09313e-104	TSPAN3
		205	ENSG00000234380	75.1293	1.75751	0.259124	6.78248	1.1813e-11	6.25649e-11	LINC01426		205	ENSG00000154175	46.9568	-1.24125	0.340434	-3.64608	0.000266275	0.00064582	ABI3BP
		206	ENSG00000251369	252.955	1.75494	0.155873	11.2588	2.09615e-29	3.59699e-28	ZNF550		206	ENSG00000142621	18.7742	-1.24213	0.467091	-2.65929	0.00783057	0.0147143	FHAD1
		207	ENSG00000231806	104.049	1.75027	0.213162	8.21099	2.1938e-16	1.68425e-15	PCAT7		207	ENSG00000141401	560.343	-1.24275	0.173213	-7.17471	7.24632e-13	4.25492e-12	IMPA2
		208	ENSG00000128203	66.3947	1.74269	0.300393	5.80137	6.57739e-09	2.74436e-08	ASPHD2		208	ENSG00000206190	1154.1	-1.24284	0.0704495	-17.6416	1.18e-69	1.12116e-67	ATP10A
		209	ENSG00000069482	69.8084	1.73889	0.340043	5.11375	3.15827e-07	1.11306e-06	GAL		209	ENSG00000068366	8707.42	-1.24328	0.0874427	-14.2183	7.05885e-46	2.68635e-44	ACSL4
		210	ENSG00000167191	252.448	1.73015	0.190519	9.08125	1.0734e-19	1.02538e-18	GPRC5B		210	ENSG00000123384	3733.41	-1.24462	0.246262	-5.05404	4.32565e-07	1.5002e-06	LRP1
		211	ENSG00000198185	120.163	1.7285	0.209838	8.23731	1.76133e-16	1.36109e-15	ZNF334		211	ENSG00000102384	2685.29	-1.24477	0.0603884	-20.6128	2.1071e-94	3.97736e-92	CENPI
		212	ENSG00000008086	175.099	1.72445	0.179419	9.6113	7.16376e-22	7.82207e-21	CDKL5		212	ENSG00000203805	812.111	-1.24587	0.146509	-8.50372	1.83614e-17	1.51925e-16	PLPP4
		213	ENSG00000125089	157.935	1.7229	0.205474	8.38501	5.07229e-17	4.08466e-16	SH3TC1		213	ENSG00000067221	796.884	-1.24681	0.091145	-13.6794	1.34869e-42	4.43002e-41	STOML1
		214	ENSG00000125170	85.8055	1.71993	0.323875	5.31049	1.09334e-07	4.03924e-07	DOK4		214	ENSG00000101811	2248.36	-1.24744	0.0735025	-16.9713	1.33825e-64	1.03528e-62	CSTF2
		215	ENSG00000168056	1306.64	1.71988	0.282641	6.08504	1.16461e-09	5.22911e-09	LTBP3		215	ENSG00000196139	359.752	-1.24855	0.165037	-7.56526	3.87079e-14	2.50681e-13	AKR1C3
		216	ENSG00000237943	70.3315	1.71867	0.258185	6.65676	2.79928e-11	1.44212e-10	PRKCQ-AS1		216	ENSG00000185482	25.3928	-1.25005	0.458995	-2.72346	0.00646014	0.0123606	STAC3
		217	ENSG00000163110	9863.77	1.71754	0.0802312	21.4074	1.1396e-101	2.68888e-99	PDLIM5		217	ENSG00000130303	2139.37	-1.25504	0.103874	-12.0823	1.30944e-33	2.84322e-32	BST2
		218	ENSG00000197497	122.343	1.71545	0.215242	7.96985	1.58861e-15	1.1498e-14	ZNF665		218	ENSG00000087258	581.225	-1.2554	0.179055	-7.01129	2.36129e-12	1.33076e-11	GNAO1
		219	ENSG00000233593	53.3066	1.71227	0.310529	5.51405	3.50664e-08	1.36047e-07	LINC02609		219	ENSG00000130649	30.1798	-1.25604	0.447696	-2.80558	0.00502267	0.0098172	20
		220	ENSG00000177508	677.285	1.70822	0.107969	15.8214	2.21652e-56	1.25772e-54	IRX3		220	ENSG00000117122	412.338	-1.25731	0.127241	-9.8813	5.01798e-23	5.86619e-22	MFAP2
		221	ENSG00000204514	102.289	1.70503	0.244799	6.96503	3.28341e-12	1.82216e-11	ZNF814		221	ENSG00000119714	911.218	-1.26031	0.104314	-12.0819	1.31604e-33	2.85316e-32	GPR68
		222	ENSG00000177283	817.335	1.70218	0.107841	15.7842	3.99698e-56	2.23657e-54	FZD8		222	ENSG00000197956	35849.2	-1.26059	0.15181	-8.30375	1.00878e-16	7.93407e-16	S100A6
		223	ENSG00000101004	575.867	1.69827	0.123771	13.7211	7.59205e-43	2.55906e-41	NINL		223	ENSG00000237352	28.6942	-1.26065	0.402169	-3.13464	0.00172068	0.00368415	LINC01358
		224	ENSG00000155893	143.324	1.69716	0.211788	8.0135	1.11487e-15	8.16935e-15	PXYLP1		224	ENSG00000089682	870.181	-1.26247	0.079437	-15.8927	7.12386e-57	4.09969e-55	RBM41
		225	ENSG00000106541	137.934	1.69642	0.603014	2.81324	0.00490455	0.00961153	AGR2		225	ENSG00000165475	286.437	-1.26647	0.138374	-9.1525	5.56332e-20	5.40934e-19	CRYL1
		226	ENSG00000226919	37.2346	1.69509	0.375412	4.51527	6.32355e-06	1.91206e-05	NA		226	ENSG00000005022	19688.6	-1.26986	0.0577286	-21.9971	3.07078e-107	8.05056e-105	SLC25A5
		227	ENSG00000154589	64.472	1.69479	0.333148	5.08722	3.63357e-07	1.27265e-06	LY96		227	ENSG00000237813	47.957	-1.27105	0.293467	-4.33116	1.48326e-05	4.27842e-05	NA
		228	ENSG00000176593	130.29	1.68632	0.202502	8.32743	8.26143e-17	6.54122e-16	NA		228	ENSG00000144810	3743.67	-1.27181	0.170189	-7.47293	7.84277e-14	4.94786e-13	COL8A1
		229	ENSG00000151012	8478.51	1.68589	0.22077	7.63639	2.23397e-14	1.47374e-13	SLC7A11		229	ENSG00000069424	939.786	-1.27204	0.0979495	-12.9867	1.45585e-38	3.99427e-37	KCNAB2
		230	ENSG00000278897	54.2791	1.6847	0.346335	4.86437	1.14822e-06	3.77592e-06	NA		230	ENSG00000155962	29.7932	-1.27479	0.430587	-2.9606	0.00307044	0.00625082	CLIC2
		231	ENSG00000166741	133.009	1.68325	0.257796	6.52938	6.60404e-11	3.2955e-10	NNMT		231	ENSG00000143416	178.811	-1.27802	0.194799	-6.5607	5.35569e-11	2.69345e-10	SELENBP1
		232	ENSG00000140044	600.862	1.68174	0.118373	14.2072	8.26996e-46	3.13042e-44	JDP2		232	ENSG00000133138	343.571	-1.28012	0.138371	-9.25132	2.21747e-20	2.20146e-19	TBC1D8B
		233	ENSG00000281468	43.59	1.67424	0.360402	4.64547	3.39299e-06	1.0592e-05	NA		233	ENSG00000166681	3314.78	-1.28103	0.0613461	-20.8821	7.79417e-97	1.57632e-94	BEX3
		234	ENSG00000183671	440.204	1.67252	0.108392	15.4303	1.02353e-53	5.1202e-52	CMKLR2		234	ENSG00000178031	895.205	-1.28214	0.147941	-8.66654	4.45452e-18	3.8336e-17	ADAMTSL1
		235	ENSG00000269834	370.218	1.67227	0.113527	14.7302	4.12727e-49	1.77598e-47	ZNF528-AS1		235	ENSG00000101901	1016.41	-1.28246	0.088054	-14.5645	4.72681e-48	1.95665e-46	ALG13
		236	ENSG00000100276	35.3124	1.66658	0.34414	4.84275	1.28057e-06	4.19168e-06	RASL10A		236	ENSG00000182378	258.996	-1.2834	0.24912	-5.15174	2.58077e-07	9.19837e-07	PLCXD1
		237	ENSG00000182986	1132	1.66574	0.0832329	20.013	4.23934e-89	7.06075e-87	ZNF320		237	ENSG00000101882	830.085	-1.28376	0.0924964	-13.879	8.49182e-44	2.96836e-42	NKAP
		238	ENSG00000120328	98.5171	1.65501	0.222758	7.42964	1.08893e-13	6.79714e-13	PCDHB12		238	ENSG00000143375	252.335	-1.28509	0.142864	-8.99518	2.35852e-19	2.19379e-18	CGN
		239	ENSG00000171872	33.2239	1.65399	0.406528	4.06859	4.72982e-05	0.000127446	KLF17		239	ENSG00000185100	22.104	-1.28607	0.476641	-2.6982	0.0069715	0.0132548	ADSS1
		240	ENSG00000104870	211.832	1.65389	0.196931	8.39829	4.53025e-17	3.65649e-16	FCGRT		240	ENSG00000258725	45.5091	-1.28724	0.356184	-3.61397	0.00030154	0.000724648	PRC1-AS1
		241	ENSG00000054793	600.038	1.65248	0.146958	11.2445	2.46398e-29	4.2078e-28	ATP9A		241	ENSG00000100628	56.3211	-1.28789	0.415767	-3.09763	0.00195076	0.00413675	ASB2
		242	ENSG00000198467	818.803	1.64924	0.117729	14.0087	1.37876e-44	5.01778e-43	TPM2		242	ENSG00000156697	3041.03	-1.29353	0.107762	-12.0036	3.40244e-33	7.16791e-32	UTP14A
		243	ENSG00000159263	188.21	1.6486	0.193629	8.5142	1.67749e-17	1.39041e-16	SIM2		243	ENSG00000103227	64.7231	-1.29424	0.277126	-4.67024	3.00849e-06	9.4521e-06	LMF1
		244	ENSG00000138735	79.6844	1.64856	0.250931	6.56979	5.03859e-11	2.543e-10	PDE5A		244	ENSG00000266602	55.4591	-1.29921	0.281205	-4.62014	3.83483e-06	1.18978e-05	NA
		245	ENSG00000273132	202.393	1.64446	0.163653	10.0485	9.33114e-24	1.14771e-22	NA		245	ENSG00000185222	2602.6	-1.30044	0.0649441	-20.024	3.40274e-89	5.73484e-87	TCEAL9
		246	ENSG00000204389	186.74	1.64199	0.184022	8.92281	4.5462e-19	4.16843e-18	HSPA1A		246	ENSG00000226943	63.6459	-1.30383	0.262953	-4.9584	7.10755e-07	2.39918e-06	ALG1L5P
		247	ENSG00000186019	42.0173	1.63598	0.391212	4.18183	2.89167e-05	8.03797e-05	ZNF225-AS1		247	ENSG00000103196	659.254	-1.30516	0.151357	-8.62308	6.51749e-18	5.55163e-17	CRISPLD2
		248	ENSG00000135069	8819.24	1.63343	0.0555246	29.4181	3.22084e-190	1.13993e-186	PSAT1		248	ENSG00000075711	9355.37	-1.30655	0.0524157	-24.9267	3.81786e-137	3.86068e-134	DLG1
		249	ENSG00000070182	66.6722	1.63335	0.346778	4.71008	2.47614e-06	7.86332e-06	SPTB		249	ENSG00000158301	600.491	-1.30804	0.110189	-11.8709	1.67587e-32	3.41862e-31	GPRASP2
		250	ENSG00000106733	73.1577	1.61913	0.249523	6.48889	8.64688e-11	4.27572e-10	NMRK1		250	ENSG00000158301	600.491	-1.30804	0.110189	-11.8709	1.67587e-32	3.41862e-31	GPRASP2
		251	ENSG00000104643	898.085	1.61777	0.099144	16.3174	7.42351e-60	4.88813e-58	MTMR9		251	ENSG00000102385	80.4256	-1.3082	0.233466	-5.60339	2.10198e-08	8.35189e-08	DRP2
		252	ENSG00000239697	362.473	1.61768	0.11803	13.7056	9.39715e-43	3.14505e-41	TNFSF12		252	ENSG00000137642	608.077	-1.30862	0.129306	-10.1204	4.48802e-24	5.59796e-23	SORL1
		253	ENSG00000169432	181.541	1.61702	0.204146	7.92091	2.35785e-15	1.67571e-14	SCN9A		253	ENSG00000176597	1157.53	-1.30914	0.0916499	-14.2842	2.74629e-46	1.06227e-44	B3GNT5
		254	ENSG00000181894	180.619	1.61607	0.212229	7.61476	2.64175e-14	1.72985e-13	ZNF329		254	ENSG00000117984	20529.1	-1.31147	0.220541	-5.94658	2.73805e-09	1.18431e-08	CTSD
		255	ENSG00000110852	194.618	1.61541	0.214242	7.54012	4.6955e-14	3.01881e-13	CLEC2B		255	ENSG00000183128	49.5247	-1.31159	0.361838	-3.6248	0.000289182	0.0006972	CALHM3
		256	ENSG00000100342	729.912	1.6115	0.134354	11.9944	3.80206e-33	7.97419e-32	APOL1		256	ENSG00000139684	1639.26	-1.31337	0.0628521	-20.8961	5.80507e-97	1.19105e-94	ESD
		257	ENSG00000186567	233.767	1.60938	0.146645	10.9747	5.05558e-28	8.01477e-27	CEACAM19		257	ENSG00000238117	80.8173	-1.31443	0.2231	-5.89165	3.82369e-09	1.63491e-08	NA
		258	ENSG00000122641	319.532	1.60785	0.149611	10.7469	6.12977e-27	9.15392e-26	INHBA		258	ENSG00000250072	116.229	-1.31492	0.219786	-5.98275	2.19403e-09	9.60448e-09	SH3TC2-DT
		259	ENSG00000268119	268.805	1.6058	0.167015	9.61472	6.92984e-22	7.5838e-21	NA		259	ENSG00000176171	6157.93	-1.3162	0.161411	-8.15437	3.50991e-16	2.65437e-15	BNIP3
		260	ENSG00000215182	1436.42	1.60032	0.69291	2.30957	0.0209122	0.0359551	MUC5AC		260	ENSG00000142156	8214.38	-1.31659	0.201888	-6.52139	6.96606e-11	3.4676e-10	COL6A1
		261	ENSG00000153404	156.499	1.59748	0.23104	6.91433	4.70087e-12	2.56951e-11	PLEKHG4B		261	ENSG00000164379	1025.01	-1.31809	0.145966	-9.03008	1.71546e-19	1.61474e-18	FOXQ1
		262	ENSG00000183638	54.6012	1.59702	0.424706	3.76028	0.000169723	0.000424637	RP1L1		262	ENSG00000137819	1802.07	-1.32688	0.0904843	-14.6642	1.09257e-48	4.63098e-47	PAQR5
		263	ENSG00000236423	56.4339	1.59659	0.296625	5.38252	7.34483e-08	2.75081e-07	LINC01134		263	ENSG00000196440	432.76	-1.33533	0.13086	-10.2042	1.89844e-24	2.44108e-23	ARMCX4
		264	ENSG00000139344	119.577	1.59561	0.204816	7.79048	6.67571e-15	4.5811e-14	AMDHD1		264	ENSG00000256377	74.7694	-1.33558	0.228249	-5.85143	4.87376e-09	2.06519e-08	MRPS35-DT
		265	ENSG00000238113	94.5878	1.59333	0.230355	6.91685	4.61785e-12	2.52608e-11	LINC01410		265	ENSG00000125731	512.918	-1.33684	0.112802	-11.8512	2.12201e-32	4.29162e-31	SH2D3A
		266	ENSG00000119917	4700.15	1.59089	0.107791	14.759	2.69071e-49	1.16491e-47	IFIT3		266	ENSG00000171155	1176.81	-1.34196	0.0721354	-18.6034	3.01757e-77	3.62032e-75	C1GALT1C1
		267	ENSG00000196155	1712.28	1.58874	0.0716321	22.1791	5.46071e-109	1.64484e-106	PLEKHG4		267	ENSG00000114812	271.198	-1.34525	0.169011	-7.95956	1.72652e-15	1.24262e-14	VIPR1
		268	ENSG00000105711	201.548	1.58621	0.225349	7.03889	1.9377e-12	1.09816e-11	SCN1B		268	ENSG00000136859	481.6	-1.35515	0.330665	-4.09824	4.16297e-05	0.000113076	ANGPTL2
		269	ENSG00000227388	48.1809	1.5836	0.326167	4.85518	1.20277e-06	3.95163e-06	NA		269	ENSG00000025708	202.604	-1.35571	0.211424	-6.41228	1.43356e-10	6.94795e-10	TYMP
		270	ENSG00000177076	61.9831	1.58334	0.356399	4.4426	8.88782e-06	2.63895e-05	ACER2		270	ENSG00000103811	495.565	-1.35625	0.106933	-12.6832	7.32861e-37	1.85934e-35	CTSH
		271	ENSG00000258667	273.696	1.57867	0.190796	8.27412	1.29406e-16	1.0116e-15	HIF1A-AS3		271	ENSG00000065621	37.3137	-1.35916	0.345279	-3.9364	8.27135e-05	0.000215753	GSTO2
		272	ENSG00000149260	1070.87	1.57851	0.109767	14.3806	6.84957e-47	2.72386e-45	CAPN5		272	ENSG00000200087	38.7126	-1.36076	0.388611	-3.50161	0.000462459	0.0010852	SNORA73B
		273	ENSG00000286523	118.911	1.57587	0.225262	6.99573	2.6388e-12	1.48068e-11	NA		273	ENSG00000158315	105.964	-1.36109	0.265813	-5.1205	3.04724e-07	1.07607e-06	RHBDL2
		274	ENSG00000148175	1207.5	1.57462	0.0998766	15.7656	5.36335e-56	2.98871e-54	STOM		274	ENSG00000186416	1607.09	-1.3636	0.078931	-17.2759	7.14784e-67	5.84925e-65	NKRF
		275	ENSG00000198203	99.1426	1.57386	0.297222	5.29524	1.1886e-07	4.37633e-07	SULT1C2		275	ENSG00000175175	264.717	-1.36517	0.140539	-9.71378	2.63394e-22	2.95473e-21	PPM1E
		276	ENSG00000124613	153.306	1.5735	0.167302	9.40512	5.19727e-21	5.37064e-20	ZNF391		276	ENSG00000183779	1362.25	-1.36528	0.0986859	-13.8346	1.57651e-43	5.43033e-42	ZNF703
		277	ENSG00000165138	1669.96	1.5731	0.0800548	19.6503	5.74274e-86	8.93407e-84	ANKS6		277	ENSG00000168497	1470.29	-1.37207	0.119541	-11.4778	1.70549e-30	3.09149e-29	CAVIN2
		278	ENSG00000062370	174.601	1.56963	0.171538	9.15031	5.67691e-20	5.51599e-19	ZNF112		278	ENSG00000126945	3670.1	-1.37235	0.0485437	-28.2704	7.99405e-176	1.25746e-172	HNRNPH2
		279	ENSG00000166839	35.5799	1.56841	0.368217	4.25947	2.04915e-05	5.79615e-05	ANKDD1A		279	ENSG00000146411	91.7683	-1.37554	0.34382	-4.00075	6.31431e-05	0.000167212	SLC2A12
		280	ENSG00000109794	59.815	1.56639	0.355311	4.4085	1.04088e-05	3.05974e-05	FAM149A		280	ENSG00000118257	621.488	-1.37561	0.102396	-13.4342	3.8095e-41	1.1853e-39	NRP2
		281	ENSG00000197183	379.241	1.56546	0.192095	8.14941	3.65699e-16	2.7597e-15	NOL4L		281	ENSG00000165675	870.272	-1.37732	0.0875508	-15.7317	9.17058e-56	5.01266e-54	ENOX2
		282	ENSG00000165181	30.9013	1.56352	0.389112	4.01818	5.86503e-05	0.000156103	SHOC1		282	ENSG00000114268	809.631	-1.3777	0.140857	-9.78088	1.36016e-22	1.55414e-21	PFKFB4
		283	ENSG00000172738	42.0567	1.56208	0.333696	4.68114	2.85288e-06	8.98915e-06	TMEM217		283	ENSG00000063761	46.0555	-1.37877	0.337501	-4.08524	4.40312e-05	0.000119227	ADCK1
		284	ENSG00000003987	96.417	1.56031	0.274658	5.68092	1.33975e-08	5.43774e-08	MTMR7		284	ENSG00000185033	3483.29	-1.37973	0.0890733	-15.4898	4.06514e-54	2.08515e-52	SEMA4B
		285	ENSG00000249743	126.758	1.56027	0.238033	6.55484	5.57021e-11	2.79636e-10	NA		285	ENSG00000145040	406.831	-1.38396	0.157386	-8.79341	1.4509e-18	1.28457e-17	UCN2
		286	ENSG00000237807	852.032	1.55933	0.120504	12.94	2.6754e-38	7.25586e-37	LINC02984		286	ENSG00000196405	522.156	-1.38541	0.117839	-11.7568	6.51688e-32	1.28316e-30	EVL
		287	ENSG00000150054	84.2416	1.55897	0.254642	6.12219	9.22952e-10	4.18253e-09	MPP7		287	ENSG00000198929	174.926	-1.38711	0.161445	-8.59185	8.55825e-18	7.23338e-17	NOS1AP
		288	ENSG00000137261	46.3231	1.55862	0.3247	4.80018	1.58522e-06	5.12959e-06	KIAA0319		288	ENSG00000121361	48.9998	-1.39046	0.341018	-4.07739	4.55443e-05	0.000123095	KCNJ8
		289	ENSG00000187140	46.4007	1.55637	0.349877	4.44835	8.6534e-06	2.57636e-05	FOXD3		289	ENSG00000106366	22244.9	-1.3933	0.287429	-4.84745	1.25061e-06	4.0974e-06	SERPINE1
		290	ENSG00000196110	1094.34	1.5561	0.097266	15.9984	1.31089e-57	7.79758e-56	ZNF699		290	ENSG00000170364	310.011	-1.40358	0.139349	-10.0724	7.318e-24	9.09578e-23	SETMAR
		291	ENSG00000174080	620.313	1.55385	0.155139	10.0158	1.29897e-23	1.58258e-22	CTSF		291	ENSG00000120833	1064.65	-1.40623	0.0968478	-14.52	9.05702e-48	3.70579e-46	SOCS2
		292	ENSG00000272398	518.073	1.55216	0.152282	10.1927	2.1383e-24	2.72474e-23	CD24		292	ENSG00000188706	1760.48	-1.40926	0.0636901	-22.1269	1.74218e-108	5.13833e-106	ZDHHC9
		293	ENSG00000220201	39.0149	1.55203	0.327218	4.74311	2.10466e-06	6.72741e-06	ZGLP1		293	ENSG00000247095	109.13	-1.41158	0.669021	-2.10991	0.034866	0.0571492	MIR210HG
		294	ENSG00000198440	194.676	1.54885	0.177785	8.71195	2.98698e-18	2.59587e-17	ZNF583		294	ENSG00000149527	72.783	-1.41524	0.310055	-4.56446	5.00771e-06	1.53252e-05	PLCH2
		295	ENSG00000283689	30.6676	1.54842	0.392849	3.94153	8.09648e-05	0.000211401	NA		295	ENSG00000123096	70.5192	-1.41583	0.274856	-5.15117	2.5887e-07	9.22198e-07	SSPN
		296	ENSG00000254887	46.3002	1.54566	0.305414	5.06088	4.17324e-07	1.44983e-06	POU2F2-AS1		296	ENSG00000153944	1441.72	-1.41853	0.134592	-10.5396	5.67691e-26	7.97302e-25	MSI2
		297	ENSG00000198963	92.9065	1.54362	0.27871	5.53846	3.05144e-08	1.19467e-07	RORB		297	ENSG00000140332	4032.47	-1.42082	0.182038	-7.80506	5.94744e-15	4.10122e-14	TLE3
		298	ENSG00000164744	64.0054	1.54296	0.358434	4.30474	1.67183e-05	4.78434e-05	SUN3		298	ENSG00000186792	212.876	-1.42411	0.151066	-9.42711	4.21548e-21	4.37206e-20	HYAL3
		299	ENSG00000277559	29.0486	1.54266	0.404814	3.81078	0.000138528	0.000350831	NA		299	ENSG00000122884	2712.68	-1.42951	0.112078	-12.7546	2.94025e-37	7.63764e-36	P4HA1
		300	ENSG00000160182	47.1463	1.54246	0.352655	4.37385	1.22077e-05	3.55971e-05	TFF1		300	ENSG00000123095	370.437	-1.43069	0.296722	-4.82163	1.42387e-06	4.62969e-06	BHLHE41
		301	ENSG00000204604	818.449	1.53529	0.0953617	16.0997	2.56477e-58	1.62095e-56	ZNF468		301	ENSG00000106976	809.283	-1.43271	0.125161	-11.4469	2.43581e-30	4.37057e-29	DNM1
		302	ENSG00000163393	478.656	1.52902	0.129172	11.8371	2.51047e-32	5.06278e-31	SLC22A15		302	ENSG00000246985	57.6409	-1.4367	0.260916	-5.50638	3.66291e-08	1.41954e-07	SOCS2-AS1
		303	ENSG00000216775	1141.94	1.52833	0.0911268	16.7715	3.94395e-63	2.89298e-61	NA		303	ENSG00000127720	131.257	-1.43711	0.215484	-6.66919	2.57216e-11	1.32947e-10	METTL25
		304	ENSG00000179546	274.267	1.52689	0.139374	10.9554	6.26309e-28	9.87379e-27	HTR1D		304	ENSG00000179403	336.185	-1.43952	0.181581	-7.92769	2.23254e-15	1.59064e-14	VWA1
		305	ENSG00000137965	1472.62	1.52379	0.0789369	19.3039	4.98017e-83	7.05043e-81	IFI44		305	ENSG00000196754	1559.83	-1.44304	0.105373	-13.6945	1.09443e-42	3.63705e-41	S100A2
		306	ENSG00000167103	79.8845	1.52356	0.290047	5.25279	1.49809e-07	5.45766e-07	PIP5KL1		306	ENSG00000083444	4046.17	-1.44559	0.089851	-16.0888	3.05715e-58	1.91505e-56	PLOD1
		307	ENSG00000185904	165.834	1.52342	0.186659	8.16148	3.30958e-16	2.51226e-15	LINC00839		307	ENSG00000185442	381.971	-1.45	0.171605	-8.44963	2.92217e-17	2.38164e-16	FAM174B
		308	ENSG00000213762	979.547	1.52339	0.0939213	16.2198	3.65295e-59	2.38317e-57	ZNF134		308	ENSG00000162804	316.707	-1.45693	0.423527	-3.44	0.000581718	0.00134785	SNED1
		309	ENSG00000239605	60.1272	1.5233	0.327133	4.65651	3.21617e-06	1.00622e-05	STPG4		309	ENSG00000184867	2046.97	-1.4583	0.0895322	-16.288	1.20096e-59	7.87129e-58	ARMCX2
		310	ENSG00000115525	368.262	1.5225	0.203192	7.49291	6.73611e-14	4.26299e-13	ST3GAL5		310	ENSG00000171310	5125.27	-1.45925	0.0506293	-28.8222	1.1315e-182	2.66978e-179	CHST11
		311	ENSG00000249550	346.547	1.52023	0.131579	11.5538	7.06354e-31	1.30717e-29	LINC01234		311	ENSG00000185909	212.824	-1.46195	0.191114	-7.64961	2.01586e-14	1.33607e-13	KLHDC8B
		312	ENSG00000090971	964.141	1.51972	0.109337	13.8995	6.38273e-44	2.25901e-42	NAT14		312	ENSG00000132329	402.45	-1.46373	0.165477	-8.84554	9.10888e-19	8.18239e-18	RAMP1
		313	ENSG00000249740	44.4425	1.51962	0.35631	4.26489	2.00001e-05	5.66963e-05	OSMR-DT		313	ENSG00000163637	651.536	-1.46991	0.112589	-13.0556	5.90476e-39	1.66521e-37	PRICKLE2
		314	ENSG00000268205	300.687	1.51921	0.135318	11.2269	3.00689e-29	5.10414e-28	NA		314	ENSG00000178585	1687.03	-1.47	0.112528	-13.0634	5.33066e-39	1.50631e-37	CTNNBIP1
		315	ENSG00000197714	135.762	1.51712	0.200137	7.58037	3.44558e-14	2.23757e-13	ZNF460		315	ENSG00000076770	1243.01	-1.47966	0.0821303	-18.0161	1.45769e-72	1.51739e-70	MBNL3
		316	ENSG00000143845	203.597	1.51416	0.162238	9.33296	1.02958e-20	1.04187e-19	ETNK2		316	ENSG00000004799	79.154	-1.48191	0.293491	-5.04926	4.43534e-07	1.53748e-06	PDK4
		317	ENSG00000010438	134.175	1.5123	0.233178	6.4856	8.83771e-11	4.36094e-10	PRSS3		317	ENSG00000101935	1232.49	-1.48518	0.0861486	-17.2398	1.33497e-66	1.08616e-64	AMMECR1
		318	ENSG00000075275	2503.48	1.51037	0.176266	8.56869	1.0467e-17	8.82028e-17	CELSR1		318	ENSG00000239713	151.089	-1.48723	0.463906	-3.2059	0.00134643	0.00293658	APOBEC3G
		319	ENSG00000153064	236.395	1.50983	0.14342	10.5274	6.46127e-26	9.02093e-25	BANK1		319	ENSG00000120708	3091.79	-1.49492	0.118066	-12.6617	9.63495e-37	2.41848e-35	TGFBI
		320	ENSG00000215548	160.991	1.50173	0.194965	7.70258	1.33349e-14	8.95126e-14	FRG1JP		320	ENSG00000197457	665.049	-1.50573	0.154707	-9.73274	2.18613e-22	2.46018e-21	STMN3
		321	ENSG00000272768	37.6183	1.50163	0.351912	4.26705	1.98072e-05	5.62059e-05	NA		321	ENSG00000188153	465.838	-1.50695	0.117294	-12.8476	8.87753e-38	2.36239e-36	COL4A5
		322	ENSG00000187608	2178.31	1.50058	0.0931169	16.115	2.00249e-58	1.27127e-56	ISG15		322	ENSG00000144681	1523.49	-1.5156	0.0793936	-19.0897	3.07669e-81	4.14826e-79	STAC
		323	ENSG00000136237	177.694	1.49997	0.192587	7.78854	6.77896e-15	4.6452e-14	RAPGEF5		323	ENSG00000203930	376.467	-1.51734	0.124251	-12.2119	2.68643e-34	6.01769e-33	LINC00632
		324	ENSG00000080031	37.3346	1.49665	0.328967	4.54954	5.37637e-06	1.63967e-05	PTPRH		324	ENSG00000178802	1660.09	-1.51734	0.0863689	-17.5681	4.32184e-69	3.99898e-67	MPI
		325	ENSG00000184584	1041.94	1.49092	0.0961315	15.5091	3.00943e-54	1.56634e-52	STING1		325	ENSG00000196782	140.22	-1.51804	0.248846	-6.10031	1.05862e-09	4.76834e-09	MAML3
		326	ENSG00000225177	36.7956	1.48701	0.375975	3.95509	7.65053e-05	0.000200349	NHSL1-AS1		326	ENSG00000178695	2296.35	-1.52005	0.124062	-12.2524	1.63179e-34	3.71402e-33	KCTD12
		327	ENSG00000198626	64.699	1.48598	0.296835	5.00609	5.55474e-07	1.9027e-06	RYR2		327	ENSG00000239887	368.913	-1.52856	0.122717	-12.4559	1.29822e-35	3.08371e-34	C1orf226
		328	ENSG00000213793	426.2	1.48344	0.135721	10.9301	8.27558e-28	1.29599e-26	ZNF888		328	ENSG00000002079	52.4504	-1.53521	0.344044	-4.46225	8.11047e-06	2.42543e-05	MYH16
		329	ENSG00000248334	69.9718	1.48146	0.332422	4.45658	8.32779e-06	2.48674e-05	WHAMMP2		329	ENSG00000112769	226.856	-1.53951	0.165449	-9.30504	1.33938e-20	1.34384e-19	LAMA4
		330	ENSG00000229474	64.4476	1.48094	0.286605	5.16719	2.37635e-07	8.49761e-07	PATL2		330	ENSG00000125962	840.845	-1.5427	0.105403	-14.6362	1.6501e-48	6.93189e-47	ARMCX5
		331	ENSG00000261455	177.006	1.47969	0.199573	7.41428	1.22292e-13	7.60336e-13	LINC01003		331	ENSG00000156453	67.8912	-1.54471	0.28558	-5.40901	6.33727e-08	2.39245e-07	PCDH1
		332	ENSG00000136895	113.774	1.47922	0.209283	7.06802	1.57163e-12	9.0043e-12	GARNL3		332	ENSG00000005001	31.4511	-1.55076	0.343472	-4.51495	6.33329e-06	1.91459e-05	PRSS22
		333	ENSG00000278175	242.345	1.47862	0.143991	10.2688	9.7385e-25	1.26833e-23	GLIDR		333	ENSG00000188859	51.2822	-1.55085	0.300998	-5.15235	2.57238e-07	9.17078e-07	FAM78B
		334	ENSG00000163362	306.404	1.47771	0.179143	8.24878	1.60014e-16	1.24127e-15	INAVA		334	ENSG00000148671	495.092	-1.55272	0.17416	-8.91548	4.85705e-19	4.44194e-18	ADIRF
		335	ENSG00000170954	228.604	1.47614	0.19767	7.46769	8.16129e-14	5.14194e-13	ZNF415		335	ENSG00000253363	52.0749	-1.57002	0.326094	-4.81464	1.47464e-06	4.78928e-06	NA
		336	ENSG00000167555	659.094	1.47574	0.103576	14.2478	4.62356e-46	1.77869e-44	ZNF528		336	ENSG00000072195	403.086	-1.58191	0.170824	-9.26043	2.03619e-20	2.02859e-19	SPEG
		337	ENSG00000186205	373.39	1.47462	0.127354	11.5789	5.27132e-31	9.78061e-30	MTARC1		337	ENSG00000118898	736.714	-1.58954	0.619166	-2.56723	0.0102515	0.0187895	PPL
		338	ENSG00000135525	52.2019	1.46893	0.326983	4.49237	7.04346e-06	2.12294e-05	MAP7		338	ENSG00000181634	47.4851	-1.59313	0.318297	-5.00519	5.5808e-07	1.91024e-06	TNFSF15
		339	ENSG00000204650	409.524	1.46882	0.119692	12.2717	1.28525e-34	2.95379e-33	LINC02210		339	ENSG00000261379	163.425	-1.60208	0.162251	-9.8741	5.39152e-23	6.28729e-22	NA
		340	ENSG00000174365	233.968	1.46762	0.134966	10.874	1.53304e-27	2.36419e-26	SNHG11		340	ENSG00000185432	160.225	-1.60969	0.42976	-3.74555	0.000180002	0.000448406	METTL7A
		341	ENSG00000279673	27.9741	1.46663	0.418767	3.50225	0.000461346	0.00108313	NA		341	ENSG00000084764	155.258	-1.6125	0.220956	-7.29782	2.92461e-13	1.77166e-12	MAPRE3
		342	ENSG00000112852	169.36	1.46617	0.180585	8.11901	4.69995e-16	3.51676e-15	PCDHB2		342	ENSG00000132688	543.596	-1.61263	0.268327	-6.00994	1.85594e-09	8.18269e-09	NES
		343	ENSG00000145107	248.767	1.46398	0.154573	9.47111	2.76891e-21	2.91013e-20	TM4SF19		343	ENSG00000166033	1467.1	-1.61396	0.269958	-5.97858	2.25096e-09	9.8415e-09	HTRA1
		344	ENSG00000072954	625.773	1.46357	0.11103	13.1817	1.11861e-39	3.25846e-38	TMEM38A		344	ENSG00000074410	525.07	-1.61782	0.165463	-9.77757	1.40542e-22	1.60326e-21	CA12
		345	ENSG00000255310	99.5779	1.46164	0.209957	6.9616	3.36426e-12	1.86556e-11	NA		345	ENSG00000166106	2187.78	-1.62267	0.233375	-6.95307	3.57424e-12	1.97659e-11	ADAMTS15
		346	ENSG00000178826	49.3763	1.46099	0.379042	3.85444	0.000115996	0.000297438	TMEM139		346	ENSG00000244242	63.5394	-1.62919	0.290581	-5.60666	2.06265e-08	8.20253e-08	IFITM10
		347	ENSG00000259953	261.683	1.4595	0.146987	9.92943	3.10024e-23	3.67281e-22	LINC02977		347	ENSG00000131620	47.0581	-1.6334	0.468614	-3.48559	0.00049105	0.00114944	ANO1
		348	ENSG00000131471	139.371	1.45724	0.225418	6.46463	1.01545e-10	4.98636e-10	AOC3		348	ENSG00000242147	114.956	-1.63873	0.2662	-6.156	7.46073e-10	3.40715e-09	LASTR
		349	ENSG00000262580	242.002	1.45501	0.186763	7.79066	6.66609e-15	4.57671e-14	NA		349	ENSG00000242147	114.956	-1.63873	0.2662	-6.156	7.46073e-10	3.40715e-09	LASTR
		350	ENSG00000113532	436.388	1.45247	0.144343	10.0626	8.08125e-24	9.99181e-23	ST8SIA4		350	ENSG00000108984	70.1714	-1.63919	0.436825	-3.75251	0.000175072	0.00043697	MAP2K6
		351	ENSG00000280128	508.947	1.4508	0.113065	12.8315	1.09205e-37	2.88435e-36	NA		351	ENSG00000180730	1543.04	-1.64718	0.0893651	-18.432	7.27433e-76	8.37257e-74	SHISA2
		352	ENSG00000235448	54.3465	1.44839	0.32404	4.46978	7.83019e-06	2.34756e-05	LURAP1L-AS1		352	ENSG00000000003	1154.49	-1.65956	0.0729069	-22.7627	1.07478e-114	4.11236e-112	TSPAN6
		353	ENSG00000183889	25.971	1.44676	0.473813	3.05344	0.00226235	0.00473579	NPIPA9		353	ENSG00000104419	2704.92	-1.66169	0.353493	-4.70078	2.59174e-06	8.21753e-06	NDRG1
		354	ENSG00000183889	25.971	1.44676	0.473813	3.05344	0.00226235	0.00473579	NPIPA9		354	ENSG00000151090	567.975	-1.66616	0.117485	-14.1819	1.18562e-45	4.45222e-44	THRB
		355	ENSG00000197279	75.0357	1.44642	0.255762	5.65535	1.55526e-08	6.25952e-08	ZNF165		355	ENSG00000102312	1191.64	-1.67604	0.0808293	-20.7356	1.65505e-95	3.16629e-93	PORCN
		356	ENSG00000277215	46.1814	1.44594	0.361703	3.9976	6.3988e-05	0.00016926	SPANXA2-OT1		356	ENSG00000169372	486.788	-1.67724	0.119733	-14.0081	1.39006e-44	5.04591e-43	CRADD
		357	ENSG00000109321	767.368	1.44504	0.0908281	15.9096	5.43621e-57	3.15099e-55	AREG		357	ENSG00000184613	265.474	-1.68598	0.129538	-13.0154	1.00029e-38	2.78213e-37	NELL2
		358	ENSG00000196312	1519.42	1.44107	0.071447	20.1698	1.80473e-90	3.31812e-88	MFSD14CP		358	ENSG00000258947	533.683	-1.69125	0.117267	-14.4223	3.74887e-47	1.50775e-45	TUBB3
		359	ENSG00000216895	102.963	1.43845	0.207147	6.9441	3.80871e-12	2.1005e-11	RBM33-DT		359	ENSG00000147394	10884	-1.70002	0.0749118	-22.6936	5.18336e-114	1.88156e-111	ZNF185
		360	ENSG00000196646	222.979	1.43815	0.15179	9.47456	2.67885e-21	2.81757e-20	ZNF136		360	ENSG00000117152	63.3393	-1.70509	0.251546	-6.77846	1.21463e-11	6.42824e-11	RGS4
		361	ENSG00000276291	230.682	1.43284	0.153579	9.32965	1.06219e-20	1.07334e-19	FRG1HP		361	ENSG00000084636	212.324	-1.7107	0.182862	-9.35511	8.3513e-21	8.47522e-20	COL16A1
		362	ENSG00000164362	209.922	1.43249	0.17939	7.98532	1.40159e-15	1.01964e-14	TERT		362	ENSG00000138944	48.8017	-1.7146	0.420624	-4.07633	4.57528e-05	0.000123611	SHISAL1
		363	ENSG00000130517	1462.31	1.43183	0.0957043	14.961	1.32026e-50	5.89621e-49	PGPEP1		363	ENSG00000175315	129.05	-1.72673	0.199722	-8.64569	5.34807e-18	4.58586e-17	CST6
		364	ENSG00000171462	378.065	1.43069	0.131745	10.8596	1.79621e-27	2.75206e-26	DLK2		364	ENSG00000196814	273.256	-1.73216	0.219064	-7.90711	2.6343e-15	1.86376e-14	MVB12B
		365	ENSG00000083290	440.527	1.42957	0.189211	7.55544	4.17433e-14	2.69598e-13	ULK2		365	ENSG00000250644	103.397	-1.73276	0.253677	-6.83057	8.45753e-12	4.53707e-11	NA
		366	ENSG00000143355	60.5931	1.42853	0.269785	5.29506	1.18974e-07	4.3794e-07	LHX9		366	ENSG00000177854	136.443	-1.74545	0.190619	-9.15678	5.34669e-20	5.20943e-19	TMEM187
		367	ENSG00000099889	159.518	1.42656	0.217915	6.54641	5.89383e-11	2.94942e-10	ARVCF		367	ENSG00000155066	64.7003	-1.74853	0.295176	-5.92367	3.14831e-09	1.35679e-08	PROM2
		368	ENSG00000109255	405.186	1.4258	0.139941	10.1886	2.22919e-24	2.83291e-23	NMU		368	ENSG00000169855	3436.19	-1.75699	0.0700744	-25.0732	9.75629e-139	1.06246e-135	ROBO1
		369	ENSG00000203721	53.4504	1.42552	0.326686	4.36358	1.27952e-05	3.71724e-05	LINC00862		369	ENSG00000105855	64.9538	-1.76114	0.362705	-4.85557	1.20041e-06	3.94571e-06	ITGB8
		370	ENSG00000152433	142.523	1.42523	0.207926	6.85454	7.1543e-12	3.8643e-11	ZNF547		370	ENSG00000165215	93.2955	-1.76524	0.235012	-7.51129	5.85471e-14	3.72518e-13	CLDN3
		371	ENSG00000278129	345.243	1.42288	0.11892	11.965	5.42097e-33	1.13026e-31	ZNF8		371	ENSG00000149403	416.371	-1.76652	0.150581	-11.7314	8.8018e-32	1.71635e-30	GRIK4
		372	ENSG00000178229	254.394	1.42284	0.186593	7.62536	2.43354e-14	1.59868e-13	ZNF543		372	ENSG00000172260	679.586	-1.771	0.114619	-15.4511	7.41628e-54	3.76145e-52	NEGR1
		373	ENSG00000186642	372.107	1.42189	0.126809	11.2129	3.52504e-29	5.95512e-28	PDE2A		373	ENSG00000108932	157.498	-1.77406	0.212834	-8.33543	7.72175e-17	6.12762e-16	SLC16A6
		374	ENSG00000074966	69.3901	1.42084	0.290177	4.89647	9.75723e-07	3.23497e-06	TXK		374	ENSG00000084207	3696.31	-1.78634	0.077684	-22.995	5.23264e-117	2.17878e-114	GSTP1
		375	ENSG00000263002	458.526	1.42022	0.10228	13.8856	7.74848e-44	2.72874e-42	ZNF234		375	ENSG00000145908	283.683	-1.78787	0.151603	-11.7931	4.23538e-32	8.45701e-31	ZNF300
		376	ENSG00000228063	20.6307	1.41968	0.464325	3.05752	0.00223178	0.00467663	LYPLAL1-DT		376	ENSG00000125618	151.626	-1.80723	0.198299	-9.11369	7.96263e-20	7.6685e-19	PAX8
		377	ENSG00000175787	81.8633	1.41723	0.234378	6.04677	1.47778e-09	6.57065e-09	ZNF169		377	ENSG00000198624	1276.37	-1.80883	0.0913057	-19.8107	2.40667e-87	3.91624e-85	CCDC69
		378	ENSG00000188290	449.69	1.4155	0.123969	11.4182	3.39143e-30	6.01404e-29	HES4		378	ENSG00000198246	359.06	-1.81533	0.145338	-12.4905	8.41752e-36	2.02321e-34	SLC29A3
		379	ENSG00000128335	1214.42	1.41403	0.11578	12.2131	2.6469e-34	5.93853e-33	APOL2		379	ENSG00000277945	95.2685	-1.8194	0.227234	-8.00671	1.17817e-15	8.61984e-15	NA
		380	ENSG00000204248	21.6597	1.41393	0.424274	3.33258	0.000860445	0.00193785	COL11A2		380	ENSG00000123358	110.458	-1.8236	0.244131	-7.46974	8.03529e-14	5.06481e-13	NR4A1
		381	ENSG00000267283	43.4164	1.41237	0.376694	3.74937	0.000177282	0.000442097	NA		381	ENSG00000143194	35.1036	-1.82682	0.335141	-5.45088	5.01198e-08	1.91769e-07	MAEL
		382	ENSG00000196296	49.4389	1.41198	0.296037	4.7696	1.84592e-06	5.92981e-06	ATP2A1		382	ENSG00000142765	150.568	-1.84441	0.190957	-9.65877	4.5125e-22	4.98311e-21	SYTL1
		383	ENSG00000086300	301.706	1.40839	0.141524	9.95162	2.48115e-23	2.96669e-22	SNX10		383	ENSG00000168386	162.588	-1.85892	0.190354	-9.76559	1.58184e-22	1.7944e-21	FILIP1L
		384	ENSG00000157693	529.265	1.40702	0.110066	12.7834	2.03049e-37	5.30362e-36	TMEM268		384	ENSG00000232774	282.725	-1.86213	0.162052	-11.4909	1.46532e-30	2.67326e-29	LINC03033
		385	ENSG00000124635	50.1659	1.40669	0.283428	4.96313	6.93646e-07	2.34534e-06	H2BC11		385	ENSG00000111319	127.35	-1.87167	0.225157	-8.31275	9.35132e-17	7.3753e-16	SCNN1A
		386	ENSG00000163040	62.6423	1.40566	0.277234	5.07032	3.97155e-07	1.38281e-06	CCDC74A		386	ENSG00000276116	33.2126	-1.87197	0.441313	-4.24181	2.21728e-05	6.24303e-05	FUT8-AS1
		387	ENSG00000269837	197.374	1.40561	0.168071	8.36315	6.10646e-17	4.88966e-16	IPO5P1		387	ENSG00000058335	398.479	-1.8819	0.123103	-15.2871	9.31641e-53	4.48613e-51	RASGRF1
		388	ENSG00000166682	34.3989	1.40438	0.381058	3.68548	0.000228272	0.000558721	TMPRSS5		388	ENSG00000101188	52.5121	-1.88988	0.308122	-6.13354	8.59439e-10	3.90597e-09	NTSR1
		389	ENSG00000242779	1251.79	1.40433	0.0935417	15.0129	6.04598e-51	2.74336e-49	ZNF702P		389	ENSG00000147255	63.62	-1.90272	0.269271	-7.06618	1.59255e-12	9.11673e-12	IGSF1
		390	ENSG00000135604	144.726	1.40047	0.208809	6.70695	1.98733e-11	1.03398e-10	STX11		390	ENSG00000187601	62.1129	-1.90344	0.256238	-7.42841	1.09911e-13	6.85772e-13	MAGEH1
		391	ENSG00000116396	182.718	1.39915	0.166343	8.41123	4.05736e-17	3.28605e-16	KCNC4		391	ENSG00000163131	224.163	-1.90526	0.166652	-11.4326	2.87483e-30	5.13229e-29	CTSS
		392	ENSG00000263874	29.8624	1.39424	0.39658	3.51566	0.000438659	0.00103261	LINC00672		392	ENSG00000154493	57.3226	-1.91054	0.290169	-6.58422	4.57269e-11	2.31529e-10	C10orf90
		393	ENSG00000074935	646.824	1.39086	0.10018	13.8836	7.96682e-44	2.79867e-42	TUBE1		393	ENSG00000261371	80.2566	-1.91362	0.359356	-5.32514	1.00876e-07	3.7385e-07	PECAM1
		394	ENSG00000112319	601.74	1.38971	0.113975	12.1932	3.38091e-34	7.54945e-33	EYA4		394	ENSG00000215386	40.8197	-1.91865	0.345963	-5.54581	2.9259e-08	1.1487e-07	MIR99AHG
		395	ENSG00000231466	39.35	1.38781	0.325909	4.25829	2.05997e-05	5.81979e-05	NA		395	ENSG00000127124	2322.29	-1.92273	0.0818348	-23.4953	4.55664e-122	2.3892e-119	HIVEP3
		396	ENSG00000180787	91.2418	1.38733	0.232439	5.96858	2.39323e-09	1.04217e-08	ZFP3		396	ENSG00000204257	199.043	-1.92655	0.213832	-9.00964	2.06729e-19	1.93179e-18	HLA-DMA
		397	ENSG00000124171	480.786	1.38726	0.181803	7.63055	2.33756e-14	1.53777e-13	PARD6B		397	ENSG00000185532	177.799	-1.92906	0.172437	-11.1871	4.71839e-29	7.92387e-28	PRKG1
		398	ENSG00000274422	82.8335	1.38598	0.236608	5.85773	4.69243e-09	1.99014e-08	NA		398	ENSG00000196420	63.0349	-1.9334	0.250051	-7.732	1.05867e-14	7.15398e-14	S100A5
		399	ENSG00000170961	1080.89	1.38591	0.10014	13.8397	1.46898e-43	5.07228e-42	HAS2		399	ENSG00000242574	52.1449	-1.94563	0.392646	-4.95516	7.22692e-07	2.43773e-06	HLA-DMB
		400	ENSG00000177932	387.351	1.38581	0.155451	8.91475	4.88931e-19	4.46568e-18	ZNF354C		400	ENSG00000041982	4322.38	-1.95063	0.0882898	-22.0935	3.64791e-108	1.03287e-105	TNC
		401	ENSG00000159212	643.998	1.38275	0.133972	10.3212	5.65099e-25	7.44889e-24	CLIC6		401	ENSG00000143195	1244.66	-1.96313	0.088825	-22.1011	3.08767e-108	8.92083e-106	ILDR2
		402	ENSG00000162994	193.436	1.37996	0.168995	8.16564	3.19725e-16	2.4296e-15	CLHC1		402	ENSG00000219607	49.6166	-1.9804	0.349094	-5.67298	1.40332e-08	5.67138e-08	PPP1R3G
		403	ENSG00000269001	239.648	1.37868	0.175061	7.8754	3.39648e-15	2.38275e-14	ZNF818P		403	ENSG00000182578	69.496	-1.9907	0.363689	-5.47364	4.40883e-08	1.69424e-07	CSF1R
		404	ENSG00000197937	1597.97	1.37815	0.0685746	20.0971	7.82222e-90	1.36715e-87	ZNF347		404	ENSG00000089723	1037.31	-1.99135	0.138705	-14.3567	9.66962e-47	3.79204e-45	OTUB2
		405	ENSG00000132561	1013.96	1.37808	0.0895624	15.3868	2.00641e-53	9.86275e-52	MATN2		405	ENSG00000183570	231.187	-2.00923	0.220988	-9.09201	9.7223e-20	9.30619e-19	PCBP3
		406	ENSG00000187624	48.0971	1.37739	0.301674	4.56583	4.97528e-06	1.52358e-05	C17orf97		406	ENSG00000272620	2192.79	-2.01051	0.201065	-9.99932	1.53444e-23	1.85985e-22	AFAP1-AS1
		407	ENSG00000181315	475.989	1.3773	0.105186	13.094	3.56328e-39	1.01704e-37	ZNF322		407	ENSG00000189369	233.286	-2.03001	0.151693	-13.3824	7.66125e-41	2.35783e-39	GSPT2
		408	ENSG00000135750	310.486	1.3759	0.147987	9.29749	1.43801e-20	1.43872e-19	KCNK1		408	ENSG00000134339	136.318	-2.03652	0.207768	-9.80186	1.1053e-22	1.26908e-21	SAA2
		409	ENSG00000080224	59.7171	1.37515	0.268654	5.11868	3.07686e-07	1.08599e-06	EPHA6		409	ENSG00000158292	1071.06	-2.04825	0.140282	-14.6009	2.77026e-48	1.15349e-46	GPR153
		410	ENSG00000242622	56.6217	1.37408	0.277218	4.95668	7.17074e-07	2.41993e-06	GSK3B-DT		410	ENSG00000171388	168.708	-2.07369	0.18793	-11.0344	2.60814e-28	4.19584e-27	APLN
		411	ENSG00000070669	192.441	1.37364	0.162386	8.45912	2.69408e-17	2.2059e-16	ASNS		411	ENSG00000125637	674.904	-2.09024	0.106382	-19.6485	5.959e-86	9.16974e-84	PSD4
		412	ENSG00000171658	43.1942	1.37237	0.443799	3.09232	0.00198599	0.0042039	NMRAL2P		412	ENSG00000185885	162.655	-2.10024	0.263811	-7.96118	1.70408e-15	1.22897e-14	IFITM1
		413	ENSG00000129646	258.841	1.37228	0.1509	9.09402	9.54418e-20	9.15426e-19	QRICH2		413	ENSG00000123689	3462.6	-2.10055	0.0904726	-23.2175	3.02829e-119	1.38295e-116	G0S2
		414	ENSG00000188171	266.365	1.37213	0.140625	9.75734	1.71591e-22	1.94337e-21	ZNF626		414	ENSG00000100473	381.654	-2.10985	0.136174	-15.4938	3.82076e-54	1.96693e-52	COCH
		415	ENSG00000133619	244.559	1.37129	0.15834	8.66039	4.70145e-18	4.04365e-17	KRBA1		415	ENSG00000005379	88.0549	-2.12565	0.302501	-7.02691	2.11158e-12	1.19288e-11	TSPOAP1
		416	ENSG00000212719	2967.43	1.36872	0.0621536	22.0216	1.78686e-107	4.77295e-105	LINC02693		416	ENSG00000180353	457.833	-2.12694	0.15202	-13.9912	1.76332e-44	6.3682e-43	HCLS1
		417	ENSG00000228340	338.098	1.36574	0.12742	10.7185	8.33538e-27	1.23306e-25	MIR646HG		417	ENSG00000138131	786.155	-2.13231	0.404495	-5.27154	1.35283e-07	4.94373e-07	LOXL4
		418	ENSG00000144893	219.092	1.36557	0.177661	7.68638	1.51353e-14	1.01166e-13	MED12L		418	ENSG00000166920	410.586	-2.14523	0.174903	-12.2653	1.39163e-34	3.19308e-33	C15orf48
		419	ENSG00000023839	142.592	1.36518	0.200649	6.8038	1.01897e-11	5.42521e-11	ABCC2		419	ENSG00000019582	3556.82	-2.14615	0.0990532	-21.6667	4.2336e-104	1.05149e-101	CD74
		420	ENSG00000133321	153.826	1.36187	0.240019	5.674	1.39498e-08	5.64087e-08	PLAAT4		420	ENSG00000101938	904.869	-2.1777	0.0889899	-24.4714	2.98183e-132	2.63836e-129	CHRDL1
		421	ENSG00000226652	53.0958	1.36041	0.301859	4.50678	6.58196e-06	1.98637e-05	PSMD10P2		421	ENSG00000143847	95.1554	-2.20728	0.558554	-3.95178	7.75729e-05	0.000202882	PPFIA4
		422	ENSG00000079263	349.268	1.36018	0.146098	9.31007	1.27745e-20	1.28352e-19	SP140		422	ENSG00000168032	78.8854	-2.20923	0.256609	-8.60932	7.34962e-18	6.23419e-17	ENTPD3
		423	ENSG00000253958	366.302	1.35805	0.119168	11.396	4.37664e-30	7.71607e-29	CLDN23		423	ENSG00000125538	322.062	-2.21332	0.234695	-9.43061	4.07716e-21	4.23481e-20	IL1B
		424	ENSG00000005238	1098.84	1.35585	0.0860927	15.7488	7.00255e-56	3.8574e-54	ATOSB		424	ENSG00000173432	715.527	-2.21804	0.11642	-19.0521	6.31402e-81	8.43278e-79	SAA1
		425	ENSG00000168502	7346.95	1.35467	0.0574319	23.5875	5.18226e-123	2.93461e-120	MTCL1		425	ENSG00000164197	140.57	-2.23072	0.194087	-11.4934	1.4238e-30	2.60086e-29	RNF180
		426	ENSG00000167766	873.016	1.35333	0.11044	12.254	1.59997e-34	3.64746e-33	ZNF83		426	ENSG00000135439	227.959	-2.25504	0.358971	-6.28194	3.34376e-10	1.5732e-09	AGAP2
		427	ENSG00000163328	92.731	1.35123	0.237187	5.69689	1.22016e-08	4.96231e-08	GPR155		427	ENSG00000147689	113.07	-2.26461	0.236378	-9.58045	9.6626e-22	1.04983e-20	FAM83A
		428	ENSG00000257913	35.4098	1.34895	0.373431	3.61231	0.000303483	0.000728699	DDN-AS1		428	ENSG00000124225	3613.81	-2.27072	0.41333	-5.49372	3.9355e-08	1.51936e-07	PMEPA1
		429	ENSG00000187244	1192.04	1.34823	0.111545	12.0869	1.23939e-33	2.69939e-32	BCAM		429	ENSG00000162407	1628.3	-2.30329	0.0958552	-24.0288	1.38938e-127	9.36642e-125	PLPP3
		430	ENSG00000213799	451.626	1.34665	0.122053	11.0333	2.63993e-28	4.24217e-27	ZNF845		430	ENSG00000221866	127.545	-2.30698	0.230399	-10.013	1.33678e-23	1.62445e-22	PLXNA4
		431	ENSG00000133624	338.083	1.34618	0.125694	10.71	9.13903e-27	1.34913e-25	ZNF767P		431	ENSG00000163701	391.225	-2.32103	0.129512	-17.9213	8.03863e-72	8.18726e-70	IL17RE
		432	ENSG00000163803	130.874	1.3457	0.225173	5.97631	2.28244e-09	9.96993e-09	PLB1		432	ENSG00000168874	654.019	-2.33582	0.0966088	-24.1781	3.77876e-129	2.81558e-126	ATOH8
		433	ENSG00000184979	89.5348	1.345	0.240003	5.60412	2.09318e-08	8.31926e-08	USP18		433	ENSG00000120594	712.461	-2.33873	0.106172	-22.0277	1.56207e-107	4.25275e-105	PLXDC2
		434	ENSG00000170949	824.118	1.34456	0.111534	12.0551	1.82233e-33	3.92077e-32	ZNF160		434	ENSG00000101842	51.1252	-2.34184	0.377319	-6.20654	5.41647e-10	2.50428e-09	VSIG1
		435	ENSG00000162105	1180.78	1.34443	0.101918	13.1912	9.85667e-40	2.88308e-38	SHANK2		435	ENSG00000167772	695.861	-2.35583	0.125538	-18.7659	1.4356e-78	1.78279e-76	ANGPTL4
		436	ENSG00000225032	114.166	1.34425	0.216387	6.21228	5.22229e-10	2.41766e-09	NA		436	ENSG00000120899	111.517	-2.36218	0.218845	-10.7939	3.67978e-27	5.5538e-26	PTK2B
		437	ENSG00000135299	355.169	1.34261	0.11981	11.2061	3.8058e-29	6.41414e-28	ANKRD6		437	ENSG00000204287	167.838	-2.3799	0.182838	-13.0165	9.86038e-39	2.75332e-37	HLA-DRA
		438	ENSG00000242615	58.203	1.34228	0.280199	4.79046	1.66397e-06	5.36845e-06	NA		438	ENSG00000224184	208.309	-2.40621	0.380172	-6.32926	2.46342e-10	1.17423e-09	MIR3681HG
		439	ENSG00000276386	45.3397	1.34014	0.330626	4.05335	5.04895e-05	0.000135555	CNTNAP3P2		439	ENSG00000179583	391.642	-2.41522	0.300482	-8.0378	9.14621e-16	6.7439e-15	CIITA
		440	ENSG00000148677	34267	1.33974	0.263663	5.08127	3.74911e-07	1.31085e-06	ANKRD1		440	ENSG00000173546	1924.71	-2.44762	0.182912	-13.3814	7.76515e-41	2.38462e-39	CSPG4
		441	ENSG00000180596	46.6768	1.33953	0.313419	4.27393	1.92058e-05	5.46064e-05	H2BC4		441	ENSG00000066629	138.584	-2.454	0.280524	-8.74791	2.17337e-18	1.90516e-17	EML1
		442	ENSG00000146267	133.876	1.33849	0.195761	6.83737	8.06575e-12	4.33347e-11	FAXC		442	ENSG00000277734	46.0628	-2.49908	0.396428	-6.30399	2.90088e-10	1.37167e-09	TRAC
		443	ENSG00000105419	44.5243	1.33845	0.342099	3.91246	9.1362e-05	0.000237106	MEIS3		443	ENSG00000135373	1937.85	-2.50322	0.117417	-21.3189	7.57475e-101	1.70215e-98	EHF
		444	ENSG00000131669	689.809	1.3375	0.11983	11.1616	6.28309e-29	1.03792e-27	NINJ1		444	ENSG00000168528	4995.18	-2.50487	0.0860079	-29.1237	1.7992e-186	5.09424e-183	SERINC2
		445	ENSG00000130783	42.9824	1.3357	0.384981	3.46952	0.00052138	0.00121621	CCDC62		445	ENSG00000134247	1011.31	-2.51396	0.0900922	-27.9043	2.36545e-171	3.04433e-168	PTGFRN
		446	ENSG00000075618	2705.07	1.33478	0.0988147	13.5079	1.40403e-41	4.48687e-40	FSCN1		446	ENSG00000205362	34.1491	-2.53587	0.369214	-6.86828	6.49788e-12	3.52319e-11	MT1A
		447	ENSG00000163001	762.413	1.32965	0.0966102	13.763	4.25462e-43	1.4479e-41	CFAP36		447	ENSG00000255346	352.991	-2.55434	0.35737	-7.14761	8.82995e-13	5.15062e-12	NOX5
		448	ENSG00000180921	295.546	1.32874	0.138199	9.61469	6.93186e-22	7.5838e-21	FAM83H		448	ENSG00000138623	6900.99	-2.59331	0.162889	-15.9207	4.55218e-57	2.65207e-55	SEMA7A
		449	ENSG00000160326	1428.23	1.32843	0.0843202	15.7545	6.39283e-56	3.53528e-54	SLC2A6		449	ENSG00000102359	215.083	-2.59469	0.214927	-12.0724	1.4773e-33	3.19788e-32	SRPX2
		450	ENSG00000188283	334.222	1.32736	0.146798	9.04209	1.53706e-19	1.45748e-18	ZNF383		450	ENSG00000106852	180.095	-2.59603	0.203681	-12.7456	3.29947e-37	8.52383e-36	LHX6
		451	ENSG00000245275	28.3696	1.32704	0.386258	3.43565	0.000591145	0.00136813	SAP30L-AS1		451	ENSG00000196611	2691.79	-2.61427	0.396896	-6.58677	4.49494e-11	2.28e-10	MMP1
		452	ENSG00000244300	289.212	1.32648	0.126991	10.4455	1.53622e-25	2.08517e-24	GATA2-AS1		452	ENSG00000152377	171.475	-2.64623	0.199392	-13.2715	3.38916e-40	1.01438e-38	SPOCK1
		453	ENSG00000182648	356.193	1.32586	0.129531	10.2359	1.36899e-24	1.77805e-23	RNF32-DT		453	ENSG00000131746	331.077	-2.66785	0.362937	-7.35074	1.97108e-13	1.20799e-12	TNS4
		454	ENSG00000141524	2702.56	1.3258	0.0759502	17.4562	3.09037e-68	2.71742e-66	TMC6		454	ENSG00000205336	3801.61	-2.67168	0.180375	-14.8118	1.22832e-49	5.36707e-48	ADGRG1
		455	ENSG00000167637	344.373	1.32352	0.141095	9.3803	6.57869e-21	6.74399e-20	ZNF283		455	ENSG00000231290	237.942	-2.6984	0.154643	-17.4493	3.48762e-68	3.04779e-66	APCDD1L-DT
		456	ENSG00000142675	84.0133	1.32322	0.239132	5.53343	3.14021e-08	1.22671e-07	CNKSR1		456	ENSG00000198910	3516.88	-2.70471	0.258282	-10.4719	1.16275e-25	1.58737e-24	L1CAM
		457	ENSG00000170577	239.921	1.32301	0.152568	8.67161	4.26069e-18	3.66901e-17	SIX2		457	ENSG00000171951	96.3069	-2.71975	0.251735	-10.804	3.29505e-27	4.9891e-26	SCG2
		458	ENSG00000234327	96.1919	1.32279	0.258	5.12708	2.94268e-07	1.04175e-06	ZNF232-AS1		458	ENSG00000131095	78.3395	-2.75956	0.296444	-9.30887	1.29205e-20	1.29727e-19	GFAP
		459	ENSG00000135838	71.8709	1.3217	0.301806	4.37931	1.19055e-05	3.47804e-05	NPL		459	ENSG00000159167	2126.12	-2.76241	0.118527	-23.3063	3.82919e-120	1.93607e-117	STC1
		460	ENSG00000198156	24.5126	1.32066	0.441237	2.99308	0.00276173	0.00567623	NPIPB6		460	ENSG00000108602	254.742	-2.79169	0.180514	-15.4652	5.96026e-54	3.04619e-52	ALDH3A1
		461	ENSG00000115902	877.633	1.32061	0.129494	10.1983	2.01788e-24	2.58292e-23	SLC1A4		461	ENSG00000241749	81.933	-2.81286	0.287959	-9.76826	1.54069e-22	1.75194e-21	RPSAP52
		462	ENSG00000244573	23.469	1.31849	0.431861	3.05304	0.00226533	0.00474132	RPL30P11		462	ENSG00000187908	499.513	-2.91159	0.387023	-7.52304	5.35172e-14	3.42051e-13	DMBT1
		463	ENSG00000166073	681.027	1.31605	0.243089	5.41385	6.16838e-08	2.33179e-07	GPR176		463	ENSG00000140459	71.27	-3.02048	0.295654	-10.2163	1.67641e-24	2.16938e-23	CYP11A1
		464	ENSG00000165655	378.139	1.31551	0.123463	10.6551	1.65113e-26	2.38764e-25	ZNF503		464	ENSG00000198768	1357.31	-3.12683	0.0918257	-34.0518	3.82323e-254	2.70627e-250	APCDD1L
		465	ENSG00000226287	32.2913	1.31449	0.391876	3.35436	0.000795499	0.00180408	TMEM191A		465	ENSG00000169083	478.119	-3.15542	0.295428	-10.6809	1.25115e-26	1.82604e-25	AR
		466	ENSG00000197355	1747.84	1.31156	0.0842321	15.5708	1.15033e-54	6.07656e-53	UAP1L1		466	ENSG00000196154	6198.64	-3.18366	0.386504	-8.23707	1.76485e-16	1.36307e-15	S100A4
		467	ENSG00000277631	69.9862	1.31112	0.282243	4.64536	3.39486e-06	1.05955e-05	PGM5P3-AS1		467	ENSG00000128422	97.8183	-3.23848	0.273826	-11.8268	2.83842e-32	5.70789e-31	KRT17
		468	ENSG00000183647	485.025	1.31092	0.106258	12.3371	5.71559e-35	1.32431e-33	ZNF530		468	ENSG00000166145	455.958	-3.27948	0.186805	-17.5556	5.38543e-69	4.95075e-67	SPINT1
		469	ENSG00000196867	551.561	1.30845	0.0955546	13.6932	1.11515e-42	3.69723e-41	ZFP28		469	ENSG00000185630	360.601	-3.34253	0.603069	-5.54253	2.98128e-08	1.16914e-07	PBX1
		470	ENSG00000277778	494.794	1.30818	0.151788	8.61844	6.78721e-18	5.77443e-17	PGM5P2		470	ENSG00000196126	110.092	-3.45693	0.270825	-12.7644	2.58985e-37	6.73979e-36	HLA-DRB1
		471	ENSG00000114626	700.068	1.3075	0.138151	9.46427	2.95631e-21	3.09789e-20	ABTB1		471	ENSG00000028137	260.314	-3.51538	0.193842	-18.1353	1.67663e-73	1.82585e-71	TNFRSF1B
		472	ENSG00000125872	48.9235	1.30708	0.363253	3.59826	0.000320354	0.000766478	LRRN4		472	ENSG00000253746	62.282	-3.57387	0.340894	-10.4838	1.02503e-25	1.40342e-24	NA
		473	ENSG00000166664	61.2484	1.30192	0.29216	4.45621	8.34227e-06	2.49054e-05	CHRFAM7A		473	ENSG00000165949	273.449	-3.73866	0.17816	-20.9848	9.0254e-98	1.87901e-95	IFI27
		474	ENSG00000099998	1563.94	1.30078	0.114708	11.34	8.31899e-30	1.45218e-28	GGT5		474	ENSG00000197249	293.113	-4.02158	0.200417	-20.066	1.46226e-89	2.52455e-87	SERPINA1
		475	ENSG00000214407	46.7203	1.30066	0.351716	3.69804	0.000217268	0.000533767	RDUR		475	ENSG00000253161	173.406	-4.05471	0.245351	-16.5262	2.37843e-61	1.6669e-59	LINC01605
		476	ENSG00000115339	3051.28	1.3005	0.0812487	16.0064	1.15325e-57	6.91801e-56	GALNT3		476	ENSG00000079308	726.692	-4.4602	0.144945	-30.7717	6.26482e-208	2.95637e-204	TNS1
		477	ENSG00000128408	134.836	1.30035	0.205568	6.32564	2.52182e-10	1.20126e-09	RIBC2		477	ENSG00000213626	221.651	-4.6366	0.218905	-21.1809	1.43308e-99	3.07397e-97	LBH
		478	ENSG00000184271	83.2802	1.30003	0.28448	4.56984	4.88089e-06	1.49565e-05	POU6F1
		479	ENSG00000179348	1058.03	1.29909	0.132539	9.80154	1.10885e-22	1.27212e-21	GATA2
		480	ENSG00000186272	225.635	1.2957	0.17208	7.52965	5.08783e-14	3.2592e-13	ZNF17
		481	ENSG00000131459	2471.12	1.29379	0.177765	7.27807	3.38619e-13	2.04341e-12	GFPT2
		482	ENSG00000270574	28.0777	1.29269	0.368485	3.50811	0.000451309	0.00106062	NA
		483	ENSG00000233493	243.968	1.29102	0.220298	5.86032	4.61973e-09	1.96283e-08	TMEM238
		484	ENSG00000112294	482.803	1.29061	0.110631	11.6659	1.90321e-31	3.62634e-30	ALDH5A1
		485	ENSG00000224063	54.4081	1.28762	0.286739	4.49056	7.10377e-06	2.1402e-05	CALCRL-AS1
		486	ENSG00000166313	760.173	1.2867	0.114582	11.2296	2.91834e-29	4.95978e-28	APBB1
		487	ENSG00000249471	441.867	1.28504	0.115477	11.1282	9.14998e-29	1.4958e-27	ZNF324B
		488	ENSG00000156265	101.267	1.28462	0.253343	5.07067	3.96407e-07	1.38055e-06	MAP3K7CL
		489	ENSG00000103528	84.3593	1.28302	0.241378	5.3154	1.06424e-07	3.93481e-07	SYT17
		490	ENSG00000173480	491.452	1.28261	0.105927	12.1084	9.52997e-34	2.08203e-32	ZNF417
		491	ENSG00000168685	1727.11	1.28241	0.224455	5.71344	1.10717e-08	4.51835e-08	IL7R
		492	ENSG00000130844	816.617	1.28105	0.0834062	15.3592	3.07524e-53	1.49609e-51	ZNF331
		493	ENSG00000171291	355.936	1.27952	0.12984	9.85457	6.54959e-23	7.60021e-22	ZNF439
		494	ENSG00000133401	590.12	1.27855	0.101227	12.6305	1.43353e-36	3.57927e-35	PDZD2
		495	ENSG00000107201	235.983	1.27718	0.207826	6.14544	7.97442e-10	3.63353e-09	RIGI
		496	ENSG00000079435	207.486	1.27699	0.1667	7.66042	1.85324e-14	1.23291e-13	LIPE
		497	ENSG00000179240	189.03	1.27629	0.169599	7.52534	5.25834e-14	3.36386e-13	GVQW3
		498	ENSG00000167895	228.008	1.27622	0.156244	8.1681	3.13276e-16	2.38315e-15	TMC8
		499	ENSG00000144331	77.5705	1.27613	0.281226	4.53775	5.68579e-06	1.72956e-05	ZNF385B
		500	ENSG00000154153	231.708	1.27522	0.174499	7.30787	2.71408e-13	1.64695e-12	RETREG1
		501	ENSG00000265962	44.8422	1.27488	0.326325	3.90677	9.35377e-05	0.000242397	GACAT2
		502	ENSG00000196422	2065.75	1.27387	0.0596182	21.3671	2.70565e-101	6.17804e-99	PPP1R26
		503	ENSG00000287016	78.2604	1.27362	0.264527	4.81472	1.47408e-06	4.78856e-06	NA
		504	ENSG00000073331	184.537	1.27175	0.182136	6.98246	2.90064e-12	1.61926e-11	ALPK1
		505	ENSG00000152443	882.093	1.27111	0.0934984	13.595	4.28735e-42	1.37945e-40	ZNF776
		506	ENSG00000260160	45.4313	1.27103	0.298475	4.2584	2.05891e-05	5.81912e-05	NA
		507	ENSG00000163644	833.492	1.27067	0.106747	11.9036	1.13395e-32	2.32321e-31	PPM1K
		508	ENSG00000106714	321.741	1.26808	0.181722	6.97815	2.99096e-12	1.6677e-11	CNTNAP3
		509	ENSG00000182389	404.918	1.26799	0.160134	7.91833	2.40725e-15	1.70995e-14	CACNB4
		510	ENSG00000233327	42.3628	1.26788	0.399589	3.17296	0.00150892	0.00326532	USP32P2
		511	ENSG00000196787	51.1992	1.26635	0.316918	3.99582	6.44717e-05	0.000170475	H2AC11
		512	ENSG00000198538	541.862	1.26488	0.112018	11.2917	1.44202e-29	2.50179e-28	ZNF28
		513	ENSG00000177125	516.657	1.26475	0.128424	9.84823	6.97629e-23	8.0689e-22	ZBTB34
		514	ENSG00000121406	427.313	1.2637	0.112031	11.2799	1.64855e-29	2.83578e-28	ZNF549
		515	ENSG00000102934	150.184	1.26324	0.254707	4.9596	7.06373e-07	2.38552e-06	PLLP
		516	ENSG00000227598	35.679	1.25938	0.375412	3.35466	0.000794639	0.00180255	NA
		517	ENSG00000185818	308.683	1.25934	0.163499	7.70246	1.33473e-14	8.95536e-14	NAT8L
		518	ENSG00000173273	1657.82	1.25771	0.0623702	20.1653	1.97547e-90	3.58549e-88	TNKS
		519	ENSG00000158106	510.177	1.25689	0.128627	9.7716	1.49077e-22	1.69789e-21	RHPN1
		520	ENSG00000115267	430.55	1.25673	0.179949	6.98379	2.87318e-12	1.60456e-11	IFIH1
		521	ENSG00000171160	466.303	1.25575	0.106416	11.8005	3.88176e-32	7.77285e-31	MORN4
		522	ENSG00000132274	64.691	1.25411	0.289631	4.33002	1.49095e-05	4.29711e-05	TRIM22
		523	ENSG00000138769	99.6055	1.25375	0.209516	5.98405	2.17661e-09	9.53706e-09	CDKL2
		524	ENSG00000104626	2194.11	1.25336	0.084554	14.8232	1.03708e-49	4.5455e-48	ERI1
		525	ENSG00000153814	364.255	1.25308	0.123726	10.1279	4.15298e-24	5.1892e-23	JAZF1
		526	ENSG00000128645	161.161	1.25109	0.193358	6.47033	9.77872e-11	4.81019e-10	HOXD1
		527	ENSG00000232803	853.085	1.24916	0.296201	4.21726	2.47285e-05	6.92271e-05	SLCO4A1-AS1
		528	ENSG00000198482	245.086	1.2491	0.171059	7.30215	2.83212e-13	1.71784e-12	ZNF808
		529	ENSG00000130513	216.584	1.24728	0.172328	7.23783	4.55925e-13	2.72113e-12	GDF15
		530	ENSG00000232098	797.4	1.24716	0.0994758	12.5373	4.66349e-36	1.14026e-34	ZNF584-DT
		531	ENSG00000284968	94.6906	1.24682	0.212792	5.85931	4.64793e-09	1.97363e-08	NA
		532	ENSG00000121895	1191.33	1.24634	0.0892162	13.9699	2.37845e-44	8.54611e-43	TMEM156
		533	ENSG00000198133	107.695	1.24622	0.260143	4.79055	1.66328e-06	5.36745e-06	TMEM229B
		534	ENSG00000153896	37.095	1.24324	0.407527	3.05069	0.00228317	0.00477442	ZNF599
		535	ENSG00000245571	106.112	1.24289	0.208733	5.95446	2.60935e-09	1.13106e-08	FAM111A-DT
		536	ENSG00000184307	310.947	1.23874	0.129522	9.56394	1.1336e-21	1.22226e-20	ZDHHC23
		537	ENSG00000256034	35.6316	1.23854	0.382808	3.23539	0.00121475	0.00266871	NA
		538	ENSG00000119915	27.1367	1.23837	0.428811	2.88792	0.00387801	0.00776314	ELOVL3
		539	ENSG00000197016	573.772	1.23756	0.111151	11.1341	8.5614e-29	1.40771e-27	ZNF470
		540	ENSG00000106853	2743.72	1.23692	0.0632997	19.5407	4.95166e-85	7.45751e-83	PTGR1
		541	ENSG00000163347	362.823	1.2367	0.158625	7.79641	6.3691e-15	4.38557e-14	CLDN1
		542	ENSG00000171295	577.382	1.23354	0.109831	11.2312	2.86408e-29	4.87342e-28	ZNF440
		543	ENSG00000269825	1438.72	1.23073	0.0820339	15.0026	7.05596e-51	3.18125e-49	NA
		544	ENSG00000131018	2287.15	1.23064	0.0790831	15.5613	1.33366e-54	7.01884e-53	SYNE1
		545	ENSG00000262001	59.8429	1.22995	0.260527	4.721	2.34684e-06	7.46613e-06	DLGAP1-AS2
		546	ENSG00000137142	2425.79	1.22988	0.0761547	16.1498	1.13956e-58	7.33306e-57	IGFBPL1
		547	ENSG00000142046	32.8231	1.22842	0.374376	3.28124	0.00103351	0.00229873	TMEM91
		548	ENSG00000270012	39.4316	1.2277	0.344225	3.56655	0.000361717	0.000860354	NA
		549	ENSG00000144485	278.688	1.2261	0.136006	9.01505	1.96783e-19	1.84249e-18	HES6
		550	ENSG00000135636	1563.07	1.22581	0.0832248	14.7289	4.20316e-49	1.80316e-47	DYSF
		551	ENSG00000158186	224.59	1.22432	0.16443	7.44589	9.6295e-14	6.03742e-13	MRAS
		552	ENSG00000170412	416.845	1.22332	0.409984	2.98382	0.00284679	0.00583241	GPRC5C
		553	ENSG00000174136	6653.97	1.22165	0.199788	6.11476	9.6702e-10	4.37104e-09	RGMB
		554	ENSG00000248905	4211.66	1.22159	0.0669484	18.2467	2.19708e-74	2.46857e-72	FMN1
		555	ENSG00000142065	120.389	1.22073	0.225962	5.40238	6.5762e-08	2.47539e-07	ZFP14
		556	ENSG00000245694	647.878	1.21962	0.105104	11.6039	3.93552e-31	7.36e-30	CRNDE
		557	ENSG00000170801	140.728	1.21943	0.192307	6.34107	2.28178e-10	1.0928e-09	HTRA3
		558	ENSG00000117425	25.2347	1.21849	0.510017	2.38912	0.0168888	0.0296423	PTCH2
		559	ENSG00000235100	37.7551	1.21808	0.347523	3.50504	0.00045654	0.00107238	NA
		560	ENSG00000114315	661.006	1.21704	0.141111	8.62468	6.42742e-18	5.47882e-17	HES1
		561	ENSG00000103056	70.8604	1.21684	0.273615	4.44728	8.69652e-06	2.58757e-05	SMPD3
		562	ENSG00000254554	63.8343	1.21572	0.279222	4.35395	1.33706e-05	3.87647e-05	ADM-DT
		563	ENSG00000136869	1762.44	1.21525	0.0744476	16.3235	6.71553e-60	4.44261e-58	TLR4
		564	ENSG00000186300	200.499	1.21497	0.155568	7.80985	5.72571e-15	3.95409e-14	ZNF555
		565	ENSG00000268573	24.9941	1.21495	0.421852	2.88004	0.00397629	0.00794752	NA
		566	ENSG00000215302	95.4437	1.21467	0.20634	5.88675	3.93875e-09	1.68208e-08	WHAMMP4
		567	ENSG00000184486	104.078	1.21385	0.201471	6.02492	1.6919e-09	7.48746e-09	POU3F2
		568	ENSG00000222000	31.9018	1.21334	0.390909	3.10388	0.00191	0.00405578	NA
		569	ENSG00000165699	2150.15	1.2133	0.0727878	16.6691	2.20026e-62	1.58924e-60	TSC1
		570	ENSG00000186230	465.455	1.21169	0.103999	11.651	2.2679e-31	4.30384e-30	ZNF749
		571	ENSG00000280099	32.3497	1.21142	0.389907	3.10696	0.00189022	0.0040186	NA
		572	ENSG00000146858	401.116	1.21119	0.171848	7.04804	1.81453e-12	1.03166e-11	ZC3HAV1L
		573	ENSG00000180044	80.0941	1.20945	0.227877	5.30746	1.11161e-07	4.10461e-07	C3orf80
		574	ENSG00000204314	33.4043	1.20925	0.39871	3.0329	0.00242215	0.00503677	PRRT1
		575	ENSG00000204314	33.4043	1.20925	0.39871	3.0329	0.00242215	0.00503677	PRRT1
		576	ENSG00000269416	295.553	1.20793	0.160789	7.51248	5.8016e-14	3.69304e-13	LINC01224
		577	ENSG00000226332	217.54	1.20721	0.198209	6.09062	1.12476e-09	5.05983e-09	NA
		578	ENSG00000180914	139.569	1.20684	0.205505	5.87252	4.2921e-09	1.82692e-08	OXTR
		579	ENSG00000115310	23420.6	1.20368	0.0576657	20.8734	9.34481e-97	1.8633e-94	RTN4
		580	ENSG00000083844	719.751	1.20236	0.0947211	12.6937	6.40882e-37	1.63477e-35	ZNF264
		581	ENSG00000204789	53.553	1.20085	0.341932	3.51197	0.000444799	0.00104654	ZNF204P
		582	ENSG00000203727	334.73	1.20074	0.152022	7.89847	2.82349e-15	1.99362e-14	SAMD5
		583	ENSG00000286190	61.9166	1.20064	0.329622	3.64246	0.000270042	0.000654396	NA
		584	ENSG00000286190	61.9166	1.20064	0.329622	3.64246	0.000270042	0.000654396	NA
		585	ENSG00000106537	262.185	1.20013	0.143109	8.38613	5.02423e-17	4.04826e-16	TSPAN13
		586	ENSG00000173281	347.219	1.19759	0.123937	9.66291	4.33375e-22	4.79695e-21	PPP1R3B
		587	ENSG00000198496	226.84	1.19722	0.156002	7.67435	1.66253e-14	1.10812e-13	NBR2
		588	ENSG00000267216	47.437	1.19557	0.312164	3.82996	0.000128164	0.000326334	ZNF8-ERVK3-1
		589	ENSG00000251023	20.4657	1.19459	0.447919	2.66697	0.00765379	0.0144108	NA
		590	ENSG00000131127	783.585	1.19439	0.0845635	14.1241	2.6971e-45	9.9694e-44	ZNF141
		591	ENSG00000074181	88.8506	1.19377	0.248808	4.79797	1.60281e-06	5.18415e-06	NOTCH3
		592	ENSG00000204524	318.717	1.19166	0.139153	8.56366	1.09337e-17	9.18082e-17	ZNF805
		593	ENSG00000180257	191.136	1.19162	0.180738	6.59305	4.30875e-11	2.19105e-10	ZNF816
		594	ENSG00000101306	27.2656	1.19147	0.419157	2.84254	0.00447558	0.00883817	MYLK2
		595	ENSG00000131845	697.715	1.19145	0.106807	11.1552	6.75521e-29	1.11331e-27	ZNF304
		596	ENSG00000160190	424.864	1.18963	0.107273	11.0897	1.40708e-28	2.28703e-27	SLC37A1
		597	ENSG00000026103	131.239	1.18926	0.196867	6.04093	1.53233e-09	6.80677e-09	FAS
		598	ENSG00000160161	131.837	1.18915	0.211811	5.61419	1.97487e-08	7.86892e-08	CILP2
		599	ENSG00000282936	407.023	1.18879	0.115622	10.2817	8.52062e-25	1.11279e-23	NA
		600	ENSG00000225439	55.9092	1.18779	0.394516	3.01074	0.00260611	0.00538215	BOLA3-DT
		601	ENSG00000196421	94.7238	1.18775	0.217063	5.4719	4.45236e-08	1.71004e-07	C20orf204
		602	ENSG00000198346	274.008	1.18743	0.129061	9.20056	3.56081e-20	3.50316e-19	ZNF813
		603	ENSG00000251247	92.1037	1.18625	0.237431	4.99618	5.84785e-07	1.99537e-06	ZNF345
		604	ENSG00000197128	426.019	1.18609	0.129708	9.14432	6.00047e-20	5.8184e-19	ZNF772
		605	ENSG00000249087	53.7962	1.18563	0.298331	3.97421	7.06136e-05	0.000185779	ZNF436-AS1
		606	ENSG00000235437	542.795	1.18483	0.0932467	12.7064	5.45022e-37	1.3978e-35	LINC01278
		607	ENSG00000224843	44.2969	1.18212	0.325458	3.63218	0.00028104	0.00067861	LINC00240
		608	ENSG00000229619	65.3144	1.18201	0.26592	4.44499	8.78976e-06	2.61476e-05	MBNL1-AS1
		609	ENSG00000157657	1473.65	1.18177	0.0875373	13.5002	1.5595e-41	4.96132e-40	ZNF618
		610	ENSG00000186026	152.239	1.18165	0.183341	6.4451	1.15523e-10	5.64928e-10	ZNF284
		611	ENSG00000262691	25.6372	1.18157	0.387444	3.04965	0.00229106	0.0047888	NA
		612	ENSG00000167964	39.692	1.18136	0.439016	2.69093	0.00712524	0.0135181	RAB26
		613	ENSG00000166704	296.549	1.18103	0.143058	8.25563	1.511e-16	1.17534e-15	ZNF606
		614	ENSG00000171365	528.791	1.18046	0.110596	10.6736	1.3525e-26	1.96989e-25	CLCN5
		615	ENSG00000204758	81.037	1.18031	0.242027	4.87677	1.07838e-06	3.55864e-06	RPL26L1-AS1
		616	ENSG00000204519	424.328	1.18019	0.136685	8.63437	5.90529e-18	5.04838e-17	ZNF551
		617	ENSG00000151150	185.698	1.17916	0.181305	6.50375	7.83407e-11	3.89011e-10	ANK3
		618	ENSG00000165115	853.129	1.17887	0.0850467	13.8615	1.08378e-43	3.76979e-42	KIF27
		619	ENSG00000259495	118.812	1.17691	0.212939	5.52701	3.25738e-08	1.26968e-07	ARNT2-DT
		620	ENSG00000188352	156.986	1.17651	0.174512	6.74173	1.56516e-11	8.20664e-11	FOCAD
		621	ENSG00000257446	47.8683	1.17423	0.31175	3.76658	0.000165497	0.0004149	ZNF878
		622	ENSG00000129749	48.1956	1.17412	0.312457	3.75769	0.000171489	0.000428708	CHRNA10
		623	ENSG00000255150	21.0122	1.17129	0.425238	2.75444	0.00587931	0.0113289	EID3
		624	ENSG00000167232	624.632	1.1705	0.132479	8.83533	9.98056e-19	8.9314e-18	ZNF91
		625	ENSG00000197808	151.625	1.17031	0.178462	6.55777	5.46173e-11	2.74288e-10	ZNF461
		626	ENSG00000185499	51.4923	1.16924	0.331778	3.52417	0.00042481	0.00100201	MUC1
		627	ENSG00000163412	201.573	1.16847	0.155389	7.51964	5.49257e-14	3.50105e-13	EIF4E3
		628	ENSG00000277758	156.465	1.16825	0.211279	5.52943	3.21267e-08	1.25329e-07	SYT15B
		629	ENSG00000084710	146.387	1.16799	0.233331	5.00572	5.56531e-07	1.9054e-06	EFR3B
		630	ENSG00000181885	482.01	1.16543	0.155207	7.50886	5.96431e-14	3.7915e-13	CLDN7
		631	ENSG00000284948	46.4122	1.1653	0.325656	3.57831	0.000345829	0.00082367	NA
		632	ENSG00000198521	661.349	1.16463	0.101738	11.4474	2.42272e-30	4.35259e-29	ZNF43
		633	ENSG00000141448	928.031	1.16362	0.0957382	12.1542	5.4473e-34	1.20496e-32	GATA6
		634	ENSG00000256060	214.174	1.16181	0.171607	6.77017	1.28631e-11	6.79588e-11	TRAPPC2B
		635	ENSG00000261094	71.6443	1.16147	0.262122	4.43104	9.37804e-06	2.77287e-05	NA
		636	ENSG00000177374	227.737	1.16057	0.178658	6.49604	8.24599e-11	4.08891e-10	HIC1
		637	ENSG00000153294	28.3705	1.16026	0.4544	2.55339	0.0106681	0.01948	ADGRF4
		638	ENSG00000284879	66.0563	1.16015	0.253223	4.58153	4.61587e-06	1.41843e-05	NA
		639	ENSG00000136848	3442.87	1.16012	0.0551875	21.0215	4.17012e-98	8.8114e-96	DAB2IP
		640	ENSG00000285730	48.3465	1.16008	0.313636	3.69882	0.000216605	0.000532283	NA
		641	ENSG00000233822	29.0275	1.15994	0.440522	2.63311	0.0084608	0.0157729	H2BC15
		642	ENSG00000185561	244.671	1.15982	0.175033	6.6263	3.44211e-11	1.76111e-10	TLCD2
		643	ENSG00000272501	31.8877	1.15742	0.37274	3.10517	0.00190173	0.00404158	NA
		644	ENSG00000224934	61.9716	1.15736	0.263721	4.38856	1.14102e-05	3.34024e-05	GOT1-DT
		645	ENSG00000198466	1498	1.15652	0.0693824	16.6687	2.21317e-62	1.59045e-60	ZNF587
		646	ENSG00000136490	499.487	1.15647	0.110114	10.5025	8.41471e-26	1.16677e-24	LIMD2
		647	ENSG00000265190	234.62	1.1517	0.207889	5.53995	3.0255e-08	1.18517e-07	ANXA8
		648	ENSG00000245025	25.4365	1.15154	0.380092	3.02962	0.00244858	0.00508726	NA
		649	ENSG00000132010	34.8013	1.15132	0.3514	3.27638	0.00105145	0.00233607	ZNF20
		650	ENSG00000135124	245.344	1.14973	0.144147	7.97609	1.51038e-15	1.09653e-14	P2RX4
		651	ENSG00000226608	37.8537	1.14953	0.395401	2.90725	0.00364624	0.00733861	FTLP3
		652	ENSG00000273763	28.6349	1.14938	0.384906	2.98613	0.00282529	0.00579257	NA
		653	ENSG00000186480	2403.29	1.14775	0.182549	6.28732	3.22997e-10	1.52169e-09	INSIG1
		654	ENSG00000268750	32.5951	1.14721	0.406397	2.82287	0.00475953	0.00934934	NA
		655	ENSG00000221947	116.527	1.14588	0.22168	5.16907	2.35258e-07	8.42111e-07	XKR9
		656	ENSG00000232907	33.4191	1.14457	0.39432	2.90263	0.00370042	0.00743392	DLGAP4-AS1
		657	ENSG00000104723	2135.34	1.14365	0.0658175	17.3761	1.25141e-67	1.07371e-65	TUSC3
		658	ENSG00000167840	320.072	1.14232	0.122137	9.35278	8.53774e-21	8.65823e-20	ZNF232
		659	ENSG00000227953	45.5188	1.14047	0.372066	3.06523	0.00217504	0.00456788	LINC01341
		660	ENSG00000279407	130.674	1.14039	0.211341	5.396	6.81442e-08	2.56029e-07	NA
		661	ENSG00000105559	276.589	1.13968	0.156276	7.29271	3.03784e-13	1.83868e-12	PLEKHA4
		662	ENSG00000166450	699.111	1.13932	0.0971594	11.7263	9.3426e-32	1.8193e-30	PRTG
		663	ENSG00000179523	263.687	1.139	0.136698	8.33222	7.93379e-17	6.29236e-16	EIF3J-DT
		664	ENSG00000143341	154.632	1.13898	0.209465	5.43757	5.40111e-08	2.05824e-07	HMCN1
		665	ENSG00000178935	217.392	1.13874	0.145318	7.8362	4.64372e-15	3.23211e-14	ZNF552
		666	ENSG00000224687	35.4668	1.13825	0.339343	3.35429	0.000795697	0.00180408	RASAL2-AS1
		667	ENSG00000124491	128.357	1.13675	0.246113	4.61882	3.85926e-06	1.1971e-05	F13A1
		668	ENSG00000186326	37.1031	1.13653	0.390927	2.90728	0.0036459	0.00733861	RGS9BP
		669	ENSG00000177675	1541.48	1.13638	0.104839	10.8393	2.24225e-27	3.41695e-26	CD163L1
		670	ENSG00000240445	141.843	1.13621	0.213546	5.32066	1.03391e-07	3.82668e-07	FOXO3B
		671	ENSG00000275793	61.229	1.13475	0.325624	3.48485	0.000492409	0.00115205	RIMBP3
		672	ENSG00000139178	164.712	1.13475	0.283422	4.00375	6.23462e-05	0.000165318	C1RL
		673	ENSG00000267152	46.0456	1.13459	0.338786	3.34898	0.000811083	0.00183691	NA
		674	ENSG00000123191	116.877	1.13451	0.274887	4.1272	3.67206e-05	0.000100455	ATP7B
		675	ENSG00000162415	65.6965	1.13436	0.296081	3.83124	0.000127499	0.000324699	ZSWIM5
		676	ENSG00000205534	43.7105	1.1334	0.325684	3.48005	0.000501313	0.00117191	SMG1P2
		677	ENSG00000166387	320.116	1.13298	0.141789	7.99063	1.34248e-15	9.78654e-15	PPFIBP2
		678	ENSG00000143878	1031.84	1.13298	0.234108	4.83953	1.30144e-06	4.25605e-06	RHOB
		679	ENSG00000146733	1439.8	1.13254	0.079948	14.166	1.48831e-45	5.55936e-44	PSPH
		680	ENSG00000196268	201.394	1.13158	0.153273	7.3828	1.54992e-13	9.56919e-13	ZNF493
		681	ENSG00000135953	548.915	1.13144	0.11406	9.91966	3.41921e-23	4.04392e-22	MFSD9
		682	ENSG00000159958	35.7637	1.13082	0.380018	2.97569	0.00292329	0.00597272	TNFRSF13C
		683	ENSG00000133134	167.822	1.13044	0.161582	6.99608	2.6323e-12	1.47761e-11	BEX2
		684	ENSG00000256128	40.8597	1.13035	0.308312	3.66625	0.000246134	0.000599435	LINC00944
		685	ENSG00000245648	33.4901	1.13012	0.398903	2.83306	0.00461044	0.0090842	KLRK1-AS1
		686	ENSG00000066230	165.228	1.12997	0.159334	7.09187	1.32308e-12	7.62349e-12	SLC9A3
		687	ENSG00000052802	1490.57	1.12859	0.0847528	13.3163	1.86168e-40	5.63159e-39	MSMO1
		688	ENSG00000266904	36.5318	1.12855	0.353356	3.1938	0.00140415	0.00305401	LINC00663
		689	ENSG00000124374	134.137	1.12819	0.223439	5.04921	4.43639e-07	1.53748e-06	PAIP2B
		690	ENSG00000233966	88.783	1.12718	0.251047	4.48992	7.1251e-06	2.14571e-05	UBE2SP1
		691	ENSG00000196267	147.808	1.12667	0.232286	4.85038	1.23227e-06	4.04179e-06	ZNF836
		692	ENSG00000143434	67.3042	1.12667	0.300936	3.74389	0.000181194	0.000450979	SEMA6C
		693	ENSG00000236829	21.1847	1.12651	0.446018	2.52571	0.0115465	0.0209327	NA
		694	ENSG00000106069	25.0572	1.12444	0.416623	2.69893	0.0069562	0.0132311	CHN2
		695	ENSG00000228624	49.7993	1.12396	0.340795	3.29806	0.000973566	0.00217325	HDAC2-AS2
		696	ENSG00000260852	180.057	1.12203	0.154318	7.2709	3.57103e-13	2.15037e-12	FBXL19-AS1
		697	ENSG00000259972	86.7159	1.1218	0.227773	4.92508	8.4324e-07	2.81683e-06	NA
		698	ENSG00000244879	1606.22	1.12179	0.0656863	17.078	2.16304e-65	1.72035e-63	GABPB1-AS1
		699	ENSG00000112972	1581.28	1.12149	0.0745849	15.0364	4.23946e-51	1.92984e-49	HMGCS1
		700	ENSG00000196597	221.419	1.12143	0.1644	6.82137	9.01784e-12	4.83033e-11	ZNF782
		701	ENSG00000198934	82.9138	1.12082	0.264541	4.23685	2.26682e-05	6.37618e-05	MAGEE1
		702	ENSG00000144199	298.027	1.12057	0.135065	8.29653	1.07195e-16	8.42149e-16	FAHD2B
		703	ENSG00000162729	447.028	1.11717	0.115972	9.63311	5.79461e-22	6.35924e-21	IGSF8
		704	ENSG00000148384	1596.6	1.11709	0.0649434	17.201	2.60847e-66	2.11018e-64	INPP5E
		705	ENSG00000273373	121.092	1.11691	0.249327	4.47967	7.47576e-06	2.24749e-05	SLC16A4-AS1
		706	ENSG00000160932	2636.36	1.11618	0.0810362	13.7738	3.66251e-43	1.2494e-41	LY6E
		707	ENSG00000262003	51.242	1.11599	0.298124	3.74336	0.000181578	0.000451854	NA
		708	ENSG00000160867	84.4076	1.11578	0.267318	4.17399	2.99308e-05	8.30117e-05	FGFR4
		709	ENSG00000227039	83.6239	1.11566	0.22313	5.00003	5.73201e-07	1.95773e-06	ITGB2-AS1
		710	ENSG00000107281	880.805	1.11531	0.10291	10.8378	2.27923e-27	3.46957e-26	NPDC1
		711	ENSG00000213967	79.7687	1.11481	0.232774	4.78924	1.6741e-06	5.39747e-06	ZNF726
		712	ENSG00000114790	2480.27	1.11416	0.0996355	11.1823	4.97685e-29	8.32827e-28	ARHGEF26
		713	ENSG00000111907	153.096	1.11177	0.18181	6.11497	9.65736e-10	4.36663e-09	TPD52L1
		714	ENSG00000280079	153.052	1.11129	0.191002	5.81823	5.94728e-09	2.49691e-08	NA
		715	ENSG00000182318	266.768	1.11078	0.147556	7.52785	5.15812e-14	3.30124e-13	ZSCAN22
		716	ENSG00000247828	388.853	1.10967	0.102733	10.8015	3.38757e-27	5.1237e-26	TMEM161B-DT
		717	ENSG00000204623	155.716	1.10954	0.178466	6.21711	5.06403e-10	2.34669e-09	POLR1HASP
		718	ENSG00000229563	37.0483	1.10953	0.360475	3.07797	0.00208414	0.00439327	LINC01204
		719	ENSG00000272777	26.3471	1.10941	0.394064	2.81531	0.00487308	0.00955648	NA
		720	ENSG00000147408	244.618	1.10929	0.348052	3.18713	0.00143694	0.00311766	CSGALNACT1
		721	ENSG00000161682	190.673	1.10877	0.224621	4.93617	7.96733e-07	2.66714e-06	FAM171A2
		722	ENSG00000154310	353.071	1.10867	0.144896	7.65149	1.9867e-14	1.31922e-13	TNIK
		723	ENSG00000151388	1563.72	1.10482	0.0673804	16.3968	2.01495e-60	1.37143e-58	ADAMTS12
		724	ENSG00000240038	26.0356	1.10271	0.412545	2.67295	0.00751882	0.014185	AMY2B
		725	ENSG00000147874	2876.94	1.10025	0.0670329	16.4136	1.52768e-60	1.05499e-58	HAUS6
		726	ENSG00000177738	126.424	1.09929	0.189886	5.7892	7.07214e-09	2.9378e-08	ANXA2R-OT1
		727	ENSG00000213801	44.4567	1.09715	0.327815	3.34686	0.000817338	0.00184871	ZNF321P
		728	ENSG00000267383	131.168	1.09608	0.213331	5.13792	2.77797e-07	9.86646e-07	NA
		729	ENSG00000173930	72.0428	1.0959	0.282891	3.87392	0.000107097	0.000275819	SLCO4C1
		730	ENSG00000204876	234.19	1.09535	0.166811	6.56642	5.15403e-11	2.59941e-10	NA
		731	ENSG00000070087	3550.63	1.0944	0.0625959	17.4835	1.91345e-68	1.7254e-66	PFN2
		732	ENSG00000266777	22.0152	1.09413	0.408048	2.68137	0.00733207	0.0138789	SH3GL1P1
		733	ENSG00000230882	94.6155	1.09341	0.268222	4.07651	4.57168e-05	0.000123537	NA
		734	ENSG00000171227	45.3335	1.09252	0.437982	2.49443	0.012616	0.0227174	TMEM37
		735	ENSG00000254838	109.921	1.09175	0.242676	4.49878	6.83446e-06	2.0617e-05	GVINP1
		736	ENSG00000132109	826.079	1.09165	0.0874428	12.4841	9.11307e-36	2.18667e-34	TRIM21
		737	ENSG00000185880	254.35	1.09147	0.186701	5.8461	5.03218e-09	2.12658e-08	TRIM69
		738	ENSG00000173221	1369.45	1.09146	0.0811546	13.4492	3.11297e-41	9.72855e-40	GLRX
		739	ENSG00000161551	187.236	1.09139	0.179224	6.08953	1.13241e-09	5.09098e-09	ZNF577
		740	ENSG00000182154	2230.71	1.09135	0.0753718	14.4796	1.62995e-47	6.59293e-46	MRPL41
		741	ENSG00000148082	1755.37	1.09087	0.0956052	11.4102	3.71935e-30	6.56545e-29	SHC3
		742	ENSG00000258659	124.265	1.0907	0.192927	5.65346	1.5725e-08	6.32262e-08	TRIM34
		743	ENSG00000119508	25.9925	1.0897	0.424186	2.56891	0.010202	0.0187036	NR4A3
		744	ENSG00000178150	777.924	1.08958	0.150985	7.21645	5.33618e-13	3.1635e-12	ZNF114
		745	ENSG00000090339	1139.09	1.08826	0.128003	8.50182	1.86647e-17	1.54163e-16	ICAM1
		746	ENSG00000112599	54.6239	1.0877	0.283743	3.8334	0.000126386	0.000322329	GUCA1B
		747	ENSG00000245205	21.828	1.08688	0.402319	2.70154	0.00690184	0.0131418	EEF1A1P4
		748	ENSG00000181220	1180.76	1.08667	0.0936825	11.5995	4.14719e-31	7.74562e-30	ZNF746
		749	ENSG00000235453	50.9067	1.08479	0.328902	3.2982	0.000973056	0.00217246	SMIM27
		750	ENSG00000137070	127.551	1.08447	0.220048	4.92835	8.29279e-07	2.77347e-06	IL11RA
		751	ENSG00000261824	566.685	1.08376	0.104114	10.4094	2.2462e-25	3.01417e-24	LINC00662
		752	ENSG00000070159	1722.33	1.08238	0.0804491	13.4542	2.90987e-41	9.11395e-40	PTPN3
		753	ENSG00000244588	25.5885	1.08129	0.437402	2.47209	0.0134328	0.0240749	RAD21L1
		754	ENSG00000246082	300.604	1.07946	0.129914	8.30905	9.64689e-17	7.59995e-16	NUDT16L2P
		755	ENSG00000167925	1270.82	1.07915	0.0683275	15.7939	3.42943e-56	1.92661e-54	GHDC
		756	ENSG00000136630	100.411	1.07872	0.261898	4.11885	3.80775e-05	0.000103926	HLX
		757	ENSG00000178075	304.189	1.07798	0.15999	6.73782	1.60778e-11	8.41452e-11	GRAMD1C
		758	ENSG00000197054	26.9313	1.07758	0.403728	2.66907	0.00760619	0.0143307	ZNF763
		759	ENSG00000259974	1214.08	1.07647	0.13567	7.93448	2.1138e-15	1.50908e-14	LINC00261
		760	ENSG00000079841	64.1118	1.07622	0.293709	3.66422	0.00024809	0.00060368	RIMS1
		761	ENSG00000258603	34.581	1.07587	0.344081	3.12679	0.00176725	0.0037753	NA
		762	ENSG00000223891	201.019	1.07579	0.184953	5.81653	6.00836e-09	2.52105e-08	OSER1-DT
		763	ENSG00000116701	462.77	1.07428	0.171477	6.26487	3.73133e-10	1.74742e-09	NCF2
		764	ENSG00000197816	90.2605	1.07416	0.246041	4.36576	1.26681e-05	3.68563e-05	CCDC180
		765	ENSG00000172687	365.563	1.0734	0.11126	9.64768	5.02815e-22	5.53527e-21	ZNF738
		766	ENSG00000180616	153.867	1.07288	0.207862	5.16148	2.45011e-07	8.7503e-07	SSTR2
		767	ENSG00000227674	22.6112	1.0726	0.405157	2.64737	0.00811213	0.0151929	LINC00355
		768	ENSG00000165118	1522.4	1.07237	0.0650573	16.4835	4.82334e-61	3.36374e-59	C9orf64
		769	ENSG00000224886	36.8967	1.07197	0.347876	3.08146	0.00205988	0.0043486	NA
		770	ENSG00000280077	80.4666	1.07176	0.235156	4.55764	5.17309e-06	1.58005e-05	NA
		771	ENSG00000111058	1009.34	1.07151	0.0976917	10.9683	5.42697e-28	8.58431e-27	ACSS3
		772	ENSG00000103490	150.4	1.07088	0.21095	5.07645	3.84547e-07	1.34321e-06	PYCARD
		773	ENSG00000237765	722.559	1.06871	0.0932347	11.4626	2.03423e-30	3.67114e-29	FAM200B
		774	ENSG00000221886	280.223	1.06825	0.159143	6.71251	1.91311e-11	9.9683e-11	ZBED8
		775	ENSG00000106404	272.039	1.06557	0.136786	7.79005	6.6983e-15	4.59437e-14	CLDN15
		776	ENSG00000178301	39.9591	1.06419	0.321203	3.31316	0.00092249	0.00206641	AQP11
		777	ENSG00000148158	1327.65	1.06383	0.100791	10.5548	4.82695e-26	6.80628e-25	SNX30
		778	ENSG00000286132	181.094	1.063	0.169046	6.28824	3.21076e-10	1.51314e-09	NA
		779	ENSG00000196335	52.2517	1.06242	0.369999	2.87142	0.00408638	0.00814457	STK31
		780	ENSG00000068078	90.8851	1.0624	0.213389	4.97872	6.40058e-07	2.17349e-06	FGFR3
		781	ENSG00000160469	190.371	1.06206	0.164796	6.44467	1.15856e-10	5.66356e-10	BRSK1
		782	ENSG00000182752	570.628	1.06065	0.117481	9.0283	1.7436e-19	1.63905e-18	PAPPA
		783	ENSG00000154556	264.383	1.06029	0.408037	2.59852	0.00936256	0.0172901	SORBS2
		784	ENSG00000141854	45.2349	1.05994	0.413481	2.56344	0.0103639	0.0189809	MISP3
		785	ENSG00000287168	100.085	1.0595	0.219571	4.82531	1.39784e-06	4.54925e-06	NA
		786	ENSG00000197417	160.401	1.05949	0.175648	6.03189	1.62058e-09	7.1875e-09	SHPK
		787	ENSG00000152503	731.938	1.05686	0.0901888	11.7183	1.0268e-31	1.99402e-30	TRIM36
		788	ENSG00000107140	853.424	1.05645	0.0875778	12.0629	1.65744e-33	3.57688e-32	TESK1
		789	ENSG00000153879	4169.78	1.0552	0.0634926	16.6193	5.05178e-62	3.60777e-60	CEBPG
		790	ENSG00000174456	138.43	1.05493	0.173281	6.08798	1.14345e-09	5.13736e-09	C12orf76
		791	ENSG00000223345	31.3053	1.05486	0.396403	2.66109	0.00778881	0.0146416	H2BP1
		792	ENSG00000288612	24.5489	1.05436	0.406947	2.59091	0.00957238	0.0176453	NA
		793	ENSG00000260219	22.5956	1.05242	0.434221	2.4237	0.0153632	0.0271464	CD2BP2-DT
		794	ENSG00000288473	24.5985	1.05225	0.403063	2.61063	0.00903748	0.0167378	NA
		795	ENSG00000167528	366.359	1.05213	0.114824	9.16292	5.05109e-20	4.92821e-19	ZNF641
		796	ENSG00000152689	191.335	1.05102	0.175629	5.98435	2.17253e-09	9.52215e-09	RASGRP3
		797	ENSG00000271857	35.9592	1.05019	0.346314	3.03248	0.00242554	0.00504309	NA
		798	ENSG00000273213	60.2865	1.0489	0.25218	4.15933	3.19178e-05	8.80991e-05	H3-7
		799	ENSG00000127081	250.074	1.04858	0.174178	6.02019	1.74217e-09	7.70264e-09	ZNF484
		800	ENSG00000196584	1771.03	1.04845	0.0727889	14.4039	4.88761e-47	1.94912e-45	XRCC2
		801	ENSG00000254726	117.979	1.04769	0.205141	5.10717	3.27028e-07	1.15053e-06	MEX3A
		802	ENSG00000246889	56.8046	1.04495	0.263692	3.96277	7.40849e-05	0.00019455	CTTN-DT
		803	ENSG00000138031	2539.47	1.04411	0.0664462	15.7136	1.22048e-55	6.64554e-54	ADCY3
		804	ENSG00000148200	177.185	1.04307	0.181866	5.73537	9.73018e-09	3.99855e-08	NR6A1
		805	ENSG00000184602	206.821	1.04269	0.175864	5.92896	3.04865e-09	1.31464e-08	SNN
		806	ENSG00000188785	320.282	1.04151	0.114444	9.10062	8.98149e-20	8.62625e-19	ZNF548
		807	ENSG00000198464	999.013	1.04058	0.0864686	12.0342	2.35011e-33	5.01063e-32	ZNF480
		808	ENSG00000155085	165.504	1.04047	0.171579	6.06408	1.32708e-09	5.92666e-09	AK9
		809	ENSG00000128482	86.269	1.04011	0.269631	3.85754	0.000114533	0.000294006	RNF112
		810	ENSG00000275131	503.344	1.0394	0.123355	8.42608	3.57431e-17	2.90147e-16	PDE4DIPP2
		811	ENSG00000176978	3046.46	1.03925	0.0672763	15.4474	7.84959e-54	3.95468e-52	DPP7
		812	ENSG00000277152	35.6947	1.03913	0.388463	2.67498	0.00747348	0.0141107	NA
		813	ENSG00000155189	2533.36	1.03891	0.0906243	11.4639	2.00183e-30	3.61941e-29	AGPAT5
		814	ENSG00000091436	9923.65	1.03882	0.0756867	13.7253	7.1594e-43	2.41899e-41	MAP3K20
		815	ENSG00000224189	1020.98	1.03637	0.0860181	12.0483	1.97915e-33	4.24527e-32	HAGLR
		816	ENSG00000174564	34.0436	1.03631	0.355948	2.9114	0.00359814	0.00725005	IL20RB
		817	ENSG00000153823	362.627	1.03532	0.142554	7.26264	3.79596e-13	2.27999e-12	PID1
		818	ENSG00000108106	15553.6	1.0353	0.0666047	15.544	1.74713e-54	9.16081e-53	UBE2S
		819	ENSG00000139044	47.0202	1.03481	0.399189	2.59229	0.00953399	0.0175837	B4GALNT3
		820	ENSG00000166813	1447.3	1.03481	0.0778008	13.3008	2.29004e-40	6.89791e-39	KIF7
		821	ENSG00000082014	305.941	1.03456	0.15006	6.89431	5.41283e-12	2.95183e-11	SMARCD3
		822	ENSG00000175322	207.34	1.03444	0.147631	7.00697	2.43537e-12	1.37197e-11	ZNF519
		823	ENSG00000153071	1538.93	1.03376	0.0683203	15.1311	1.01001e-51	4.67279e-50	DAB2
		824	ENSG00000056558	823.541	1.03254	0.0903613	11.4268	3.07315e-30	5.47253e-29	TRAF1
		825	ENSG00000092969	3964.94	1.03243	0.0574156	17.9817	2.71139e-72	2.78153e-70	TGFB2
		826	ENSG00000070610	2316.22	1.03217	0.0542579	19.0233	1.09355e-80	1.43347e-78	GBA2
		827	ENSG00000072163	716.816	1.03115	0.0846452	12.182	3.87489e-34	8.61175e-33	LIMS2
		828	ENSG00000128536	51.644	1.03068	0.300673	3.4279	0.000608272	0.00140478	CDHR3
		829	ENSG00000165868	880.714	1.03012	0.0834371	12.3461	5.11265e-35	1.1885e-33	HSPA12A
		830	ENSG00000214595	456.232	1.02981	0.11128	9.25429	2.1566e-20	2.14253e-19	EML6
		831	ENSG00000175155	56.9647	1.02956	0.308021	3.3425	0.000830275	0.00187557	YPEL2
		832	ENSG00000159899	193.89	1.02949	0.172779	5.95843	2.54667e-09	1.10627e-08	2
		833	ENSG00000096696	7704.43	1.02899	0.0620247	16.59	8.22593e-62	5.82273e-60	DSP
		834	ENSG00000186812	277.96	1.02887	0.145574	7.06766	1.57566e-12	9.02372e-12	ZNF397
		835	ENSG00000152527	327.653	1.02881	0.130659	7.87405	3.43346e-15	2.4075e-14	PLEKHH2
		836	ENSG00000245248	25.6598	1.02875	0.457664	2.24783	0.0245871	0.0416911	USP2-AS1
		837	ENSG00000136870	496.706	1.0282	0.122837	8.37047	5.73905e-17	4.60327e-16	ZNF189
		838	ENSG00000280152	140.821	1.02817	0.2007	5.12293	3.00819e-07	1.06308e-06	NA
		839	ENSG00000150510	72.9137	1.02711	0.286129	3.58967	0.000331094	0.000790193	FAM124A
		840	ENSG00000160219	49.4122	1.02689	0.329915	3.11259	0.00185454	0.00394748	GAB3
		841	ENSG00000151617	80.6726	1.02666	0.297016	3.45658	0.000547068	0.00127236	EDNRA
		842	ENSG00000135740	197.18	1.02638	0.148141	6.9284	4.25614e-12	2.33634e-11	SLC9A5
		843	ENSG00000237149	40.6264	1.0259	0.318124	3.22484	0.00126045	0.00276012	ZNF503-AS2
		844	ENSG00000148344	2348.74	1.02582	0.48225	2.12716	0.0334065	0.054967	PTGES
		845	ENSG00000159905	161.786	1.02478	0.157132	6.52179	6.94734e-11	3.4595e-10	ZNF221
		846	ENSG00000259985	55.1229	1.02458	0.293541	3.49042	0.00048226	0.00112942	NA
		847	ENSG00000205730	3370.44	1.02393	0.0719505	14.2311	5.87531e-46	2.25411e-44	ITPRIPL2
		848	ENSG00000171224	318.844	1.02193	0.132564	7.70901	1.26798e-14	8.51963e-14	FAM241B
		849	ENSG00000267060	50.6108	1.02139	0.325697	3.13602	0.00171259	0.00366794	PTGES3L
		850	ENSG00000215126	117.128	1.02125	0.1908	5.35249	8.67532e-08	3.23116e-07	ZNG1F
		851	ENSG00000277806	23.4495	1.02094	0.403234	2.53188	0.0113453	0.020605	NA
		852	ENSG00000247595	21.1926	1.01944	0.427205	2.3863	0.0170187	0.0298444	SPTY2D1OS
		853	ENSG00000225138	275.979	1.01901	0.161086	6.3259	2.51754e-10	1.19963e-09	SLC9A3-AS1
		854	ENSG00000269439	69.3323	1.01556	0.247815	4.09808	4.16591e-05	0.000113134	PGLS-DT
		855	ENSG00000170835	65.1084	1.01438	0.271028	3.74272	0.000182039	0.000452762	CEL
		856	ENSG00000121417	602.481	1.01409	0.0991463	10.2282	1.48256e-24	1.92379e-23	ZNF211
		857	ENSG00000270157	61.4505	1.01401	0.280909	3.60975	0.000306491	0.000735173	NA
		858	ENSG00000197070	1335.19	1.01315	0.0755395	13.4121	5.13505e-41	1.58381e-39	ARRDC1
		859	ENSG00000137198	650.143	1.01291	0.102771	9.856	6.45725e-23	7.50536e-22	GMPR
		860	ENSG00000177599	48.491	1.01197	0.342105	2.95806	0.0030958	0.00629792	ZNF491
		861	ENSG00000171448	368.822	1.01163	0.118716	8.5214	1.57638e-17	1.31275e-16	ZBTB26
		862	ENSG00000205041	100.47	1.00964	0.252625	3.9966	6.42583e-05	0.000169943	NA
		863	ENSG00000275457	60.3295	1.00873	0.28746	3.5091	0.00044962	0.00105718	NA
		864	ENSG00000255108	20.3105	1.008	0.510645	1.97398	0.0483838	0.0767404	NA
		865	ENSG00000189144	122.958	1.00765	0.194094	5.19157	2.08532e-07	7.51384e-07	ZNF573
		866	ENSG00000160336	698.914	1.00656	0.108186	9.30399	1.35277e-20	1.3544e-19	ZNF761
		867	ENSG00000160336	698.914	1.00656	0.108186	9.30399	1.35277e-20	1.3544e-19	ZNF761
		868	ENSG00000267058	32.3154	1.00553	0.350479	2.86901	0.00411753	0.00820088	NA
		869	ENSG00000196417	438.848	1.00537	0.116492	8.63033	6.11751e-18	5.22349e-17	ZNF765
		870	ENSG00000167646	65.542	1.0047	0.27618	3.63786	0.00027491	0.00066494	DNAAF3
		871	ENSG00000234665	82.5894	1.00461	0.24506	4.09944	4.14154e-05	0.000112559	LERFS
		872	ENSG00000132801	153.753	1.00434	0.172777	5.81293	6.13877e-09	2.57196e-08	ZSWIM3
		873	ENSG00000248323	452.676	1.00426	0.125848	7.98001	1.46324e-15	1.06286e-14	LUCAT1
		874	ENSG00000240184	376.284	1.00327	0.116877	8.58399	9.16414e-18	7.73624e-17	PCDHGC3
		875	ENSG00000230185	26.6444	1.00323	0.406849	2.46586	0.0136683	0.0244506	HSDL2-AS1
		876	ENSG00000059769	788.423	1.00205	0.101672	9.85572	6.4748e-23	7.51958e-22	DNAJC25
		877	ENSG00000255624	140.102	1.00025	0.180503	5.54148	2.99923e-08	1.17553e-07	C10orf88B
		878	ENSG00000197951	421.053	1.0002	0.113363	8.82296	1.11472e-18	9.95651e-18	ZNF71
		879	ENSG00000228502	50.1848	1.00004	0.311127	3.21423	0.00130793	0.00285746	EEF1A1P11
