# Supplementary material
Source: Research Square preprint supplement (doi:10.21203/rs.3.rs-9917734/v1)
Supplement: Supplementary file 5 [file e69700e8abaa8455567f7088.xlsx]

## Sheet: Sheet1
	Table 2. List of primers
Gene (Human)	Primer sequence
ACTIN	NA / Qiagen, Cat # QT00095431
AXIN-2	F5’-CAAACTTTCGCCAACCGTGGTTG-3’
	R5’-GGTGCAAAGACATAGCCAGAACC-3’
MMP14	F5’-CCAGCAACTTTATGGGGGTG-3’
	R5’-GGCCCATAGGTGGGGTTTTT-3’
MMP16	F5’-TCAGCACTGGAAGACGGTTG-3’
	R5’-CCGTACTTTTGTAACCAAACCTCC-3’
Neu	F5’-TTC CGG AAC CCA CAT CAG GCC-3’
	R5’-GTT TCC TGC AGC AGC CTA CGC-3’
CdGAP WT	F5’-GAAGACAAGCCCGATTCCTG-3’
	R5’-GGGCTTGCAATAGCTTCCTC-3’
CdGAP KI	F5’-GAAGACAAGCACGATTTAAG-3’
	R5’-TCTCAAACAGAAGCATTTCC-3’
