# Supplementary material
Source: Research Square preprint supplement (doi:10.21203/rs.3.rs-9917734/v1)
Supplement: Supplementary file 6 [file a6f7bffb1ef29262d3307cdf.pdf]

## Supplementary Figure 6

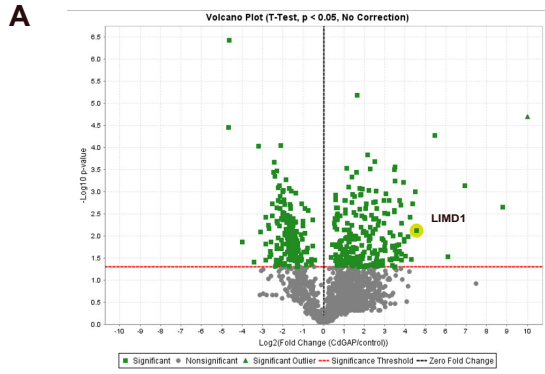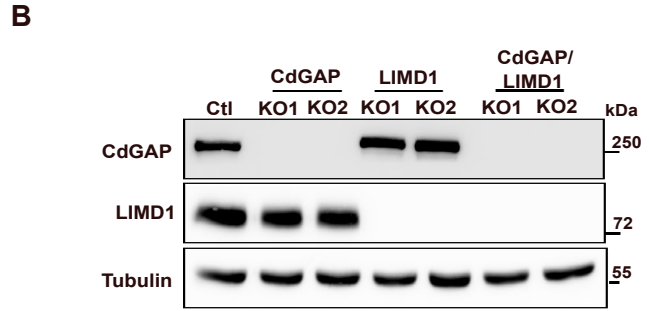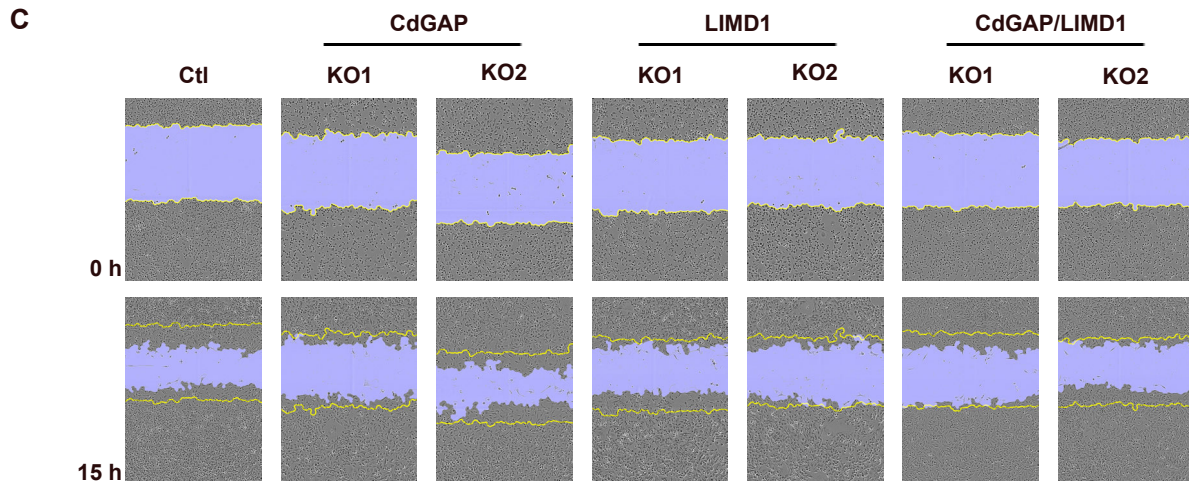

**D**

Multiple unpaired test of migration in MDA-MB-231 cells

| Time (h) | Mean of CTL | CdGAP KO |             |         |             | LIMD1 KO  |             |           |             | CdGAP/LIMD1 KO |             |          |             |
|----------|-------------|----------|-------------|---------|-------------|-----------|-------------|-----------|-------------|----------------|-------------|----------|-------------|
|          |             | P value  | Mean of KO1 | P value | Mean of KO2 | P value   | Mean of KO1 | P value   | Mean of KO2 | P value        | Mean of KO1 | P value  | Mean of KO2 |
| 0        | 1.069       | 0.009033 | 0.7459      | 0.11408 | 1.358       | 0.178141  | 1.244       | 0.603116  | 1.156       | 0.280815       | 1.309       | 0.749908 | 1.007       |
| 3        | 14.81       | 0.000003 | 9.384       | 3.7E-05 | 10.42       | <0.000001 | 6.427       | <0.000001 | 8.748       | 0.000031       | 7.319       | 0.000023 | 6.953       |
| 6        | 23.78       | 0.000013 | 16.28       | 0.00051 | 18.22       | <0.000001 | 10.66       | <0.000001 | 13.65       | 0.000158       | 13.21       | 0.000084 | 12.02       |
| 9        | 32.29       | 0.000027 | 23.12       | 0.00168 | 25.95       | <0.000001 | 15.57       | <0.000001 | 19.51       | 0.000274       | 19          | 0.00013  | 17.5        |
| 12       | 41.27       | 0.000019 | 29.14       | 0.006   | 34.5        | <0.000001 | 20.17       | <0.000001 | 24.94       | 0.000343       | 24.6        | 0.000206 | 23.09       |
| 15       | 49.46       | 0.000046 | 35.54       | 0.01119 | 42.51       | <0.000001 | 24.62       | <0.000001 | 30.36       | 0.000251       | 29.57       | 0.000131 | 28.01       |
