# Supplementary material
Source: Research Square preprint supplement (doi:10.21203/rs.3.rs-9917734/v1)
Supplement: Supplementary file 6 [file e74f399a19af58eecd5c2f5c.xlsx]

## Sheet: Sheet1
Table 1. List of gRNAs
Condition	sgRNA	Sequence	Target
KO human CdGAP	Set 1	REV1 AAACCAGCGGAGATCAGTAATTCTC	Exon 12
		FW1 CACCGAGAATTACTGATCTCCGCTG
	Set 2	REV2 AAACCTCTGCTTGGCACCGCTGTAC	Exon 1
		FW2 CACCGTACAGCGGTGCCAAGCAGAG
	Set 3	REV3 AAACCTTTGGGACTAACTCATGAAC	Exon 1
		FW3 CACCGTTCATGAGTTAGTCCCAAAG
KI p.Gln683X human CdGAP	Set 1	REV1 AAACATTCAGCCTATTCTCGAGTC	Exon 12
		FW1 CACCGACTCGAGAATAGGCTGATT
	Set 2	REV2 AAACGCCCAATTCAGCCTATTCTC	Exon 12
		FW2 CACCGAGAATAGGCTGAATTGGGC
	Set 3	REV3 AAACAATTCAGCCTATTCTCGAGTC	Exon 12
		FW3 CACCGACTCGAGAATAGGCTGAATT
KO human LIMD1	Set 1	REV1 AAACCGATGAATTTACTGGCCTCC	After ATG
		FW1 CACCGGAGGCCAGTAAATTCATCG
	Set 2	REV2 AAACAGGTCGTCATACTTATCCATC	Start Exon 1
		FW2 CACCGATGGATAAGTATGACGACCT
	Set 3	REV3 AAACTCGGGTGAGCATCCATCTCTC	End exon 1
		FW3 CACCGAGAGATGGATGCTCACCCGA
KI p.P668T P670X mouse CdGAP	Set 1	REV1 AAACCTGGGCTTGACTCAGGAATCC	Exon 12
		FW1 CACCGGATTCCTGAGTCAAGCCCAG
	Set 2	REV2 AAACAATGGGGCTGGGCTTGACTCC	Exon 12
		FW2 CACCGGAGTCAAGCCCAGCCCCATT
	Set 3	REV3 AAACGCTGGGCTTGACTCAGGAATC	Exon 12
		FW3 CACCGATTCCTGAGTCAAGCCCAGC
