# Supplementary material
Source: Research Square preprint supplement (doi:10.21203/rs.3.rs-9917734/v1)

# Supplementary Figure 1

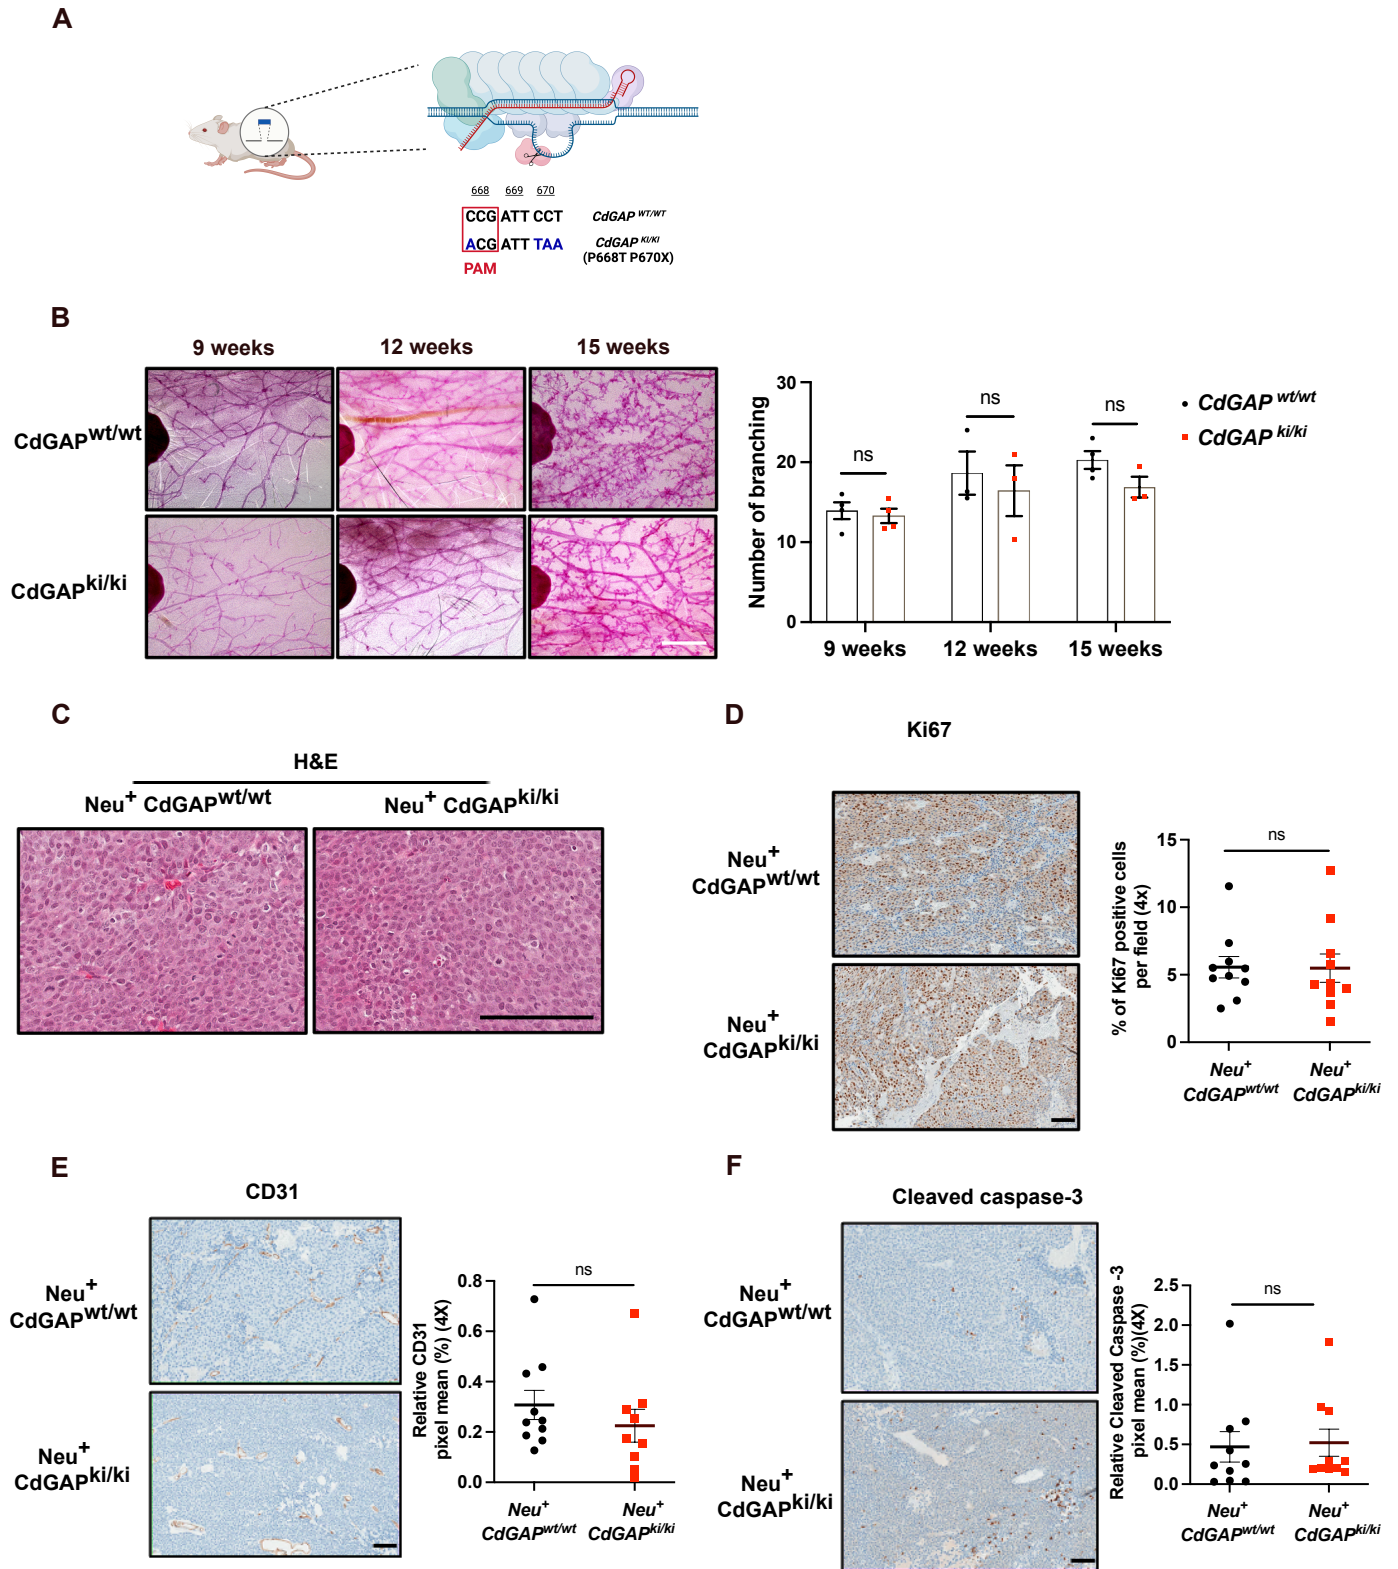

Supplement: Supplementary file 1 [file 4367476d5d62dfa6d3f5ad83.pdf]

Supplementary Figure 7

A

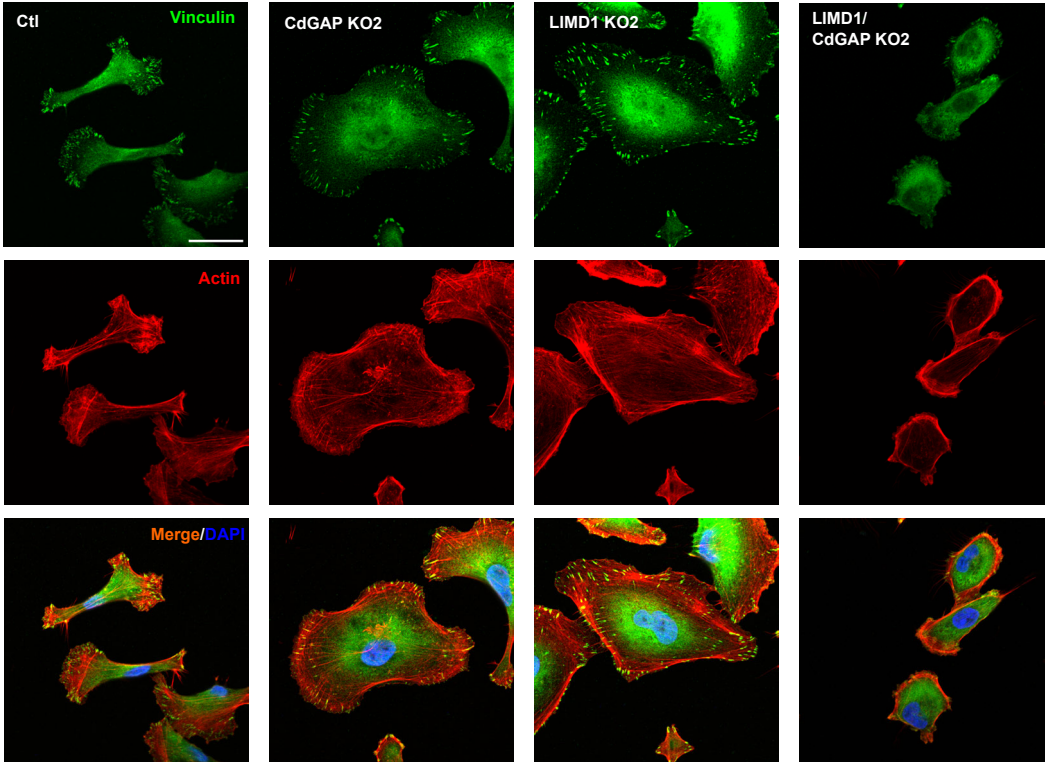

B

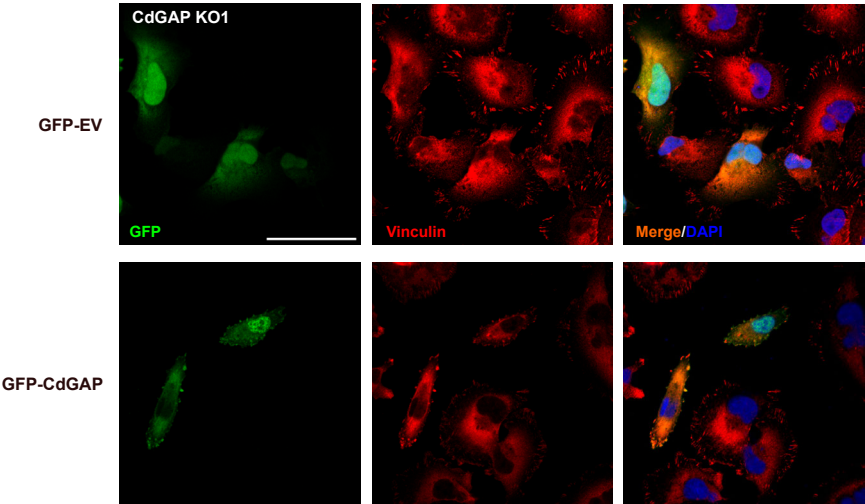

C

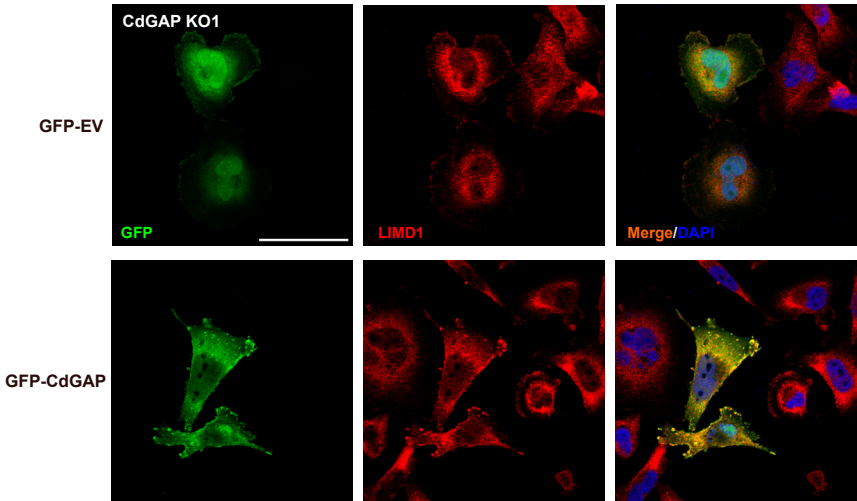

Supplement: Supplementary file 2 [file 5e5d92e0d2ac91ca951e409b.pdf]

Supplementary Figure 5

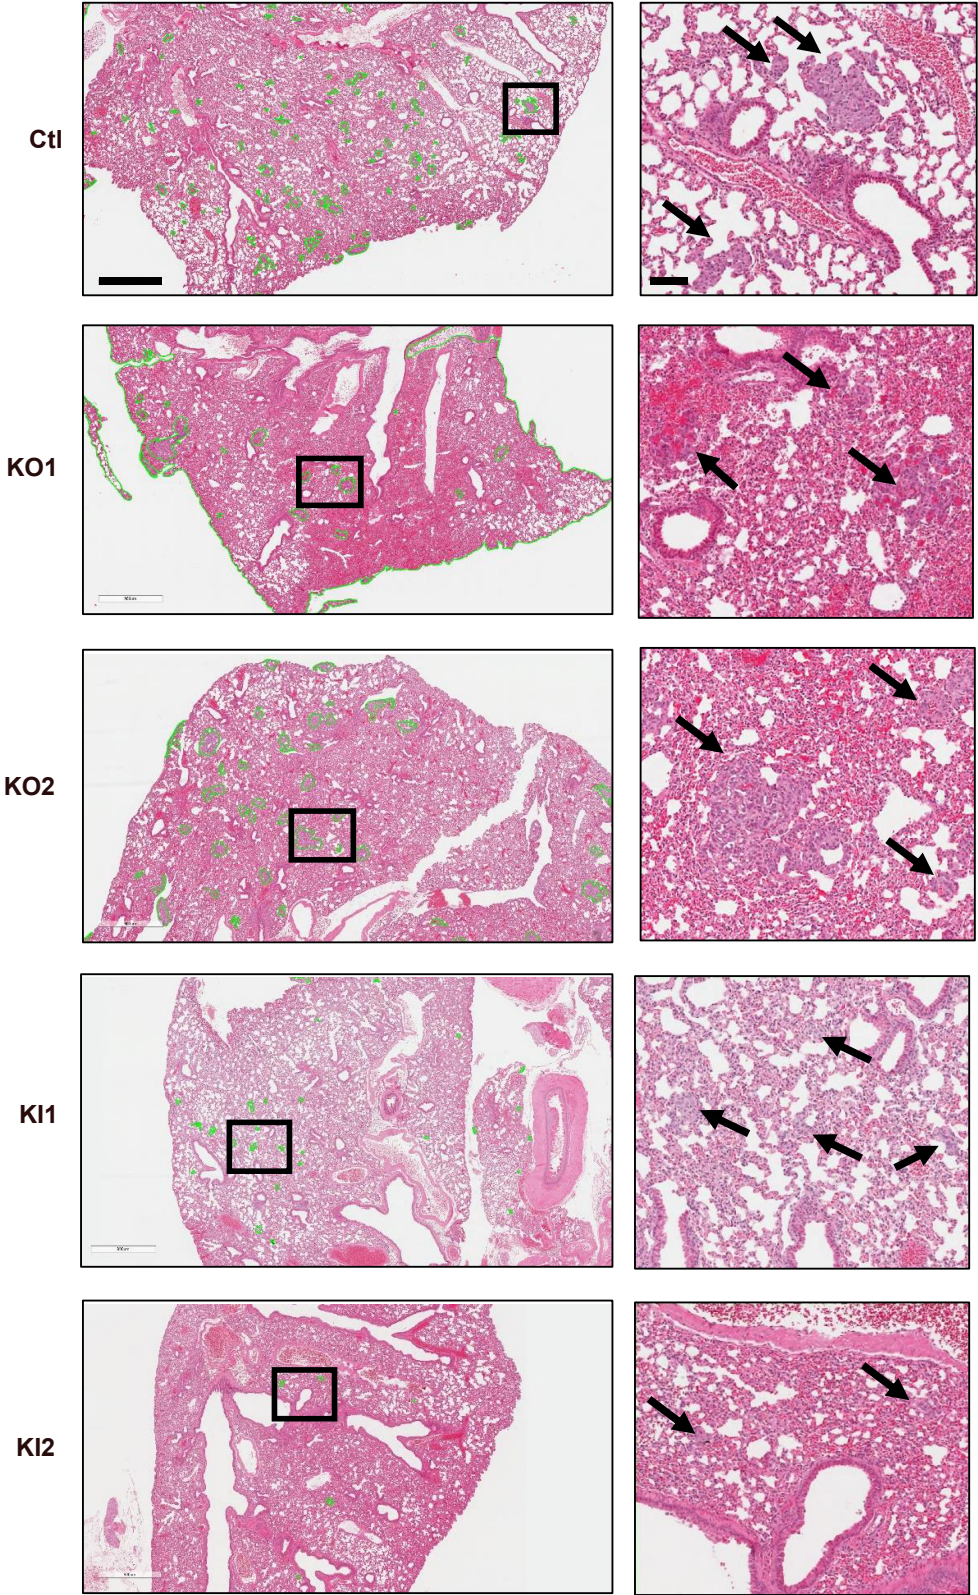

Supplement: Supplementary file 4 [file 961d47a775994a4e9805c914.pdf]

# Supplementary Figure 8

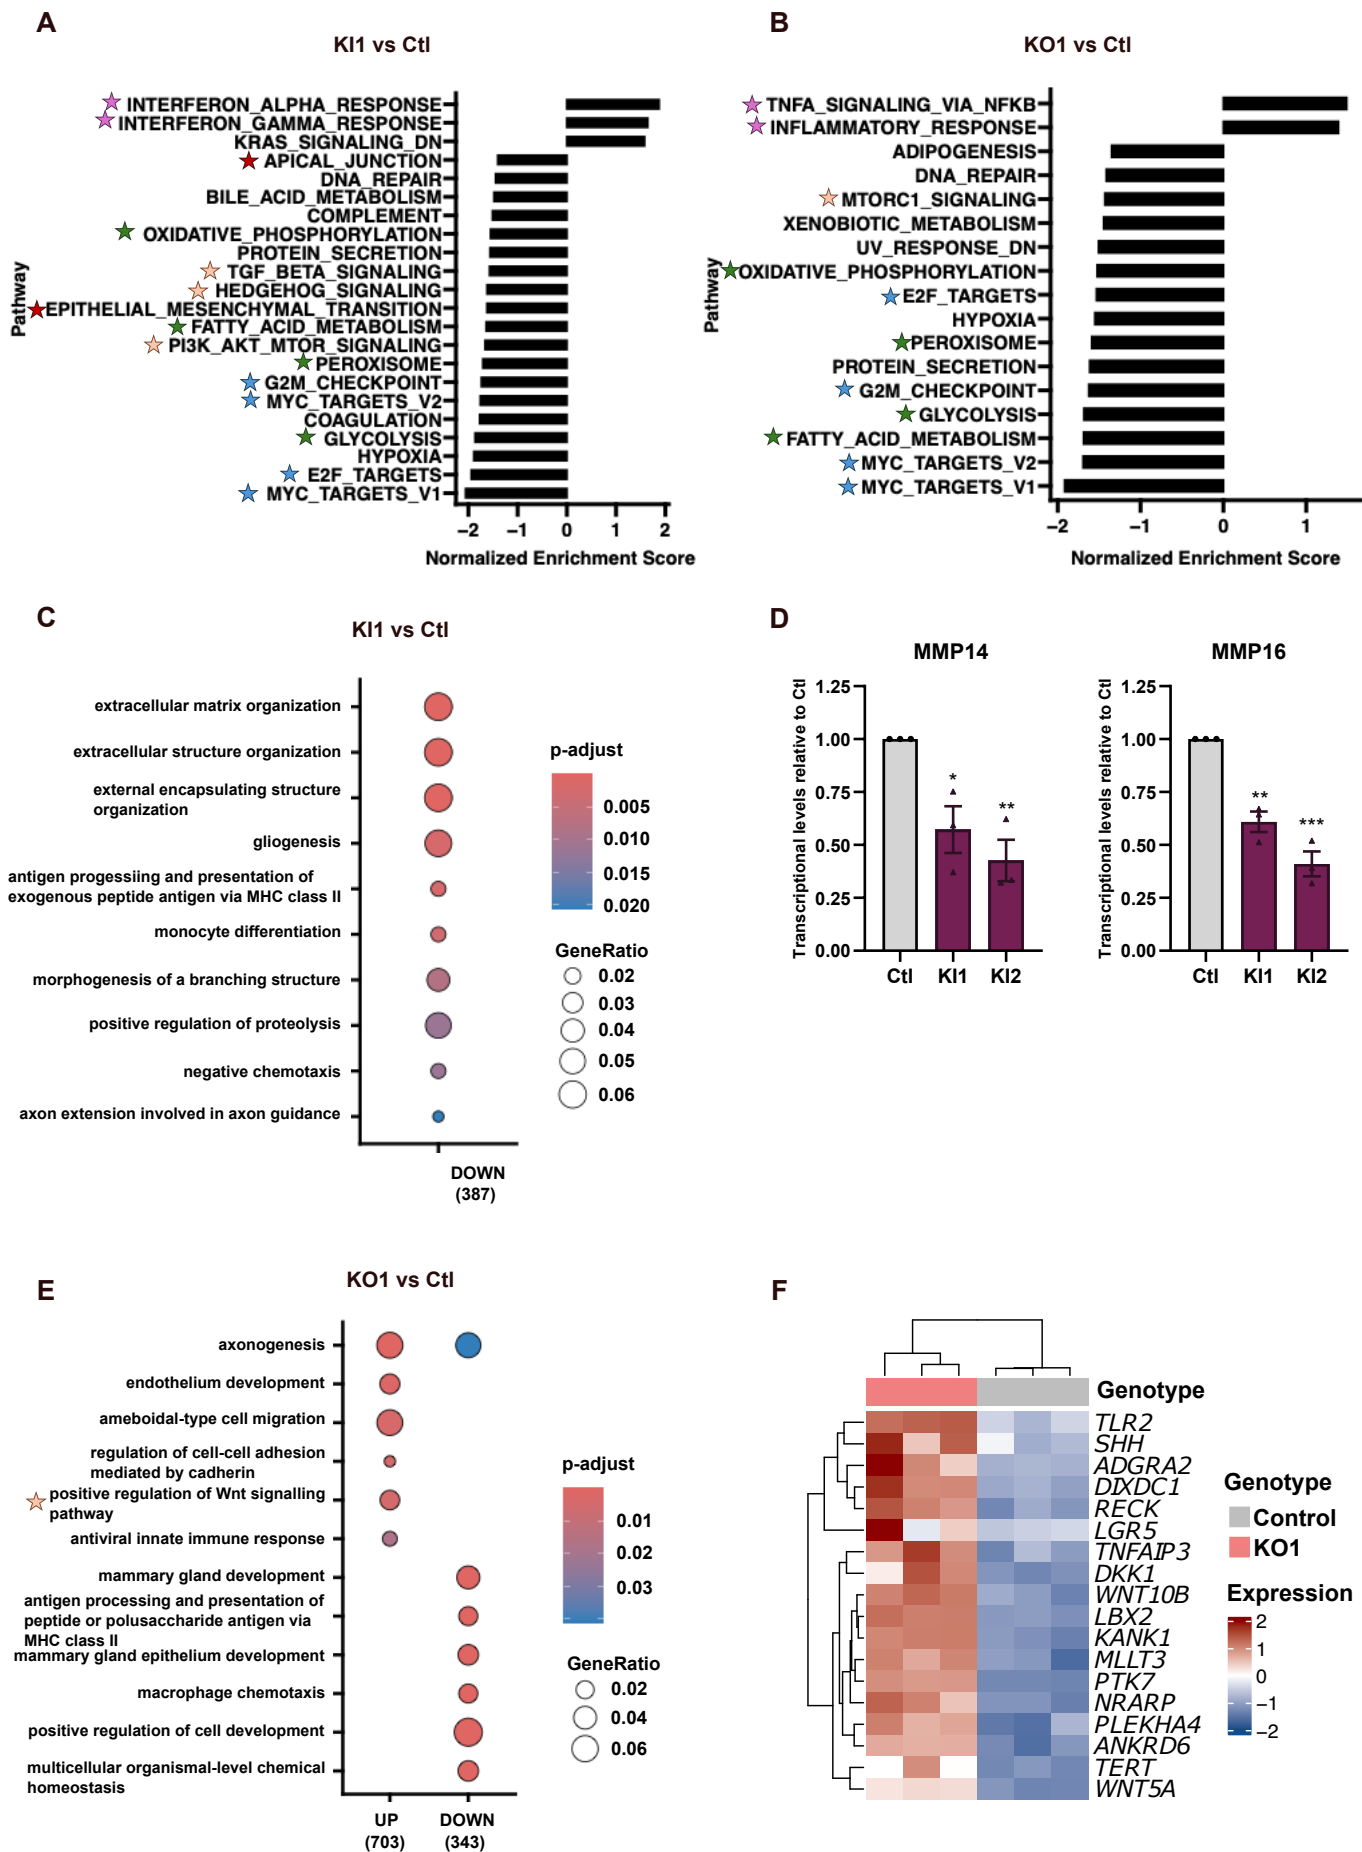

Supplement: Supplementary file 5 [file 9bdcd5c42c127b89305022b7.pdf]

Supplementary Figure 3

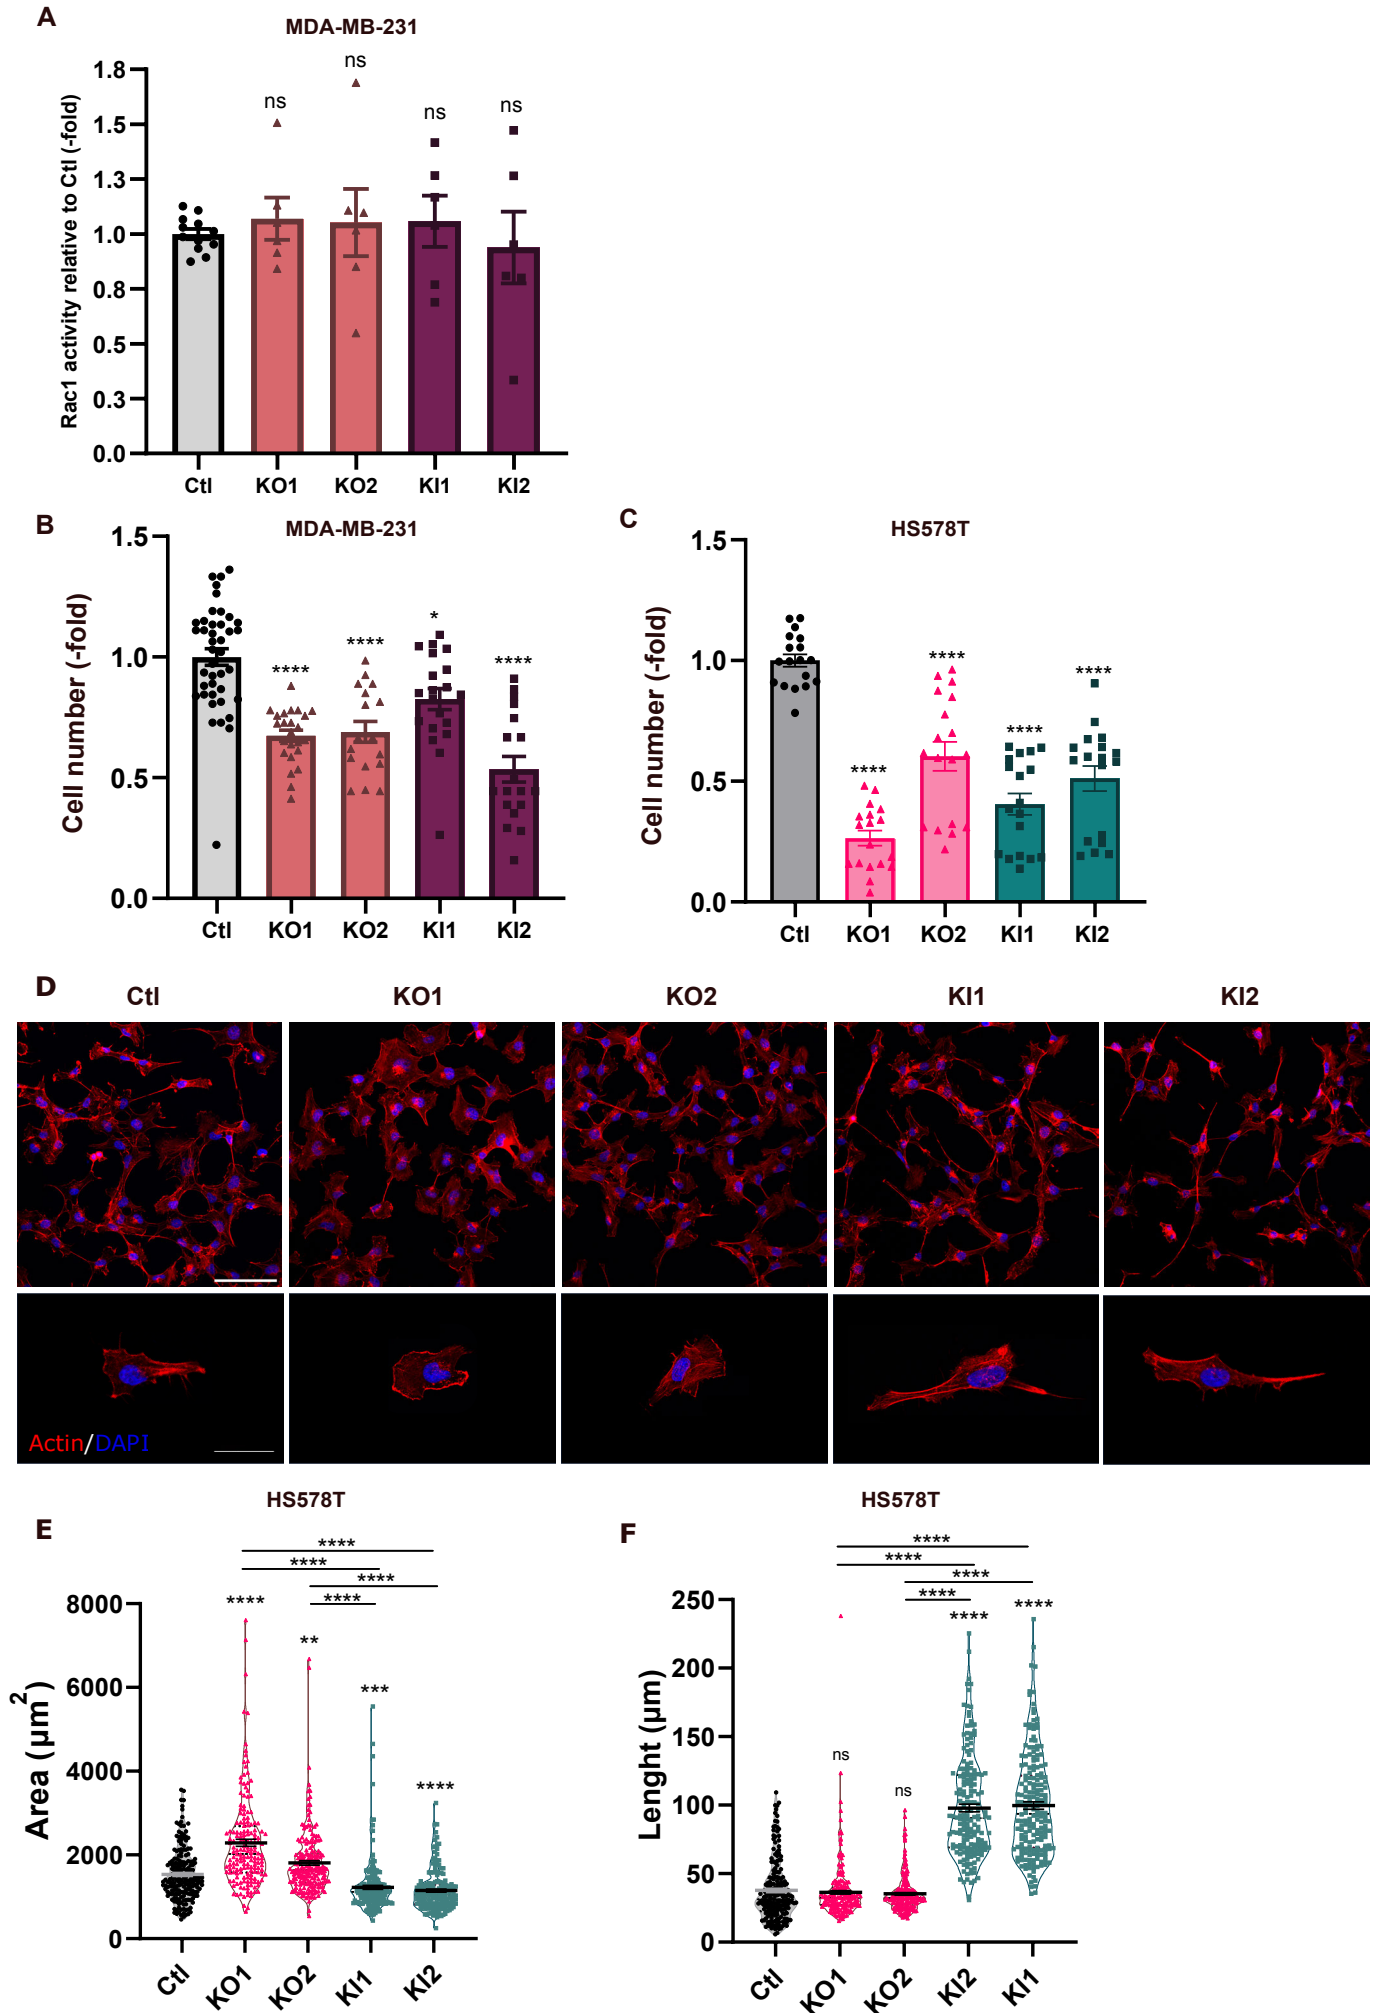

Supplement: Supplementary file 8 [file cbd8159b30bb4bb79250df16.pdf]

## Supplementary Figure 2

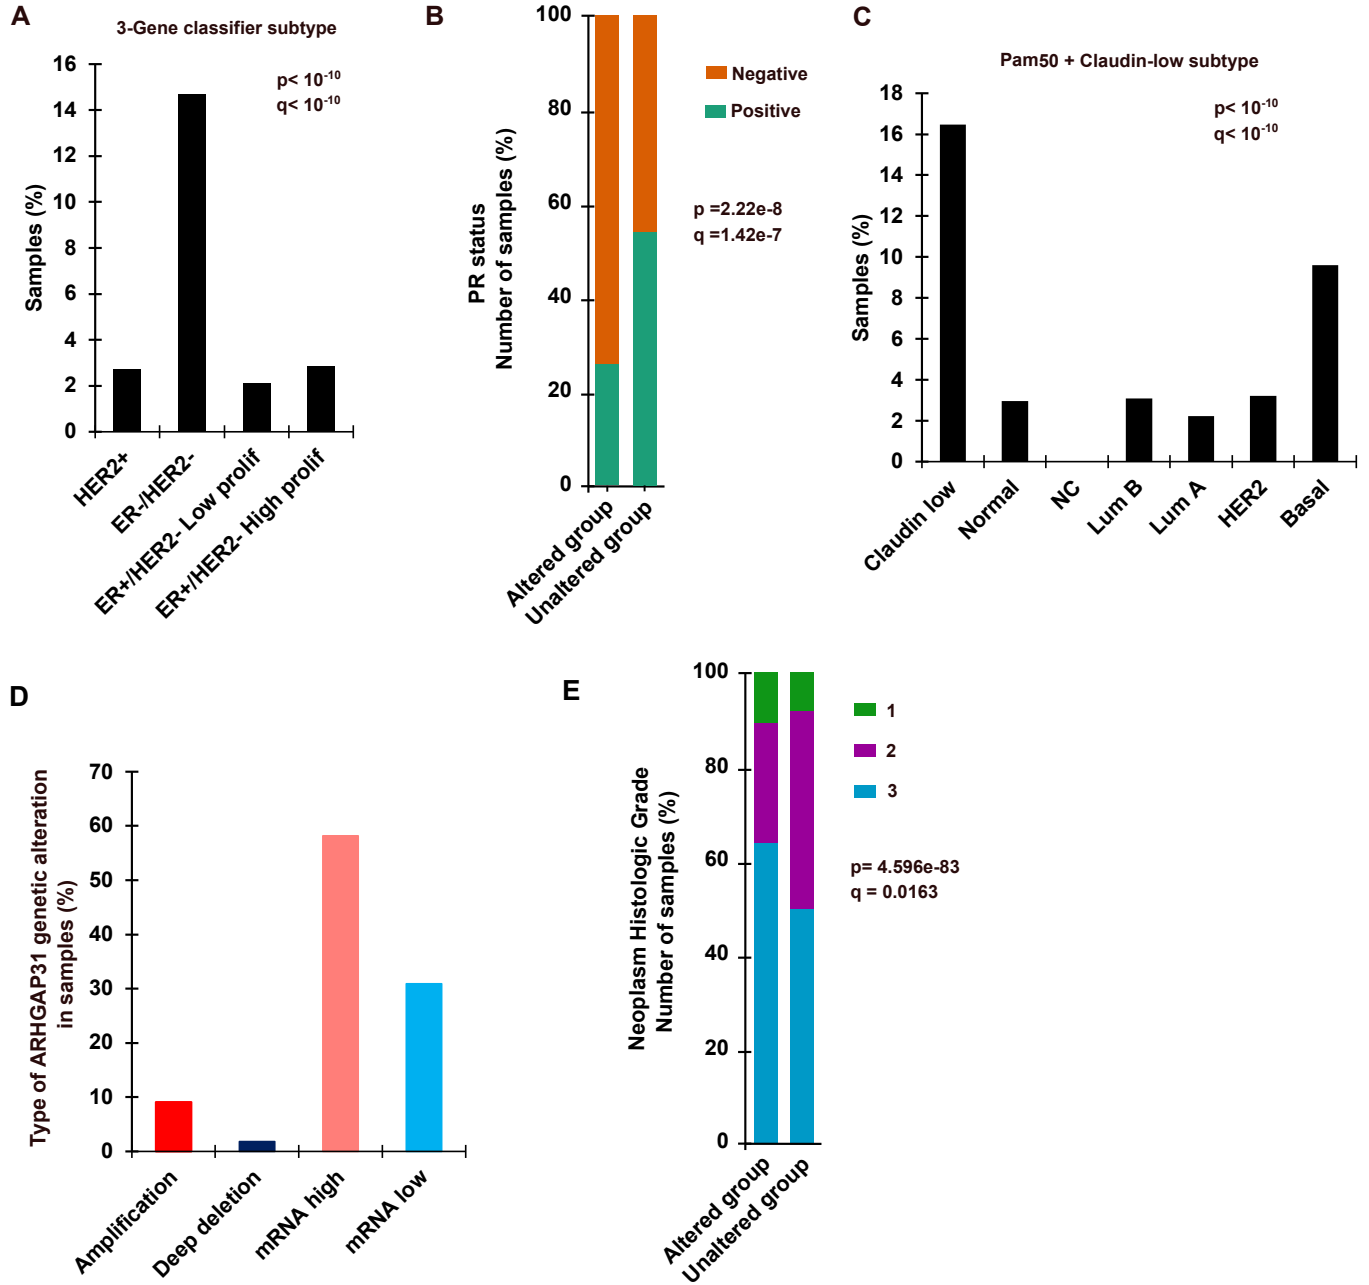

Supplement: Supplementary file 9 [file d7827a1bb79f49e8d40a6b2f.pdf]

## Supplementary Figure 9

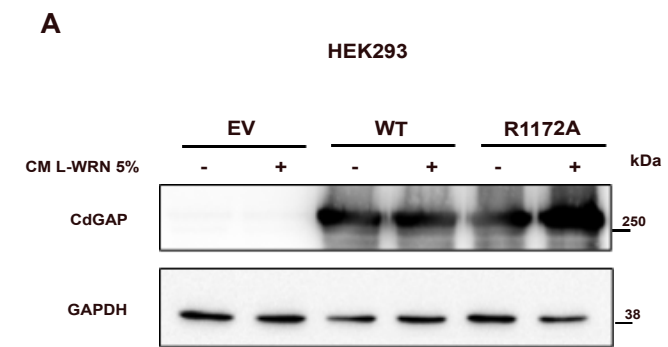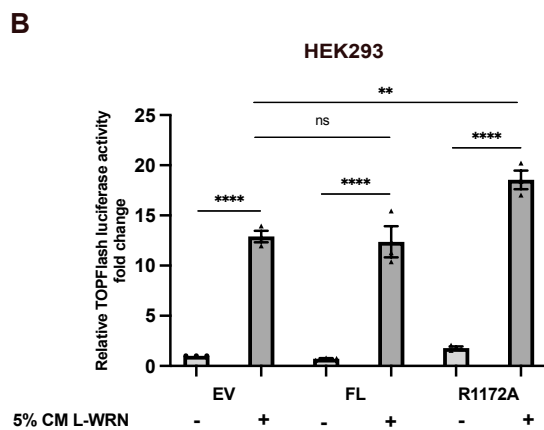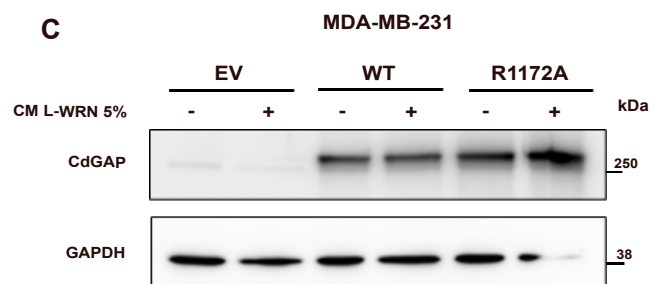

Supplement: Supplementary file 10 [file dc60566d80747d720b9feb81.pdf]
